# Supplementary material for: Understanding genomic diversity, pan-genome, and evolution of SARS-CoV-2
Source: PeerJ journal article supplement (doi:10.7717/peerj.9576), 2020-07-17

Tree scale: 1

### Taxonomy

- SARS-CoV-2
- SARS-CoV
- Pangolin CoV

### Host

- Human
- Bat
- Pangolin
- Monkey
- Civets
- Mouse
- Pig
- Unknown

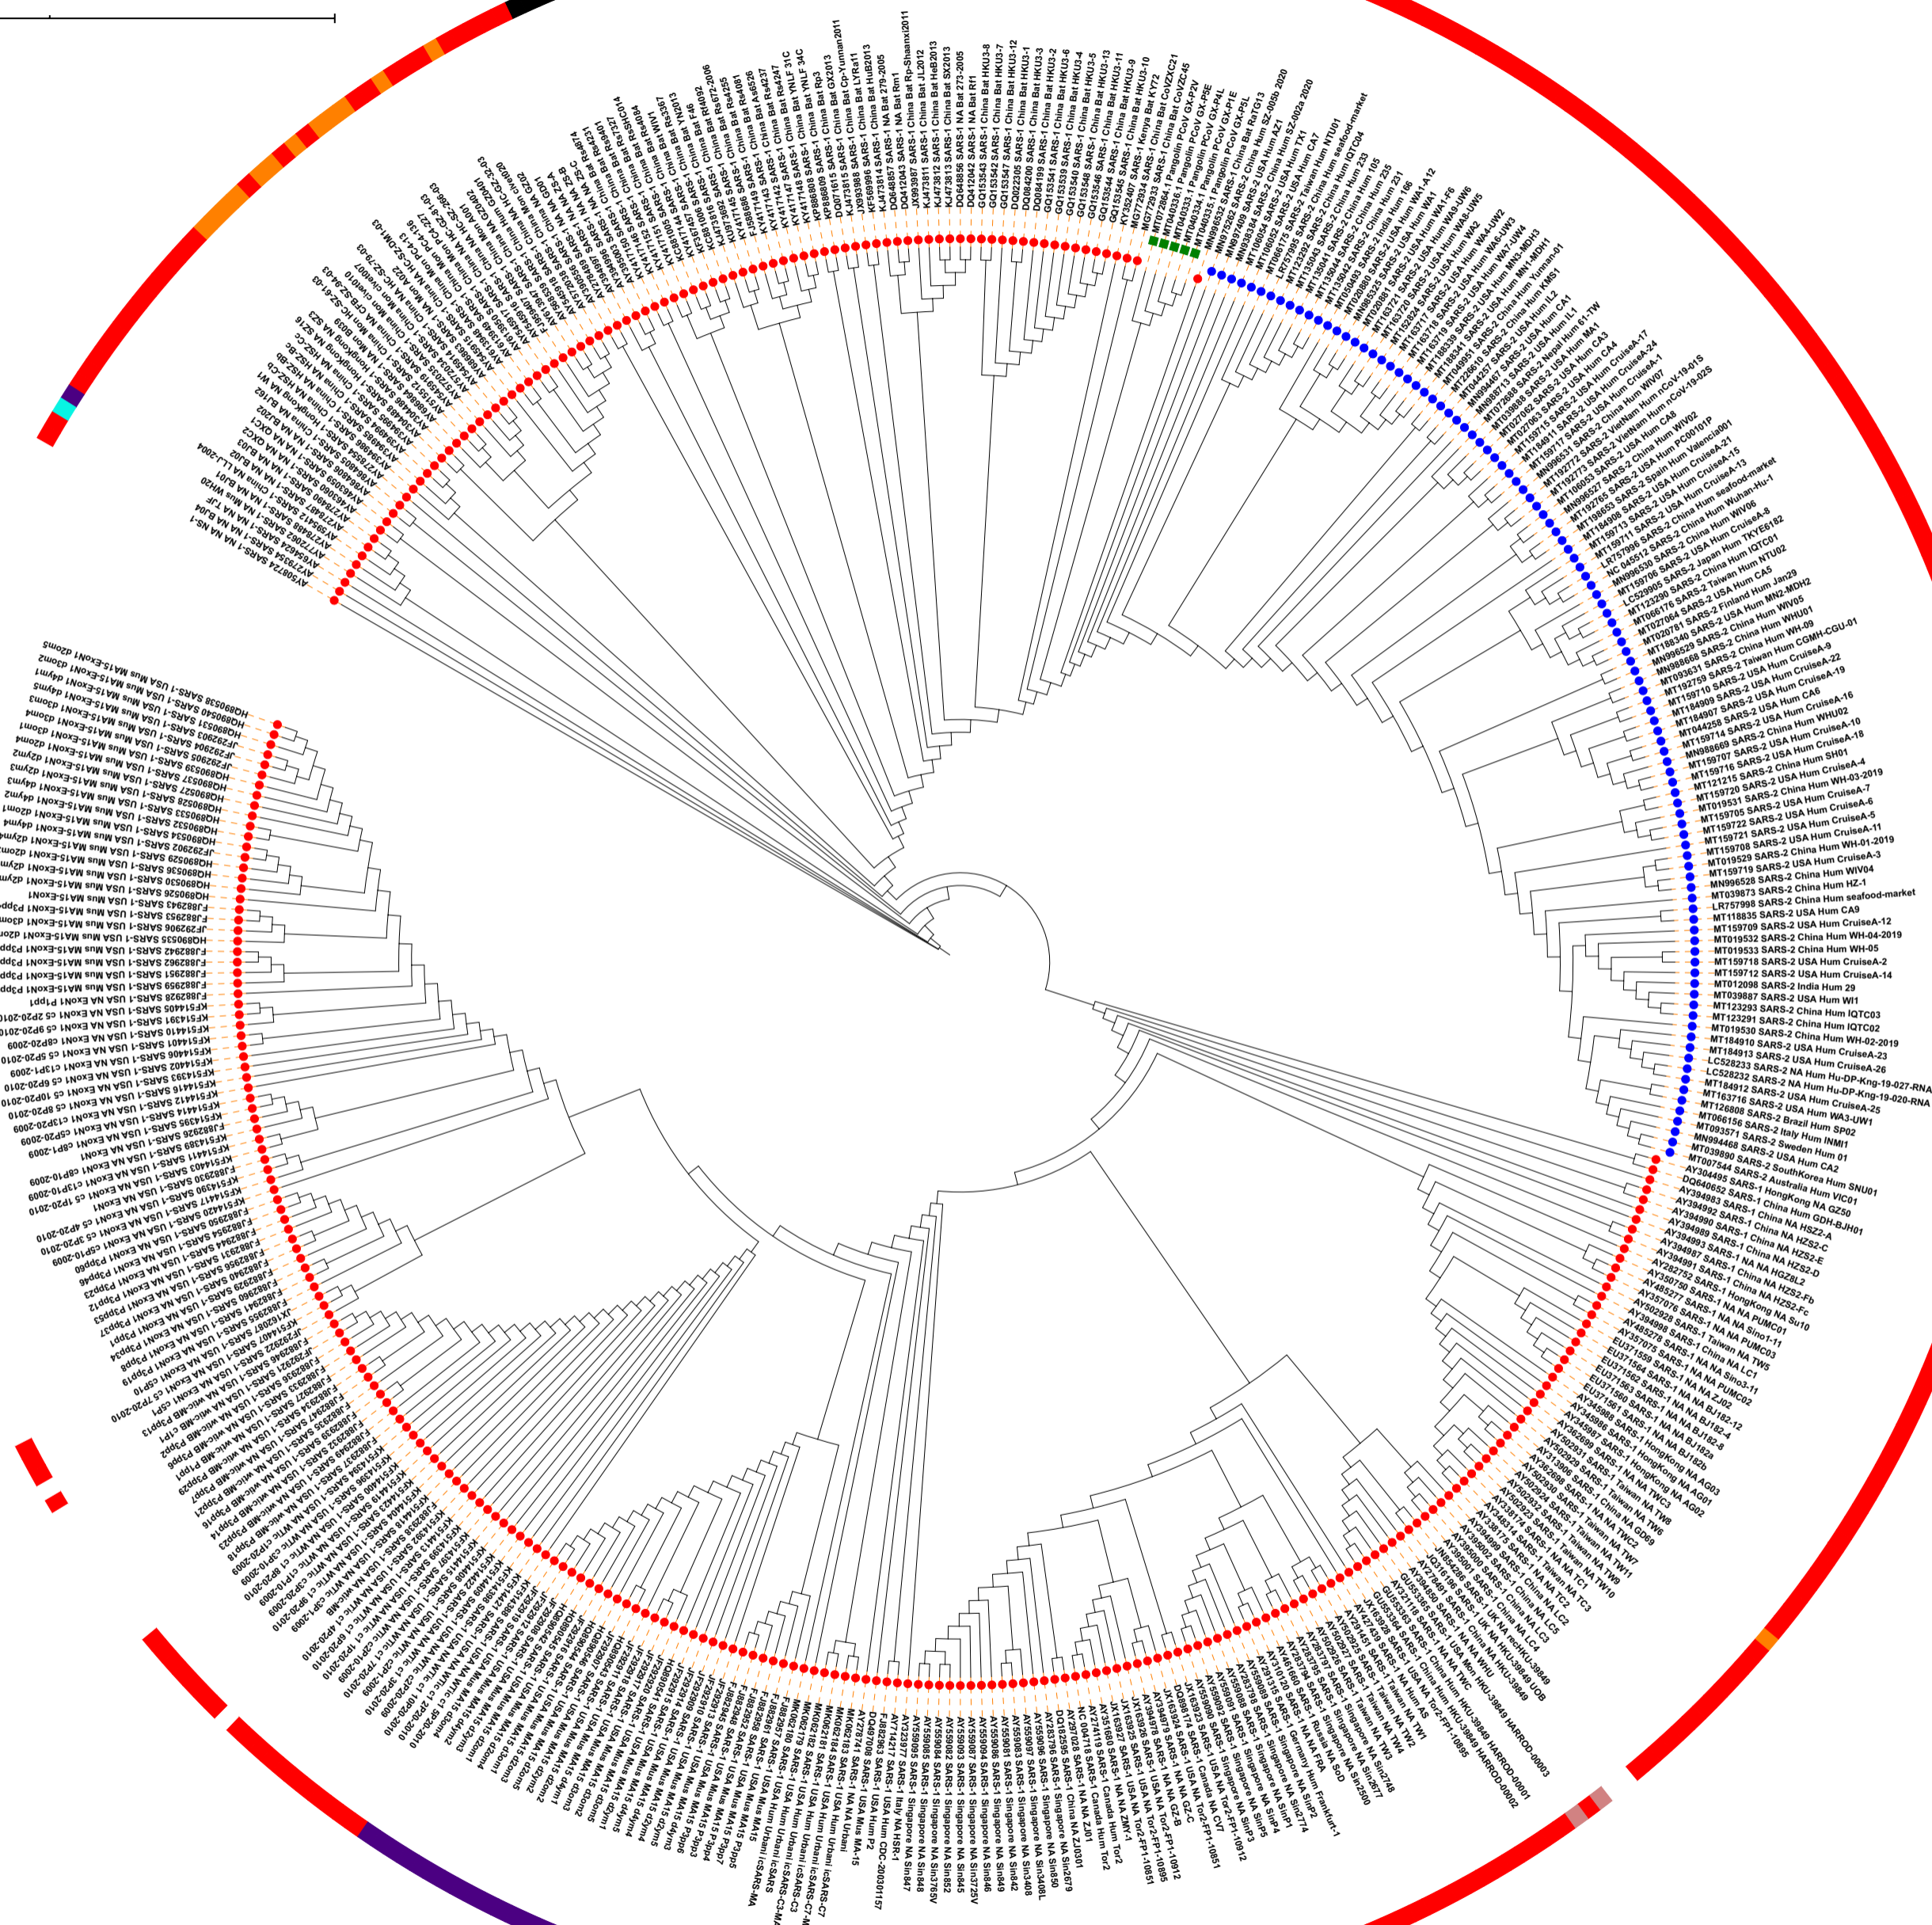

Supplement: Figure_S3.pdf [file Figure_S3.pdf]
