# Supplementary material for: Understanding genomic diversity, pan-genome, and evolution of SARS-CoV-2
Source: PeerJ journal article supplement (doi:10.7717/peerj.9576), 2020-07-17

**Geo Location:**

- China
- USA
- India
- Spain
- Vietnam
- Pakistan
- Sweden
- Japan
- Italy
- Brazil

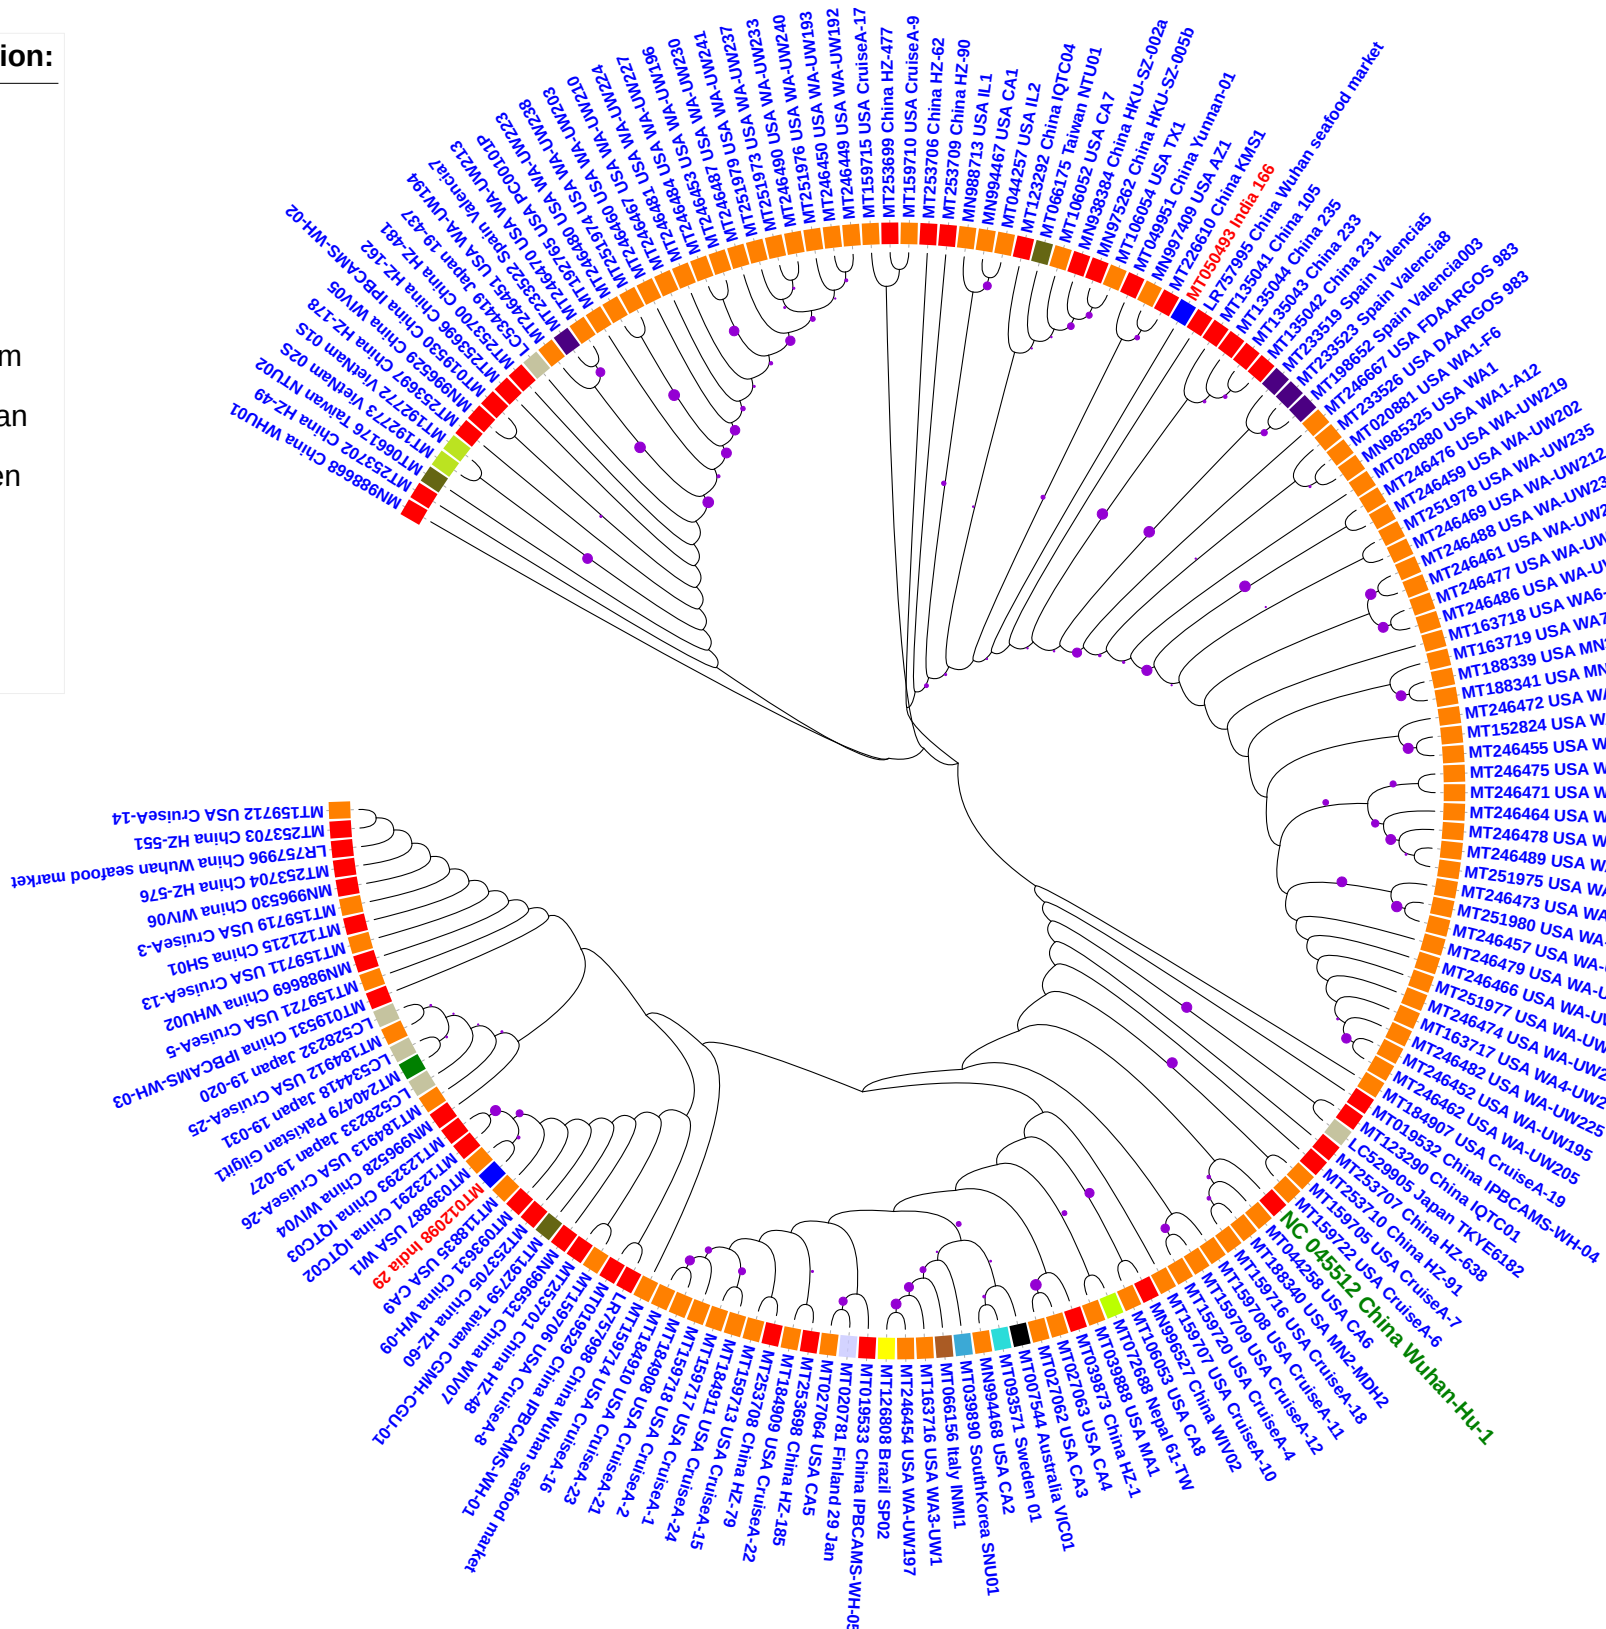

Supplement: Figure_S4.pdf [file Figure_S4.pdf]
