# Supplementary material for: Understanding genomic diversity, pan-genome, and evolution of SARS-CoV-2
Source: PeerJ. 2020 Jul 17;8:e9576. doi: 10.7717/peerj.9576 (PMC7370936; doi:10.7717/peerj.9576)
Supplement: Supplemental Information 8 [file peerj-08-9576-s008.xlsx]

## Sheet: SARS-CoV 420-Strains-info
Accession	Species	tag	Geo_Location	Host	Common_host_name	Genus	Family	Length	Nuc_Completeness	GenBank_Title	Isolation_Source	Collection_Date
MT040333.1	Pangolin CoV	MT040333.1__Pangolin__PCoV_GX-P4L	China	Manis javanica	Pangolin	Unclassified	Coronaviridae	29805	GenBank	Pangolin coronavirus isolate PCoV_GX-P4L, complete genome
MT040334.1	Pangolin CoV	MT040334.1__Pangolin__PCoV_GX-P1E	China	Manis javanica	Pangolin	Unclassified	Coronaviridae	29801	GenBank	Pangolin coronavirus isolate PCoV_GX-P1E, complete genome
MT040335.1	Pangolin CoV	MT040335.1__Pangolin__PCoV_GX-P5L	China	Manis javanica	Pangolin	Unclassified	Coronaviridae	29806	GenBank	Pangolin coronavirus isolate PCoV_GX-P5L, complete genome
MT040336.1	Pangolin CoV	MT040336.1__Pangolin__PCoV_GX-P5E	China	Manis javanica	Pangolin	Unclassified	Coronaviridae	29802	GenBank	Pangolin coronavirus isolate PCoV_GX-P5E, complete genome
MT072864.1	Pangolin CoV	MT072864.1__Pangolin__PCoV_GX-P2V	China	Pholidota	Pangolin	Unclassified	Coronaviridae	29795	GenBank	Pangolin coronavirus isolate PCoV_GX-P2V, complete genome
AY274119	SARS-CoV	AY274119__SARS-1__Canada__Hum__Tor2	Canada	Homo sapiens	Human	Betacoronavirus	Coronaviridae	29751	GenBank	Severe acute respiratory syndrome-related coronavirus isolate Tor2, complete genome
AY278487	SARS-CoV	AY278487__SARS-1__NA__NA__BJ02	China	Homo sapiens	Human	Betacoronavirus	Coronaviridae	29745	GenBank	SARS coronavirus BJ02, complete genome
AY278488	SARS-CoV	AY278488__SARS-1__NA__NA__BJ01	China	Homo sapiens	Human	Betacoronavirus	Coronaviridae	29725	GenBank	SARS coronavirus BJ01, complete genome
AY278489	SARS-CoV	AY278489__SARS-1__NA__NA__GD01	China	Homo sapiens	Human	Betacoronavirus	Coronaviridae	29757	GenBank	SARS coronavirus GD01, complete genome
AY278490	SARS-CoV	AY278490__SARS-1__NA__NA__BJ03	China	Homo sapiens	Human	Betacoronavirus	Coronaviridae	29740	GenBank	SARS coronavirus BJ03, complete genome
AY278491	SARS-CoV	AY278491__SARS-1__China__NA__HKU-39849	China: Hong Kong	Macaca mulatta	Monkey	Betacoronavirus	Coronaviridae	29742	GenBank	SARS coronavirus HKU-39849, complete genome
AY278554	SARS-CoV	AY278554__SARS-1__HongKong__NA__W1	China: Hong Kong	Homo sapiens	Human	Betacoronavirus	Coronaviridae	29736	GenBank	SARS coronavirus CUHK-W1, complete genome
AY278741	SARS-CoV	AY278741__SARS-1__NA__NA__Urbani	Hong Kong, Vietnam	Homo sapiens	Human	Betacoronavirus	Coronaviridae	29727	GenBank	SARS coronavirus Urbani, complete genome
AY279354	SARS-CoV	AY279354__SARS-1__NA__NA__BJ04	China	Homo sapiens	Human	Betacoronavirus	Coronaviridae	29732	GenBank	SARS coronavirus BJ04, complete genome
AY282752	SARS-CoV	AY282752__SARS-1__HongKong__NA__Su10	China	Homo sapiens	Human	Betacoronavirus	Coronaviridae	29736	GenBank	SARS coronavirus CUHK-Su10, complete genome
AY283794	SARS-CoV	AY283794__SARS-1__Singapore__NA__Sin2500	Singapore	Homo sapiens	Human	Betacoronavirus	Coronaviridae	29711	GenBank	SARS coronavirus Sin2500, complete genome
AY283795	SARS-CoV	AY283795__SARS-1__Singapore__NA__Sin2677	Singapore	Homo sapiens	Human	Betacoronavirus	Coronaviridae	29705	GenBank	SARS coronavirus Sin2677, complete genome
AY283796	SARS-CoV	AY283796__SARS-1__Singapore__NA__Sin2679	Singapore	Homo sapiens	Human	Betacoronavirus	Coronaviridae	29711	GenBank	SARS coronavirus Sin2679, complete genome
AY283797	SARS-CoV	AY283797__SARS-1__Singapore__NA__Sin2748	Singapore	Homo sapiens	Human	Betacoronavirus	Coronaviridae	29706	GenBank	SARS coronavirus Sin2748, complete genome
AY283798	SARS-CoV	AY283798__SARS-1__Singapore__NA__Sin2774	Singapore	Homo sapiens	Human	Betacoronavirus	Coronaviridae	29711	GenBank	SARS coronavirus Sin2774, complete genome
AY291315	SARS-CoV	AY291315__SARS-1__Germany__Hum__Frankfurt-1	Germany	Homo sapiens	Human	Betacoronavirus	Coronaviridae	29727	GenBank	SARS coronavirus Frankfurt 1, complete genome
AY291451	SARS-CoV	AY291451__SARS-1__Taiwan__NA__TW1	Taiwan	Homo sapiens	Human	Betacoronavirus	Coronaviridae	29729	GenBank	SARS coronavirus TW1, complete genome
AY297028	SARS-CoV	AY297028__SARS-1__NA__NA__ZJ01	China	Homo sapiens	Human	Betacoronavirus	Coronaviridae	29715	GenBank	SARS coronavirus ZJ01, complete genome
AY304486	SARS-CoV	AY304486__SARS-1__HongKong__NA__SZ3	Hong Kong	Paguma larvata	Civets	Betacoronavirus	Coronaviridae	29741	GenBank	SARS coronavirus SZ3, complete genome
AY304488	SARS-CoV	AY304488__SARS-1__HongKong__NA__SZ16	Hong Kong	Paguma larvata	Civets	Betacoronavirus	Coronaviridae	29731	GenBank	SARS coronavirus SZ16, complete genome
AY304495	SARS-CoV	AY304495__SARS-1__HongKong__NA__GZ50	Hong Kong	Paguma larvata	Civets	Betacoronavirus	Coronaviridae	29720	GenBank	SARS coronavirus GZ50, complete genome
AY310120	SARS-CoV	AY310120__SARS-1__NA__NA__FRA	Italy	Homo sapiens	Human	Betacoronavirus	Coronaviridae	29740	GenBank	SARS coronavirus FRA, complete genome
AY313906	SARS-CoV	AY313906__SARS-1__China__NA__GD69	China	Paguma larvata	Civets	Betacoronavirus	Coronaviridae	29754	GenBank	SARS coronavirus GD69, complete genome
AY321118	SARS-CoV	AY321118__SARS-1__NA__NA__TWC	Taiwan	Homo sapiens	Human	Betacoronavirus	Coronaviridae	29725	GenBank	SARS coronavirus TWC, complete genome
AY323977	SARS-CoV	AY323977__SARS-1__Italy__NA__HSR-1	Italy	Homo sapiens	Human	Betacoronavirus	Coronaviridae	29751	GenBank	SARS coronavirus HSR 1, complete genome
AY338174	SARS-CoV	AY338174__SARS-1__NA__NA__TC1	Taiwan	Homo sapiens	Human	Betacoronavirus	Coronaviridae	29573	GenBank	SARS coronavirus Taiwan TC1, complete genome
AY338175	SARS-CoV	AY338175__SARS-1__NA__NA__TC2	Taiwan	Homo sapiens	Human	Betacoronavirus	Coronaviridae	29573	GenBank	SARS coronavirus Taiwan TC2, complete genome
AY345986	SARS-CoV	AY345986__SARS-1__HongKong__NA__AG01	Hong Kong	Homo sapiens	Human	Betacoronavirus	Coronaviridae	29736	GenBank	SARS coronavirus CUHK-AG01, complete genome
AY345987	SARS-CoV	AY345987__SARS-1__HongKong__NA__AG02	Hong Kong	Homo sapiens	Human	Betacoronavirus	Coronaviridae	29736	GenBank	SARS coronavirus CUHK-AG02, complete genome
AY345988	SARS-CoV	AY345988__SARS-1__HongKong__NA__AG03	Hong Kong	Homo sapiens	Human	Betacoronavirus	Coronaviridae	29736	GenBank	SARS coronavirus CUHK-AG03, complete genome
AY348314	SARS-CoV	AY348314__SARS-1__Taiwan__NA__TC3	Taiwan	Homo sapiens	Human	Betacoronavirus	Coronaviridae	29573	GenBank	SARS coronavirus Taiwan TC3, complete genome
AY350750	SARS-CoV	AY350750__SARS-1__NA__NA__PUMC01	China	Homo sapiens	Human	Betacoronavirus	Coronaviridae	29738	GenBank	SARS coronavirus PUMC01, complete genome
AY351680	SARS-CoV	AY351680__SARS-1__NA__NA__ZMY-1	China	Homo sapiens	Human	Betacoronavirus	Coronaviridae	29749	GenBank	SARS coronavirus ZMY 1, complete genome
AY357075	SARS-CoV	AY357075__SARS-1__NA__NA__PUMC02	China	Homo sapiens	Human	Betacoronavirus	Coronaviridae	29738	GenBank	SARS coronavirus PUMC02, complete genome
AY357076	SARS-CoV	AY357076__SARS-1__NA__NA__PUMC03	China	Homo sapiens	Human	Betacoronavirus	Coronaviridae	29745	GenBank	SARS coronavirus PUMC03, complete genome
AY362698	SARS-CoV	AY362698__SARS-1__NA__NA__TWC2	Taiwan	Homo sapiens	Human	Betacoronavirus	Coronaviridae	29727	GenBank	SARS coronavirus TWC2, complete genome
AY362699	SARS-CoV	AY362699__SARS-1__NA__NA__TWC3	Taiwan	Homo sapiens	Human	Betacoronavirus	Coronaviridae	29727	GenBank	SARS coronavirus TWC3, complete genome
AY390556	SARS-CoV	AY390556__SARS-1__China__NA__GZ02	China	Homo sapiens	Human	Betacoronavirus	Coronaviridae	29760	GenBank	SARS coronavirus GZ02, complete genome
AY394850	SARS-CoV	AY394850__SARS-1__NA__NA__WHU	China	Homo sapiens	Human	Betacoronavirus	Coronaviridae	29728	GenBank	SARS coronavirus WHU, complete genome
AY394978	SARS-CoV	AY394978__SARS-1__NA__NA__GZ-B	China	Homo sapiens	Human	Betacoronavirus	Coronaviridae	29640	GenBank	SARS coronavirus GZ-B, complete genome
AY394979	SARS-CoV	AY394979__SARS-1__NA__NA__GZ-C	China	Homo sapiens	Human	Betacoronavirus	Coronaviridae	29645	GenBank	SARS coronavirus GZ-C, complete genome
AY394983	SARS-CoV	AY394983__SARS-1__China__NA__HSZ2-A	China	Homo sapiens	Human	Betacoronavirus	Coronaviridae	29699	GenBank	SARS coronavirus HSZ2-A, complete genome
AY394985	SARS-CoV	AY394985__SARS-1__China__NA__HSZ-Bb	China	Homo sapiens	Human	Betacoronavirus	Coronaviridae	29530	GenBank	SARS coronavirus HSZ-Bb, complete genome
AY394986	SARS-CoV	AY394986__SARS-1__China__NA__HSZ-Cb	China	Homo sapiens	Human	Betacoronavirus	Coronaviridae	29729	GenBank	SARS coronavirus HSZ-Cb, complete genome
AY394987	SARS-CoV	AY394987__SARS-1__China__NA__HZS2-Fb	China	Homo sapiens	Human	Betacoronavirus	Coronaviridae	29709	GenBank	SARS coronavirus HZS2-Fb, complete genome
AY394989	SARS-CoV	AY394989__SARS-1__China__NA__HZS2-D	China	Homo sapiens	Human	Betacoronavirus	Coronaviridae	29736	GenBank	SARS coronavirus HZS2-D, complete genome
AY394990	SARS-CoV	AY394990__SARS-1__China__NA__HZS2-E	China	Homo sapiens	Human	Betacoronavirus	Coronaviridae	29736	GenBank	SARS coronavirus HZS2-E, complete genome
AY394991	SARS-CoV	AY394991__SARS-1__China__NA__HZS2-Fc	China	Homo sapiens	Human	Betacoronavirus	Coronaviridae	29736	GenBank	SARS coronavirus HZS2-Fc, complete genome
AY394992	SARS-CoV	AY394992__SARS-1__China__NA__HZS2-C	China	Homo sapiens	Human	Betacoronavirus	Coronaviridae	29736	GenBank	SARS coronavirus HZS2-C, complete genome
AY394993	SARS-CoV	AY394993__SARS-1__NA__NA__HGZ8L2	China	Homo sapiens	Human	Betacoronavirus	Coronaviridae	29736	GenBank	SARS coronavirus HGZ8L2, complete genome
AY394994	SARS-CoV	AY394994__SARS-1__China__NA__HSZ-Bc	China	Homo sapiens	Human	Betacoronavirus	Coronaviridae	29765	GenBank	SARS coronavirus HSZ-Bc, complete genome
AY394995	SARS-CoV	AY394995__SARS-1__China__NA__HSZ-Cc	China	Homo sapiens	Human	Betacoronavirus	Coronaviridae	29765	GenBank	SARS coronavirus HSZ-Cc, complete genome
AY394996	SARS-CoV	AY394996__SARS-1__NA__NA__ZS-B	China	Homo sapiens	Human	Betacoronavirus	Coronaviridae	29683	GenBank	SARS coronavirus ZS-B, complete genome
AY394997	SARS-CoV	AY394997__SARS-1__NA__NA__ZS-A	China	Homo sapiens	Human	Betacoronavirus	Coronaviridae	29683	GenBank	SARS coronavirus ZS-A, complete genome
AY394998	SARS-CoV	AY394998__SARS-1__China__NA__LC1	China	Homo sapiens	Human	Betacoronavirus	Coronaviridae	29736	GenBank	SARS coronavirus LC1, complete genome
AY394999	SARS-CoV	AY394999__SARS-1__China__NA__LC2	China	Homo sapiens	Human	Betacoronavirus	Coronaviridae	29350	GenBank	SARS coronavirus LC2, complete genome
AY395000	SARS-CoV	AY395000__SARS-1__China__NA__LC3	China	Homo sapiens	Human	Betacoronavirus	Coronaviridae	29350	GenBank	SARS coronavirus LC3, complete genome
AY395001	SARS-CoV	AY395001__SARS-1__China__NA__LC4	China	Homo sapiens	Human	Betacoronavirus	Coronaviridae	29350	GenBank	SARS coronavirus LC4, complete genome
AY395002	SARS-CoV	AY395002__SARS-1__China__NA__LC5	China	Homo sapiens	Human	Betacoronavirus	Coronaviridae	29350	GenBank	SARS coronavirus LC5, complete genome
AY395003	SARS-CoV	AY395003__SARS-1__NA__NA__ZS-C	China	Homo sapiens	Human	Betacoronavirus	Coronaviridae	29647	GenBank	SARS coronavirus ZS-C, complete genome
AY427439	SARS-CoV	AY427439__SARS-1__NA__Hum__AS	Italy	Homo sapiens	Human	Betacoronavirus	Coronaviridae	29711	GenBank	SARS coronavirus AS, complete genome	oronasopharynx
AY461660	SARS-CoV	AY461660__SARS-1__Russia__NA__SoD	Russia	Homo sapiens	Human	Betacoronavirus	Coronaviridae	29715	GenBank	SARS coronavirus SoD, complete genome
AY463059	SARS-CoV	AY463059__SARS-1__NA__NA__QXC1	China	Homo sapiens	Human	Betacoronavirus	Coronaviridae	29592	GenBank	SARS coronavirus ShanghaiQXC1, complete genome
AY463060	SARS-CoV	AY463060__SARS-1__NA__NA__QXC2	China	Homo sapiens	Human	Betacoronavirus	Coronaviridae	29013	GenBank	SARS coronavirus ShanghaiQXC2, complete genome
AY485277	SARS-CoV	AY485277__SARS-1__NA__NA__Sino1-11	China	Homo sapiens	Human	Betacoronavirus	Coronaviridae	29741	GenBank	SARS coronavirus Sino1-11, complete genome
AY485278	SARS-CoV	AY485278__SARS-1__NA__NA__Sino3-11	China	Homo sapiens	Human	Betacoronavirus	Coronaviridae	29740	GenBank	SARS coronavirus Sino3-11, complete genome
AY502923	SARS-CoV	AY502923__SARS-1__Taiwan__NA__TW10	Taiwan	Homo sapiens	Human	Betacoronavirus	Coronaviridae	29729	GenBank	SARS coronavirus TW10, complete genome
AY502924	SARS-CoV	AY502924__SARS-1__Taiwan__NA__TW11	Taiwan	Homo sapiens	Human	Betacoronavirus	Coronaviridae	29727	GenBank	SARS coronavirus TW11, complete genome
AY502925	SARS-CoV	AY502925__SARS-1__Taiwan__NA__TW2	Taiwan	Homo sapiens	Human	Betacoronavirus	Coronaviridae	29729	GenBank	SARS coronavirus TW2, complete genome
AY502926	SARS-CoV	AY502926__SARS-1__Taiwan__NA__TW3	Taiwan	Homo sapiens	Human	Betacoronavirus	Coronaviridae	29729	GenBank	SARS coronavirus TW3, complete genome
AY502927	SARS-CoV	AY502927__SARS-1__Taiwan__NA__TW4	Taiwan	Homo sapiens	Human	Betacoronavirus	Coronaviridae	29729	GenBank	SARS coronavirus TW4, complete genome
AY502928	SARS-CoV	AY502928__SARS-1__Taiwan__NA__TW5	Taiwan	Homo sapiens	Human	Betacoronavirus	Coronaviridae	29729	GenBank	SARS coronavirus TW5, complete genome
AY502929	SARS-CoV	AY502929__SARS-1__Taiwan__NA__TW6	Taiwan	Homo sapiens	Human	Betacoronavirus	Coronaviridae	29729	GenBank	SARS coronavirus TW6, complete genome
AY502930	SARS-CoV	AY502930__SARS-1__Taiwan__NA__TW7	Taiwan	Homo sapiens	Human	Betacoronavirus	Coronaviridae	29729	GenBank	SARS coronavirus TW7, complete genome
AY502931	SARS-CoV	AY502931__SARS-1__Taiwan__NA__TW8	Taiwan	Homo sapiens	Human	Betacoronavirus	Coronaviridae	29729	GenBank	SARS coronavirus TW8, complete genome
AY502932	SARS-CoV	AY502932__SARS-1__Taiwan__NA__TW9	Taiwan	Homo sapiens	Human	Betacoronavirus	Coronaviridae	29729	GenBank	SARS coronavirus TW9, complete genome
AY508724	SARS-CoV	AY508724__SARS-1__NA__NA__NS-1	China	Homo sapiens	Human	Betacoronavirus	Coronaviridae	29732	GenBank	SARS coronavirus NS-1, complete genome
AY515512	SARS-CoV	AY515512__SARS-1__China__Mon__HC-SZ-61-03	China	Paguma larvata	Civets	Betacoronavirus	Coronaviridae	29731	GenBank	SARS coronavirus HC/SZ/61/03, complete genome
AY545914	SARS-CoV	AY545914__SARS-1__China__NA__HC-SZ-79-03	China	Homo sapiens	Human	Betacoronavirus	Coronaviridae	29723	GenBank	SARS coronavirus isolate HC/SZ/79/03, complete genome
AY545915	SARS-CoV	AY545915__SARS-1__China__NA__HC-SZ-DM1-03	China	Homo sapiens	Human	Betacoronavirus	Coronaviridae	29714	GenBank	SARS coronavirus isolate HC/SZ/DM1/03, complete genome
AY545916	SARS-CoV	AY545916__SARS-1__China__NA__HC-SZ-266-03	China	Homo sapiens	Human	Betacoronavirus	Coronaviridae	29721	GenBank	SARS coronavirus isolate HC/SZ/266/03, complete genome
AY545917	SARS-CoV	AY545917__SARS-1__China__NA__HC-GZ-81-03	China	Homo sapiens	Human	Betacoronavirus	Coronaviridae	29739	GenBank	SARS coronavirus isolate HC/GZ/81/03, complete genome
AY545918	SARS-CoV	AY545918__SARS-1__China__NA__HC-GZ-32-03	China	Homo sapiens	Human	Betacoronavirus	Coronaviridae	29737	GenBank	SARS coronavirus isolate HC/GZ/32/03, complete genome
AY545919	SARS-CoV	AY545919__SARS-1__China__NA__CFB-SZ-94-03	China	Homo sapiens	Human	Betacoronavirus	Coronaviridae	29739	GenBank	SARS coronavirus isolate CFB/SZ/94/03, complete genome
AY559081	SARS-CoV	AY559081__SARS-1__Singapore__NA__Sin842	Singapore	Homo sapiens	Human	Betacoronavirus	Coronaviridae	29716	GenBank	SARS coronavirus Sin842, complete genome
AY559082	SARS-CoV	AY559082__SARS-1__Singapore__NA__Sin852	Singapore	Homo sapiens	Human	Betacoronavirus	Coronaviridae	29670	GenBank	SARS coronavirus Sin852, complete genome
AY559083	SARS-CoV	AY559083__SARS-1__Singapore__NA__Sin3408	Singapore	Homo sapiens	Human	Betacoronavirus	Coronaviridae	29767	GenBank	SARS coronavirus Sin3408, complete genome
AY559084	SARS-CoV	AY559084__SARS-1__Singapore__NA__Sin3765V	Singapore	Homo sapiens	Human	Betacoronavirus	Coronaviridae	29722	GenBank	SARS coronavirus Sin3765V, complete genome
AY559085	SARS-CoV	AY559085__SARS-1__Singapore__NA__Sin848	Singapore	Homo sapiens	Human	Betacoronavirus	Coronaviridae	29713	GenBank	SARS coronavirus Sin848, complete genome
AY559086	SARS-CoV	AY559086__SARS-1__Singapore__NA__Sin849	Singapore	Homo sapiens	Human	Betacoronavirus	Coronaviridae	29661	GenBank	SARS coronavirus Sin849, complete genome
AY559087	SARS-CoV	AY559087__SARS-1__Singapore__NA__Sin3725V	Singapore	Homo sapiens	Human	Betacoronavirus	Coronaviridae	29716	GenBank	SARS coronavirus Sin3725V, complete genome
AY559088	SARS-CoV	AY559088__SARS-1__Singapore__NA__SinP1	Singapore	Homo sapiens	Human	Betacoronavirus	Coronaviridae	29714	GenBank	SARS coronavirus SinP1, complete genome
AY559089	SARS-CoV	AY559089__SARS-1__Singapore__NA__SinP2	Singapore	Homo sapiens	Human	Betacoronavirus	Coronaviridae	29717	GenBank	SARS coronavirus SinP2, complete genome
AY559090	SARS-CoV	AY559090__SARS-1__Singapore__NA__SinP3	Singapore	Homo sapiens	Human	Betacoronavirus	Coronaviridae	29725	GenBank	SARS coronavirus SinP3, complete genome
AY559091	SARS-CoV	AY559091__SARS-1__Singapore__NA__SinP4	Singapore	Homo sapiens	Human	Betacoronavirus	Coronaviridae	29710	GenBank	SARS coronavirus SinP4, complete genome
AY559092	SARS-CoV	AY559092__SARS-1__Singapore__NA__SinP5	Singapore	Homo sapiens	Human	Betacoronavirus	Coronaviridae	29713	GenBank	SARS coronavirus SinP5, complete genome
AY559093	SARS-CoV	AY559093__SARS-1__Singapore__NA__Sin845	Singapore	Homo sapiens	Human	Betacoronavirus	Coronaviridae	29712	GenBank	SARS coronavirus Sin845, complete genome
AY559094	SARS-CoV	AY559094__SARS-1__Singapore__NA__Sin846	Singapore	Homo sapiens	Human	Betacoronavirus	Coronaviridae	29577	GenBank	SARS coronavirus Sin846, complete genome
AY559095	SARS-CoV	AY559095__SARS-1__Singapore__NA__Sin847	Singapore	Homo sapiens	Human	Betacoronavirus	Coronaviridae	29719	GenBank	SARS coronavirus Sin847, complete genome
AY559096	SARS-CoV	AY559096__SARS-1__Singapore__NA__Sin850	Singapore	Homo sapiens	Human	Betacoronavirus	Coronaviridae	29720	GenBank	SARS coronavirus Sin850, complete genome
AY559097	SARS-CoV	AY559097__SARS-1__Singapore__NA__Sin3408L	Singapore	Homo sapiens	Human	Betacoronavirus	Coronaviridae	29715	GenBank	SARS coronavirus Sin3408L, complete genome
AY568539	SARS-CoV	AY568539__SARS-1__China__Hum__GZ0401	China	Homo sapiens	Human	Betacoronavirus	Coronaviridae	29730	GenBank	SARS coronavirus GZ0401, complete genome	oronasopharynx
AY572034	SARS-CoV	AY572034__SARS-1__China__Mon__civet007	China	Viverridae	Civets	Betacoronavirus	Coronaviridae	29540	GenBank	SARS coronavirus civet007, complete genome	feces
AY572035	SARS-CoV	AY572035__SARS-1__China__Mon__civet010	China	Viverridae	Civets	Betacoronavirus	Coronaviridae	29518	GenBank	SARS coronavirus civet010, complete genome	feces
AY572038	SARS-CoV	AY572038__SARS-1__China__Mon__civet020	China	Viverridae	Civets	Betacoronavirus	Coronaviridae	29683	GenBank	SARS coronavirus civet020, complete genome	feces
AY595412	SARS-CoV	AY595412__SARS-1__China__NA__LLJ-2004	China	Homo sapiens	Human	Betacoronavirus	Coronaviridae	29716	GenBank	SARS coronavirus LLJ-2004, complete genome
AY613947	SARS-CoV	AY613947__SARS-1__China__NA__GZ0402	China	Homo sapiens	Human	Betacoronavirus	Coronaviridae	29730	GenBank	SARS coronavirus GZ0402, complete genome
AY613948	SARS-CoV	AY613948__SARS-1__China__Mon__PC4-13	China	Paradoxurus hermaphroditus	Civets	Betacoronavirus	Coronaviridae	29730	GenBank	SARS coronavirus PC4-13, complete genome
AY613949	SARS-CoV	AY613949__SARS-1__China__Mon__PC4-136	China	Paradoxurus hermaphroditus	Civets	Betacoronavirus	Coronaviridae	29730	GenBank	SARS coronavirus PC4-136, complete genome
AY613950	SARS-CoV	AY613950__SARS-1__China__Mon__PC4-227	China	Paradoxurus hermaphroditus	Civets	Betacoronavirus	Coronaviridae	29728	GenBank	SARS coronavirus PC4-227, complete genome
AY654624	SARS-CoV	AY654624__SARS-1__NA__NA__TJF	China	Sus scrofa	Pig	Betacoronavirus	Coronaviridae	29745	GenBank	SARS coronavirus TJF, complete genome
AY686863	SARS-CoV	AY686863__SARS-1__NA__Mon__A022	China	Paradoxurus hermaphroditus	Civets	Betacoronavirus	Coronaviridae	29499	GenBank	SARS coronavirus A022, complete genome
AY686864	SARS-CoV	AY686864__SARS-1__NA__Mon__B039	China	Paradoxurus hermaphroditus	Civets	Betacoronavirus	Coronaviridae	29525	GenBank	SARS coronavirus B039, complete genome
AY714217	SARS-CoV	AY714217__SARS-1__USA__Hum__CDC-200301157	USA	Homo sapiens	Human	Betacoronavirus	Coronaviridae	29727	GenBank	SARS Coronavirus CDC#200301157, complete genome	oronasopharynx
AY772062	SARS-CoV	AY772062__SARS-1__NA__Mus__WH20	China	Mus musculus	Mouse	Betacoronavirus	Coronaviridae	29461	GenBank	SARS coronavirus WH20, complete genome
AY864805	SARS-CoV	AY864805__SARS-1__China__NA__BJ162	China	Homo sapiens	Human	Betacoronavirus	Coronaviridae	29751	GenBank	SARS coronavirus BJ162, complete genome
AY864806	SARS-CoV	AY864806__SARS-1__NA__NA__BJ202	China	Homo sapiens	Human	Betacoronavirus	Coronaviridae	29751	GenBank	SARS coronavirus BJ202, complete genome
DQ022305	SARS-CoV	DQ022305__SARS-1__China__Bat__HKU3-1	China	Rhinolophidae	BAT	Betacoronavirus	Coronaviridae	29728	GenBank	Bat SARS coronavirus HKU3-1, complete genome
DQ071615	SARS-CoV	DQ071615__SARS-1__China__Bat__Rp3	China	Chiroptera	BAT	Betacoronavirus	Coronaviridae	29736	GenBank	Bat SARS coronavirus Rp3, complete genome
DQ084199	SARS-CoV	DQ084199__SARS-1__China__Bat__HKU3-2	China	Rhinolophidae	BAT	Betacoronavirus	Coronaviridae	29687	GenBank	bat SARS coronavirus HKU3-2, complete genome
DQ084200	SARS-CoV	DQ084200__SARS-1__China__Bat__HKU3-3	China	Rhinolophidae	BAT	Betacoronavirus	Coronaviridae	29711	GenBank	bat SARS coronavirus HKU3-3, complete genome
DQ182595	SARS-CoV	DQ182595__SARS-1__China__NA__ZJ0301	China	Homo sapiens	Human	Betacoronavirus	Coronaviridae	29706	GenBank	SARS coronavirus ZJ0301 from China, complete genome		2003-04-21
DQ412042	SARS-CoV	DQ412042__SARS-1__NA__Bat__Rf1	China	Rhinolophus ferrumequinum	BAT	Betacoronavirus	Coronaviridae	29709	GenBank	Bat SARS coronavirus Rf1, complete genome
DQ412043	SARS-CoV	DQ412043__SARS-1__NA__Bat__Rm1	China	Rhinolophus macrotis	BAT	Betacoronavirus	Coronaviridae	29749	GenBank	Bat SARS coronavirus Rm1, complete genome
DQ497008	SARS-CoV	DQ497008__SARS-1__USA__Mus__MA-15	USA	Mus musculus	Mouse	Betacoronavirus	Coronaviridae	29727	GenBank	SARS coronavirus strain MA-15, complete genome
DQ640652	SARS-CoV	DQ640652__SARS-1__China__Hum__GDH-BJH01	China	Homo sapiens	Human	Betacoronavirus	Coronaviridae	29746	GenBank	SARS coronavirus GDH-BJH01, complete genome	lung
DQ648856	SARS-CoV	DQ648856__SARS-1__NA__Bat__273-2005	China	BAT	BAT	Betacoronavirus	Coronaviridae	29704	GenBank	Bat coronavirus (BtCoV/273/2005), complete genome
DQ648857	SARS-CoV	DQ648857__SARS-1__NA__Bat__279-2005	China	BAT	BAT	Betacoronavirus	Coronaviridae	29741	GenBank	Bat coronavirus (BtCoV/279/2005), complete genome
DQ898174	SARS-CoV	DQ898174__SARS-1__Canada__NA__CV7	Canada	NA	NA	Betacoronavirus	Coronaviridae	29751	GenBank	SARS coronavirus strain CV7, complete genome
EU371559	SARS-CoV	EU371559__SARS-1__NA__NA__ZJ02	China	Homo sapiens	Human	Betacoronavirus	Coronaviridae	29731	GenBank	SARS coronavirus ZJ02, complete genome
EU371560	SARS-CoV	EU371560__SARS-1__NA__NA__BJ182a	China	Homo sapiens	Human	Betacoronavirus	Coronaviridae	29731	GenBank	SARS coronavirus BJ182a, complete genome
EU371561	SARS-CoV	EU371561__SARS-1__NA__NA__BJ182b	China	Homo sapiens	Human	Betacoronavirus	Coronaviridae	29602	GenBank	SARS coronavirus BJ182b, complete genome
EU371562	SARS-CoV	EU371562__SARS-1__NA__NA__BJ182-4	China	Homo sapiens	Human	Betacoronavirus	Coronaviridae	29602	GenBank	SARS coronavirus BJ182-4, complete genome
EU371563	SARS-CoV	EU371563__SARS-1__NA__NA__BJ182-8	China	Homo sapiens	Human	Betacoronavirus	Coronaviridae	29602	GenBank	SARS coronavirus BJ182-8, complete genome
EU371564	SARS-CoV	EU371564__SARS-1__NA__NA__BJ182-12	China	Homo sapiens	Human	Betacoronavirus	Coronaviridae	29512	GenBank	SARS coronavirus BJ182-12, complete genome
FJ588686	SARS-CoV	FJ588686__SARS-1__China__Bat__Rs672-2006	China	Rhinolophus sinicus	BAT	Betacoronavirus	Coronaviridae	29059	GenBank	Bat SARS CoV Rs672/2006, complete genome		2006
FJ882926	SARS-CoV	FJ882926__SARS-1__USA__NA__ExoN1	USA	NA	NA	Betacoronavirus	Coronaviridae	29675	GenBank	SARS coronavirus ExoN1, complete genome		2007-09-22
FJ882927	SARS-CoV	FJ882927__SARS-1__USA__NA__wtic-MB_P1pp1	USA	NA	NA	Betacoronavirus	Coronaviridae	29687	GenBank	SARS coronavirus wtic-MB isolate P1pp1, complete genome		2007-09-26
FJ882928	SARS-CoV	FJ882928__SARS-1__USA__NA__ExoN1_P1pp1	USA	NA	NA	Betacoronavirus	Coronaviridae	29687	GenBank	SARS coronavirus ExoN1 isolate P1pp1, complete genome		2007-08-28
FJ882929	SARS-CoV	FJ882929__SARS-1__USA__NA__ExoN1_P3pp1	USA	NA	NA	Betacoronavirus	Coronaviridae	29665	GenBank	SARS coronavirus ExoN1 isolate P3pp1, complete genome		2008-03-28
FJ882930	SARS-CoV	FJ882930__SARS-1__USA__NA__ExoN1	USA	NA	NA	Betacoronavirus	Coronaviridae	29687	GenBank	SARS coronavirus ExoN1, complete genome		2007-09-22
FJ882931	SARS-CoV	FJ882931__SARS-1__USA__NA__ExoN1_P3pp12	USA	NA	NA	Betacoronavirus	Coronaviridae	29646	GenBank	SARS coronavirus ExoN1 isolate P3pp12, complete genome		2008-03-28
FJ882932	SARS-CoV	FJ882932__SARS-1__USA__NA__wtic-MB_P3pp14	USA	NA	NA	Betacoronavirus	Coronaviridae	29646	GenBank	SARS coronavirus wtic-MB isolate P3pp14, complete genome		2008-03-28
FJ882933	SARS-CoV	FJ882933__SARS-1__USA__NA__wtic-MB_P3pp6	USA	NA	NA	Betacoronavirus	Coronaviridae	29648	GenBank	SARS coronavirus wtic-MB isolate P3pp6, complete genome		2008-03-28
FJ882934	SARS-CoV	FJ882934__SARS-1__USA__NA__wtic-MB_P3pp29	USA	NA	NA	Betacoronavirus	Coronaviridae	29647	GenBank	SARS coronavirus wtic-MB isolate P3pp29, complete genome		2008-03-28
FJ882935	SARS-CoV	FJ882935__SARS-1__USA__NA__wtic-MB_P3pp21	USA	NA	NA	Betacoronavirus	Coronaviridae	29647	GenBank	SARS coronavirus wtic-MB isolate P3pp21, complete genome		2008-03-28
FJ882936	SARS-CoV	FJ882936__SARS-1__USA__NA__wtic-MB_P3pp2	USA	NA	NA	Betacoronavirus	Coronaviridae	29646	GenBank	SARS coronavirus wtic-MB isolate P3pp2, complete genome		2008-03-28
FJ882937	SARS-CoV	FJ882937__SARS-1__USA__NA__wtic-MB_P3pp18	USA	NA	NA	Betacoronavirus	Coronaviridae	29648	GenBank	SARS coronavirus wtic-MB isolate P3pp18, complete genome		2008-03-28
FJ882938	SARS-CoV	FJ882938__SARS-1__USA__NA__wtic-MB	USA	NA	NA	Betacoronavirus	Coronaviridae	29687	GenBank	SARS coronavirus wtic-MB, complete genome		2007-09-22
FJ882939	SARS-CoV	FJ882939__SARS-1__USA__NA__wtic-MB_P3pp16	USA	NA	NA	Betacoronavirus	Coronaviridae	29646	GenBank	SARS coronavirus wtic-MB isolate P3pp16, complete genome		2008-03-28
FJ882940	SARS-CoV	FJ882940__SARS-1__USA__NA__ExoN1_P3pp37	USA	NA	NA	Betacoronavirus	Coronaviridae	29646	GenBank	SARS coronavirus ExoN1 isolate P3pp37, complete genome		2008-08-06
FJ882941	SARS-CoV	FJ882941__SARS-1__USA__NA__ExoN1_P3pp8	USA	NA	NA	Betacoronavirus	Coronaviridae	29665	GenBank	SARS coronavirus ExoN1 isolate P3pp8, complete genome		2008-03-28
FJ882942	SARS-CoV	FJ882942__SARS-1__USA__Mus__MA15-ExoN1_P3pp5	USA	Mus musculus	Mouse	Betacoronavirus	Coronaviridae	29721	GenBank	SARS coronavirus MA15 ExoN1 isolate P3pp5, complete genome		2008-11-26
FJ882943	SARS-CoV	FJ882943__SARS-1__USA__Mus__MA15-ExoN1	USA	Mus musculus	Mouse	Betacoronavirus	Coronaviridae	29720	GenBank	SARS coronavirus MA15 ExoN1, complete genome		2008-11-21
FJ882944	SARS-CoV	FJ882944__SARS-1__USA__NA__ExoN1_P3pp23	USA	NA	NA	Betacoronavirus	Coronaviridae	29628	GenBank	SARS coronavirus ExoN1 isolate P3pp23, complete genome		2008-03-28
FJ882945	SARS-CoV	FJ882945__SARS-1__USA__Mus__MA15_P3pp6	USA	Mus musculus	Mouse	Betacoronavirus	Coronaviridae	29720	GenBank	SARS coronavirus MA15 isolate P3pp6, complete genome		2008-11-25
FJ882946	SARS-CoV	FJ882946__SARS-1__USA__NA__wtic-MB_P3pp13	USA	NA	NA	Betacoronavirus	Coronaviridae	29647	GenBank	SARS coronavirus wtic-MB isolate P3pp13, complete genome		2008-03-28
FJ882947	SARS-CoV	FJ882947__SARS-1__USA__NA__wtic-MB_P3pp7	USA	NA	NA	Betacoronavirus	Coronaviridae	29616	GenBank	SARS coronavirus wtic-MB isolate P3pp7, complete genome		2008-03-28
FJ882948	SARS-CoV	FJ882948__SARS-1__USA__Mus__MA15_P3pp3	USA	Mus musculus	Mouse	Betacoronavirus	Coronaviridae	29720	GenBank	SARS coronavirus MA15 isolate P3pp3, complete genome		2008-11-25
FJ882949	SARS-CoV	FJ882949__SARS-1__USA__NA__wtic-MB_P3pp23	USA	NA	NA	Betacoronavirus	Coronaviridae	29647	GenBank	SARS coronavirus wtic-MB isolate P3pp23, complete genome		2008-03-28
FJ882950	SARS-CoV	FJ882950__SARS-1__USA__NA__ExoN1_P3pp60	USA	NA	NA	Betacoronavirus	Coronaviridae	29646	GenBank	SARS coronavirus ExoN1 isolate P3pp60, complete genome		2008-08-06
FJ882951	SARS-CoV	FJ882951__SARS-1__USA__Mus__MA15-ExoN1_P3pp3	USA	Mus musculus	Mouse	Betacoronavirus	Coronaviridae	29721	GenBank	SARS coronavirus MA15 ExoN1 isolate P3pp3, complete genome		2008-11-26
FJ882952	SARS-CoV	FJ882952__SARS-1__USA__Mus__MA15_P3pp4	USA	Mus musculus	Mouse	Betacoronavirus	Coronaviridae	29720	GenBank	SARS coronavirus MA15 isolate P3pp4, complete genome		2008-11-25
FJ882953	SARS-CoV	FJ882953__SARS-1__USA__Mus__MA15-ExoN1_P3pp4	USA	Mus musculus	Mouse	Betacoronavirus	Coronaviridae	29648	GenBank	SARS coronavirus MA15 ExoN1 isolate P3pp4, complete genome		2008-11-26
FJ882954	SARS-CoV	FJ882954__SARS-1__USA__NA__ExoN1_P3pp46	USA	NA	NA	Betacoronavirus	Coronaviridae	29636	GenBank	SARS coronavirus ExoN1 isolate P3pp46, complete genome		2008-08-06
FJ882955	SARS-CoV	FJ882955__SARS-1__USA__NA__ExoN1_P3pp19	USA	NA	NA	Betacoronavirus	Coronaviridae	29646	GenBank	SARS coronavirus ExoN1 isolate P3pp19, complete genome		2008-03-28
FJ882956	SARS-CoV	FJ882956__SARS-1__USA__NA__ExoN1_P3pp53	USA	NA	NA	Betacoronavirus	Coronaviridae	29644	GenBank	SARS coronavirus ExoN1 isolate P3pp53, complete genome		2008-08-06
FJ882957	SARS-CoV	FJ882957__SARS-1__USA__Mus__MA15	USA	Mus musculus	Mouse	Betacoronavirus	Coronaviridae	29720	GenBank	SARS coronavirus MA15, complete genome		2008-11-25
FJ882958	SARS-CoV	FJ882958__SARS-1__USA__Mus__MA15_P3pp7	USA	Mus musculus	Mouse	Betacoronavirus	Coronaviridae	29720	GenBank	SARS coronavirus MA15 isolate P3pp7, complete genome		2008-11-25
FJ882959	SARS-CoV	FJ882959__SARS-1__USA__Mus__MA15-ExoN1_P3pp6	USA	Mus musculus	Mouse	Betacoronavirus	Coronaviridae	29721	GenBank	SARS coronavirus MA15 ExoN1 isolate P3pp6, complete genome		2008-11-26
FJ882960	SARS-CoV	FJ882960__SARS-1__USA__NA__ExoN1_P3pp34	USA	NA	NA	Betacoronavirus	Coronaviridae	29646	GenBank	SARS coronavirus ExoN1 isolate P3pp34, complete genome		2008-08-06
FJ882961	SARS-CoV	FJ882961__SARS-1__USA__Mus__MA15_P3pp5	USA	Mus musculus	Mouse	Betacoronavirus	Coronaviridae	29720	GenBank	SARS coronavirus MA15 isolate P3pp5, complete genome		2008-11-25
FJ882962	SARS-CoV	FJ882962__SARS-1__USA__Mus__MA15-ExoN1_P3pp10	USA	Mus musculus	Mouse	Betacoronavirus	Coronaviridae	29721	GenBank	SARS coronavirus MA15 ExoN1 isolate P3pp10, complete genome		2008-12-18
FJ882963	SARS-CoV	FJ882963__SARS-1__USA__Hum__P2	USA	Homo sapiens	Human	Betacoronavirus	Coronaviridae	29682	GenBank	SARS coronavirus P2, complete genome		2004-08-10
FJ959407	SARS-CoV	FJ959407__SARS-1__China__Mon__A001	China	Paradoxurus hermaphroditus	Civets	Betacoronavirus	Coronaviridae	29694	GenBank	SARS coronavirus isolate A001, complete genome
GQ153539	SARS-CoV	GQ153539__SARS-1__China__Bat__HKU3-4	China	Rhinolophus	BAT	Betacoronavirus	Coronaviridae	29704	GenBank	Bat SARS coronavirus HKU3-4, complete genome
GQ153540	SARS-CoV	GQ153540__SARS-1__China__Bat__HKU3-5	China	Rhinolophus	BAT	Betacoronavirus	Coronaviridae	29704	GenBank	Bat SARS coronavirus HKU3-5, complete genome
GQ153541	SARS-CoV	GQ153541__SARS-1__China__Bat__HKU3-6	China	Rhinolophus	BAT	Betacoronavirus	Coronaviridae	29704	GenBank	Bat SARS coronavirus HKU3-6, complete genome
GQ153542	SARS-CoV	GQ153542__SARS-1__China__Bat__HKU3-7	China	Rhinolophus	BAT	Betacoronavirus	Coronaviridae	29716	GenBank	Bat SARS coronavirus HKU3-7, complete genome
GQ153543	SARS-CoV	GQ153543__SARS-1__China__Bat__HKU3-8	China	Rhinolophus	BAT	Betacoronavirus	Coronaviridae	29681	GenBank	Bat SARS coronavirus HKU3-8, complete genome
GQ153544	SARS-CoV	GQ153544__SARS-1__China__Bat__HKU3-9	China	Rhinolophus	BAT	Betacoronavirus	Coronaviridae	29695	GenBank	Bat SARS coronavirus HKU3-9, complete genome
GQ153545	SARS-CoV	GQ153545__SARS-1__China__Bat__HKU3-10	China	Rhinolophus	BAT	Betacoronavirus	Coronaviridae	29695	GenBank	Bat SARS coronavirus HKU3-10, complete genome
GQ153546	SARS-CoV	GQ153546__SARS-1__China__Bat__HKU3-11	China	Rhinolophus	BAT	Betacoronavirus	Coronaviridae	29695	GenBank	Bat SARS coronavirus HKU3-11, complete genome
GQ153547	SARS-CoV	GQ153547__SARS-1__China__Bat__HKU3-12	China	Rhinolophus	BAT	Betacoronavirus	Coronaviridae	29704	GenBank	Bat SARS coronavirus HKU3-12, complete genome
GQ153548	SARS-CoV	GQ153548__SARS-1__China__Bat__HKU3-13	China	Rhinolophus	BAT	Betacoronavirus	Coronaviridae	29677	GenBank	Bat SARS coronavirus HKU3-13, complete genome
GU553363	SARS-CoV	GU553363__SARS-1__China__Hum__HKU-39849_HARROD-00001	China	Homo sapiens	Human	Betacoronavirus	Coronaviridae	29644	GenBank	SARS coronavirus HKU-39849 isolate TCVSP-HARROD-00001, complete genome		2003-06-07
GU553364	SARS-CoV	GU553364__SARS-1__China__Hum__HKU-39849_HARROD-00002	China	Homo sapiens	Human	Betacoronavirus	Coronaviridae	29644	GenBank	SARS coronavirus HKU-39849 isolate TCVSP-HARROD-00002, complete genome		2003-06-07
GU553365	SARS-CoV	GU553365__SARS-1__USA__Mon__HKU-39849_HARROD-00003	USA	Chlorocebus aethiops	Monkey	Betacoronavirus	Coronaviridae	29644	GenBank	SARS coronavirus HKU-39849 isolate TCVSP-HARROD-00003, complete genome	lung	2007-12-05
HQ890526	SARS-CoV	HQ890526__SARS-1__USA__Mus__MA15-ExoN1_d2ym1	USA	Mus musculus	Mouse	Betacoronavirus	Coronaviridae	29646	GenBank	SARS coronavirus MA15 ExoN1 isolate d2ym1, complete genome		2008-10-08
HQ890527	SARS-CoV	HQ890527__SARS-1__USA__Mus__MA15-ExoN1_d2ym2	USA	Mus musculus	Mouse	Betacoronavirus	Coronaviridae	29646	GenBank	SARS coronavirus MA15 ExoN1 isolate d2ym2, complete genome		2008-10-08
HQ890528	SARS-CoV	HQ890528__SARS-1__USA__Mus__MA15-ExoN1_d2ym3	USA	Mus musculus	Mouse	Betacoronavirus	Coronaviridae	29646	GenBank	SARS coronavirus MA15 ExoN1 isolate d2ym3, complete genome		2008-10-08
HQ890529	SARS-CoV	HQ890529__SARS-1__USA__Mus__MA15-ExoN1_d2ym4	USA	Mus musculus	Mouse	Betacoronavirus	Coronaviridae	29646	GenBank	SARS coronavirus MA15 ExoN1 isolate d2ym4, complete genome		2008-10-08
HQ890530	SARS-CoV	HQ890530__SARS-1__USA__Mus__MA15-ExoN1_d2ym5	USA	Mus musculus	Mouse	Betacoronavirus	Coronaviridae	29646	GenBank	SARS coronavirus MA15 ExoN1 isolate d2ym5, complete genome		2008-10-08
HQ890531	SARS-CoV	HQ890531__SARS-1__USA__Mus__MA15-ExoN1_d4ym1	USA	Mus musculus	Mouse	Betacoronavirus	Coronaviridae	29645	GenBank	SARS coronavirus MA15 ExoN1 isolate d4ym1, complete genome		2008-10-10
HQ890532	SARS-CoV	HQ890532__SARS-1__USA__Mus__MA15-ExoN1_d4ym2	USA	Mus musculus	Mouse	Betacoronavirus	Coronaviridae	29645	GenBank	SARS coronavirus MA15 ExoN1 isolate d4ym2, complete genome		2008-10-10
HQ890533	SARS-CoV	HQ890533__SARS-1__USA__Mus__MA15-ExoN1_d4ym3	USA	Mus musculus	Mouse	Betacoronavirus	Coronaviridae	29646	GenBank	SARS coronavirus MA15 ExoN1 isolate d4ym3, complete genome		2008-10-10
HQ890534	SARS-CoV	HQ890534__SARS-1__USA__Mus__MA15-ExoN1_d2om1	USA	Mus musculus	Mouse	Betacoronavirus	Coronaviridae	29646	GenBank	SARS coronavirus MA15 ExoN1 isolate d2om1, complete genome		2008-09-17
HQ890535	SARS-CoV	HQ890535__SARS-1__USA__Mus__MA15-ExoN1_d2om2	USA	Mus musculus	Mouse	Betacoronavirus	Coronaviridae	29646	GenBank	SARS coronavirus MA15 ExoN1 isolate d2om2, complete genome		2008-09-17
HQ890536	SARS-CoV	HQ890536__SARS-1__USA__Mus__MA15-ExoN1_d2om3	USA	Mus musculus	Mouse	Betacoronavirus	Coronaviridae	29646	GenBank	SARS coronavirus MA15 ExoN1 isolate d2om3, complete genome		2008-09-17
HQ890537	SARS-CoV	HQ890537__SARS-1__USA__Mus__MA15-ExoN1_d2om4	USA	Mus musculus	Mouse	Betacoronavirus	Coronaviridae	29646	GenBank	SARS coronavirus MA15 ExoN1 isolate d2om4, complete genome		2008-09-17
HQ890538	SARS-CoV	HQ890538__SARS-1__USA__Mus__MA15-ExoN1_d2om5	USA	Mus musculus	Mouse	Betacoronavirus	Coronaviridae	29646	GenBank	SARS coronavirus MA15 ExoN1 isolate d2om5, complete genome		2008-09-17
HQ890539	SARS-CoV	HQ890539__SARS-1__USA__Mus__MA15-ExoN1_d3om1	USA	Mus musculus	Mouse	Betacoronavirus	Coronaviridae	29646	GenBank	SARS coronavirus MA15 ExoN1 isolate d3om1, complete genome		2008-09-18
HQ890540	SARS-CoV	HQ890540__SARS-1__USA__Mus__MA15-ExoN1_d3om2	USA	Mus musculus	Mouse	Betacoronavirus	Coronaviridae	29646	GenBank	SARS coronavirus MA15 ExoN1 isolate d3om2, complete genome		2008-09-18
HQ890541	SARS-CoV	HQ890541__SARS-1__USA__Mus__MA15_d2ym1	USA	Mus musculus	Mouse	Betacoronavirus	Coronaviridae	29646	GenBank	SARS coronavirus MA15 isolate d2ym1, complete genome		2008-10-08
HQ890542	SARS-CoV	HQ890542__SARS-1__USA__Mus__MA15_d2om1	USA	Mus musculus	Mouse	Betacoronavirus	Coronaviridae	29646	GenBank	SARS coronavirus MA15 isolate d2om1, complete genome		2008-09-17
HQ890543	SARS-CoV	HQ890543__SARS-1__USA__Mus__MA15_d2om2	USA	Mus musculus	Mouse	Betacoronavirus	Coronaviridae	29646	GenBank	SARS coronavirus MA15 isolate d2om2, complete genome		2008-09-17
HQ890544	SARS-CoV	HQ890544__SARS-1__USA__Mus__MA15_d2om3	USA	Mus musculus	Mouse	Betacoronavirus	Coronaviridae	29646	GenBank	SARS coronavirus MA15 isolate d2om3, complete genome		2008-09-17
HQ890545	SARS-CoV	HQ890545__SARS-1__USA__Mus__MA15_d2om4	USA	Mus musculus	Mouse	Betacoronavirus	Coronaviridae	29646	GenBank	SARS coronavirus MA15 isolate d2om4, complete genome		2008-09-17
HQ890546	SARS-CoV	HQ890546__SARS-1__USA__Mus__MA15_d2om5	USA	Mus musculus	Mouse	Betacoronavirus	Coronaviridae	29646	GenBank	SARS coronavirus MA15 isolate d2om5, complete genome		2008-09-17
JF292902	SARS-CoV	JF292902__SARS-1__USA__Mus__MA15-ExoN1_d4ym4	USA	Mus musculus	Mouse	Betacoronavirus	Coronaviridae	29646	GenBank	SARS coronavirus MA15 ExoN1 isolate d4ym4, complete genome		2008-10-10
JF292903	SARS-CoV	JF292903__SARS-1__USA__Mus__MA15-ExoN1_d4ym5	USA	Mus musculus	Mouse	Betacoronavirus	Coronaviridae	29645	GenBank	SARS coronavirus MA15 ExoN1 isolate d4ym5, complete genome		2008-10-10
JF292904	SARS-CoV	JF292904__SARS-1__USA__Mus__MA15-ExoN1_d3om3	USA	Mus musculus	Mouse	Betacoronavirus	Coronaviridae	29645	GenBank	SARS coronavirus MA15 ExoN1 isolate d3om3, complete genome		2008-09-18
JF292905	SARS-CoV	JF292905__SARS-1__USA__Mus__MA15-ExoN1_d3om4	USA	Mus musculus	Mouse	Betacoronavirus	Coronaviridae	29646	GenBank	SARS coronavirus MA15 ExoN1 isolate d3om4, complete genome		2008-09-18
JF292906	SARS-CoV	JF292906__SARS-1__USA__Mus__MA15-ExoN1_d3om5	USA	Mus musculus	Mouse	Betacoronavirus	Coronaviridae	29646	GenBank	SARS coronavirus MA15 ExoN1 isolate d3om5, complete genome		2008-09-18
JF292907	SARS-CoV	JF292907__SARS-1__USA__Mus__MA15_d2ym2	USA	Mus musculus	Mouse	Betacoronavirus	Coronaviridae	29646	GenBank	SARS coronavirus MA15 isolate d2ym2, complete genome		2008-08-10
JF292908	SARS-CoV	JF292908__SARS-1__USA__Mus__MA15_d2ym3	USA	Mus musculus	Mouse	Betacoronavirus	Coronaviridae	29646	GenBank	SARS coronavirus MA15 isolate d2ym3, complete genome		2008-08-10
JF292909	SARS-CoV	JF292909__SARS-1__USA__Mus__MA15_d2ym4	USA	Mus musculus	Mouse	Betacoronavirus	Coronaviridae	29646	GenBank	SARS coronavirus MA15 isolate d2ym4, complete genome		2008-08-10
JF292910	SARS-CoV	JF292910__SARS-1__USA__Mus__MA15_d2ym5	USA	Mus musculus	Mouse	Betacoronavirus	Coronaviridae	29646	GenBank	SARS coronavirus MA15 isolate d2ym5, complete genome		2008-08-10
JF292911	SARS-CoV	JF292911__SARS-1__USA__Mus__MA15_d4ym1	USA	Mus musculus	Mouse	Betacoronavirus	Coronaviridae	29646	GenBank	SARS coronavirus MA15 isolate d4ym1, complete genome		2008-10-10
JF292912	SARS-CoV	JF292912__SARS-1__USA__Mus__MA15_d4ym2	USA	Mus musculus	Mouse	Betacoronavirus	Coronaviridae	29646	GenBank	SARS coronavirus MA15 isolate d4ym2, complete genome		2008-10-10
JF292913	SARS-CoV	JF292913__SARS-1__USA__Mus__MA15_d4ym3	USA	Mus musculus	Mouse	Betacoronavirus	Coronaviridae	29646	GenBank	SARS coronavirus MA15 isolate d4ym3, complete genome		2008-10-10
JF292914	SARS-CoV	JF292914__SARS-1__USA__Mus__MA15_d4ym4	USA	Mus musculus	Mouse	Betacoronavirus	Coronaviridae	29646	GenBank	SARS coronavirus MA15 isolate d4ym4, complete genome		2008-10-10
JF292915	SARS-CoV	JF292915__SARS-1__USA__Mus__MA15_d4ym5	USA	Mus musculus	Mouse	Betacoronavirus	Coronaviridae	29646	GenBank	SARS coronavirus MA15 isolate d4ym5, complete genome		2008-10-10
JF292916	SARS-CoV	JF292916__SARS-1__USA__Mus__MA15_d3om1	USA	Mus musculus	Mouse	Betacoronavirus	Coronaviridae	29646	GenBank	SARS coronavirus MA15 isolate d3om1, complete genome		2008-09-19
JF292917	SARS-CoV	JF292917__SARS-1__USA__Mus__MA15_d3om2	USA	Mus musculus	Mouse	Betacoronavirus	Coronaviridae	29646	GenBank	SARS coronavirus MA15 isolate d3om2, complete genome		2008-09-19
JF292918	SARS-CoV	JF292918__SARS-1__USA__Mus__MA15_d3om3	USA	Mus musculus	Mouse	Betacoronavirus	Coronaviridae	29646	GenBank	SARS coronavirus MA15 isolate d3om3, complete genome		2008-09-19
JF292919	SARS-CoV	JF292919__SARS-1__USA__Mus__MA15_d3om4	USA	Mus musculus	Mouse	Betacoronavirus	Coronaviridae	29646	GenBank	SARS coronavirus MA15 isolate d3om4, complete genome		2008-09-19
JF292920	SARS-CoV	JF292920__SARS-1__USA__Mus__MA15_d3om5	USA	Mus musculus	Mouse	Betacoronavirus	Coronaviridae	29646	GenBank	SARS coronavirus MA15 isolate d3om5, complete genome		2008-09-19
JF292921	SARS-CoV	JF292921__SARS-1__USA__NA__wtic-MB_c1P1	USA	Homo sapiens	Human	Betacoronavirus	Coronaviridae	29646	GenBank	SARS coronavirus wtic-MB isolate c1P1, complete genome		2009-03-18
JF292922	SARS-CoV	JF292922__SARS-1__USA__NA__ExoN1_c5P1	USA	Homo sapiens	Human	Betacoronavirus	Coronaviridae	29647	GenBank	SARS coronavirus ExoN1 isolate c5P1, complete genome		2009-03-18
JN854286	SARS-CoV	JN854286__SARS-1__UK__NA__recHKU-39849	United Kingdom	NA	NA	Betacoronavirus	Coronaviridae	29727	GenBank	SARS coronavirus HKU-39849 isolate recSARS-CoV HKU-39849, complete genome		2003-04-16
JQ316196	SARS-CoV	JQ316196__SARS-1__UK__NA__HKU-39849_UOB	United Kingdom	NA	NA	Betacoronavirus	Coronaviridae	29727	GenBank	SARS coronavirus HKU-39849 isolate UOB, complete genome		2003-04-16
JX162087	SARS-CoV	JX162087__SARS-1__USA__NA__ExoN1_c5P10	USA	Homo sapiens	Human	Betacoronavirus	Coronaviridae	29688	GenBank	SARS coronavirus ExoN1 isolate c5P10, complete genome		2009-01-01
JX163923	SARS-CoV	JX163923__SARS-1__USA__NA__Tor2-FP1-10912	USA	Homo sapiens	Human	Betacoronavirus	Coronaviridae	29646	GenBank	SARS coronavirus isolate Tor2/FP1-10912, complete genome		2010-02-10
JX163924	SARS-CoV	JX163924__SARS-1__USA__NA__Tor2-FP1-10851	USA	Homo sapiens	Human	Betacoronavirus	Coronaviridae	29646	GenBank	SARS coronavirus isolate Tor2/FP1-10851, complete genome		2010-02-05
JX163925	SARS-CoV	JX163925__SARS-1__USA__NA__Tor2-FP1-10895	USA	Homo sapiens	Human	Betacoronavirus	Coronaviridae	29646	GenBank	SARS coronavirus isolate Tor2/FP1-10895, complete genome		2010-02-05
JX163926	SARS-CoV	JX163926__SARS-1__USA__NA__Tor2-FP1-10912	USA	Homo sapiens	Human	Betacoronavirus	Coronaviridae	29646	GenBank	SARS coronavirus isolate Tor2/FP1-10912, complete genome		2010-02-10
JX163927	SARS-CoV	JX163927__SARS-1__USA__NA__Tor2-FP1-10851	USA	Homo sapiens	Human	Betacoronavirus	Coronaviridae	29646	GenBank	SARS coronavirus isolate Tor2/FP1-10851, complete genome		2010-02-05
JX163928	SARS-CoV	JX163928__SARS-1__USA__NA__Tor2-FP1-10895	USA	Homo sapiens	Human	Betacoronavirus	Coronaviridae	29646	GenBank	SARS coronavirus isolate Tor2/FP1-10895, complete genome		2010-02-05
JX993987	SARS-CoV	JX993987__SARS-1__China__Bat__Rp-Shaanxi2011	China	Rhinolophus pusillus	BAT	Betacoronavirus	Coronaviridae	29484	GenBank	Bat coronavirus Rp/Shaanxi2011, complete genome		2011-09
JX993988	SARS-CoV	JX993988__SARS-1__China__Bat__Cp-Yunnan2011	China	Chaerephon plicatus	BAT	Betacoronavirus	Coronaviridae	29452	GenBank	Bat coronavirus Cp/Yunnan2011, complete genome		2011
KC881005	SARS-CoV	KC881005__SARS-1__China__Bat__RsSHC014	China	Rhinolophus sinicus	BAT	Betacoronavirus	Coronaviridae	29787	GenBank	Bat SARS-like coronavirus RsSHC014, complete genome		2011-04-17
KC881006	SARS-CoV	KC881006__SARS-1__China__Bat__Rs3367	China	Rhinolophus sinicus	BAT	Betacoronavirus	Coronaviridae	29792	GenBank	Bat SARS-like coronavirus Rs3367, complete genome		2012-03-19
KF367457	SARS-CoV	KF367457__SARS-1__China__Bat__WIV1	China	Rhinolophus sinicus	BAT	Betacoronavirus	Coronaviridae	30309	GenBank	Bat SARS-like coronavirus WIV1, complete genome		2012-09
KF514388	SARS-CoV	KF514388__SARS-1__USA__NA__WTic_c1_5P20-2010	USA	Homo sapiens	Human	Betacoronavirus	Coronaviridae	29687	GenBank	SARS coronavirus wtic-MB strain SARS/VeroE6_lab/USA/WTic_c1.5P20/2010, complete genome		2010-10-01
KF514389	SARS-CoV	KF514389__SARS-1__USA__NA__ExoN1_c8P10-2009	USA	Homo sapiens	Human	Betacoronavirus	Coronaviridae	29687	GenBank	SARS coronavirus ExoN1 strain SARS/VeroE6_lab/USA/ExoN1_c8P10/2009, complete genome		2009-05-19
KF514390	SARS-CoV	KF514390__SARS-1__USA__NA__ExoN1_c5_4P20-2010	USA	Homo sapiens	Human	Betacoronavirus	Coronaviridae	29687	GenBank	SARS coronavirus ExoN1 strain SARS/VeroE6_lab/USA/ExoN1_c5.4P20/2010, complete genome		2010-10-01
KF514391	SARS-CoV	KF514391__SARS-1__USA__NA__ExoN1_c5_9P20-2010	USA	Homo sapiens	Human	Betacoronavirus	Coronaviridae	29687	GenBank	SARS coronavirus ExoN1 strain SARS/VeroE6_lab/USA/ExoN1_c5.9P20/2010, complete genome		2010-10-01
KF514392	SARS-CoV	KF514392__SARS-1__USA__NA__WTic_c1_4P20-2010	USA	Homo sapiens	Human	Betacoronavirus	Coronaviridae	29687	GenBank	SARS coronavirus wtic-MB strain SARS/VeroE6_lab/USA/WTic_c1.4P20/2010, complete genome		2010-10-01
KF514393	SARS-CoV	KF514393__SARS-1__USA__NA__ExoN1_c5_10P20-2010	USA	Homo sapiens	Human	Betacoronavirus	Coronaviridae	29687	GenBank	SARS coronavirus ExoN1 strain SARS/VeroE6_lab/USA/ExoN1_c5.10P20/2010, complete genome		2010-10-01
KF514394	SARS-CoV	KF514394__SARS-1__USA__NA__WTic_c1P20-2009	USA	Homo sapiens	Human	Betacoronavirus	Coronaviridae	29687	GenBank	SARS coronavirus wtic-MB strain SARS/VeroE6_lab/USA/WTic_c1P20/2009, complete genome		2009-07-08
KF514395	SARS-CoV	KF514395__SARS-1__USA__NA__ExoN1_c8P1-2009	USA	Homo sapiens	Human	Betacoronavirus	Coronaviridae	29687	GenBank	SARS coronavirus ExoN1 strain SARS/VeroE6_lab/USA/ExoN1_c8P1/2009, complete genome		2009-03-18
KF514396	SARS-CoV	KF514396__SARS-1__USA__NA__WTic_c3P10-2009	USA	Homo sapiens	Human	Betacoronavirus	Coronaviridae	29687	GenBank	SARS coronavirus wtic-MB strain SARS/VeroE6_lab/USA/WTic_c3P10/2009, complete genome		2009-05-19
KF514397	SARS-CoV	KF514397__SARS-1__USA__NA__WTic_c2P10-2009	USA	Homo sapiens	Human	Betacoronavirus	Coronaviridae	29687	GenBank	SARS coronavirus wtic-MB strain SARS/VeroE6_lab/USA/WTic_c2P10/2009, complete genome		2009-05-19
KF514398	SARS-CoV	KF514398__SARS-1__USA__NA__WTic_c1_10P20-2010	USA	Homo sapiens	Human	Betacoronavirus	Coronaviridae	29687	GenBank	SARS coronavirus wtic-MB strain SARS/VeroE6_lab/USA/WTic_c1.10P20/2010, complete genome		2010-10-01
KF514399	SARS-CoV	KF514399__SARS-1__USA__NA__WTic_c1_1P20-2010	USA	Homo sapiens	Human	Betacoronavirus	Coronaviridae	29687	GenBank	SARS coronavirus wtic-MB strain SARS/VeroE6_lab/USA/WTic_c1.1P20/2010, complete genome		2010-10-01
KF514400	SARS-CoV	KF514400__SARS-1__USA__NA__WTic_c1_8P20-2010	USA	Homo sapiens	Human	Betacoronavirus	Coronaviridae	29687	GenBank	SARS coronavirus wtic-MB strain SARS/VeroE6_lab/USA/WTic_c1.8P20/2010, complete genome		2010-10-01
KF514401	SARS-CoV	KF514401__SARS-1__USA__NA__ExoN1_c5_5P20-2010	USA	Homo sapiens	Human	Betacoronavirus	Coronaviridae	29687	GenBank	SARS coronavirus ExoN1 strain SARS/VeroE6_lab/USA/ExoN1_c5.5P20/2010, complete genome		2010-10-01
KF514402	SARS-CoV	KF514402__SARS-1__USA__NA__ExoN1_c5_6P20-2010	USA	Homo sapiens	Human	Betacoronavirus	Coronaviridae	29687	GenBank	SARS coronavirus ExoN1 strain SARS/VeroE6_lab/USA/ExoN1_c5.6P20/2010, complete genome		2010-10-01
KF514403	SARS-CoV	KF514403__SARS-1__USA__NA__ExoN1_c5_1P20-2010	USA	Homo sapiens	Human	Betacoronavirus	Coronaviridae	29687	GenBank	SARS coronavirus ExoN1 strain SARS/VeroE6_lab/USA/ExoN1_c5.1P20/2010, complete genome		2010-10-01
KF514404	SARS-CoV	KF514404__SARS-1__USA__NA__WTic_c1_9P20-2010	USA	Homo sapiens	Human	Betacoronavirus	Coronaviridae	29687	GenBank	SARS coronavirus wtic-MB strain SARS/VeroE6_lab/USA/WTic_c1.9P20/2010, complete genome		2010-10-01
KF514405	SARS-CoV	KF514405__SARS-1__USA__NA__ExoN1_c5_2P20-2010	USA	Homo sapiens	Human	Betacoronavirus	Coronaviridae	29687	GenBank	SARS coronavirus ExoN1 strain SARS/VeroE6_lab/USA/ExoN1_c5.2P20/2010, complete genome		2010-10-01
KF514406	SARS-CoV	KF514406__SARS-1__USA__NA__ExoN1_c13P1-2009	USA	Homo sapiens	Human	Betacoronavirus	Coronaviridae	29687	GenBank	SARS coronavirus ExoN1 strain SARS/VeroE6_lab/USA/ExoN1_c13P1/2009, complete genome		2009-03-18
KF514407	SARS-CoV	KF514407__SARS-1__USA__NA__ExoN1_c5_7P20-2010	USA	Homo sapiens	Human	Betacoronavirus	Coronaviridae	29689	GenBank	SARS coronavirus ExoN1 strain SARS/VeroE6_lab/USA/ExoN1_c5.7P20/2010, complete genome		2010-10-01
KF514408	SARS-CoV	KF514408__SARS-1__USA__NA__WTic_c2P1-2009	USA	Homo sapiens	Human	Betacoronavirus	Coronaviridae	29687	GenBank	SARS coronavirus wtic-MB strain SARS/VeroE6_lab/USA/WTic_c2P1/2009, complete genome		2009-03-18
KF514409	SARS-CoV	KF514409__SARS-1__USA__NA__WTic_c2P20-2009	USA	Homo sapiens	Human	Betacoronavirus	Coronaviridae	29687	GenBank	SARS coronavirus wtic-MB strain SARS/VeroE6_lab/USA/WTic_c2P20/2009, complete genome		2009-07-08
KF514410	SARS-CoV	KF514410__SARS-1__USA__NA__ExoN1_c8P20-2009	USA	Homo sapiens	Human	Betacoronavirus	Coronaviridae	29687	GenBank	SARS coronavirus ExoN1 strain SARS/VeroE6_lab/USA/ExoN1_c8P20/2009, complete genome		2009-07-08
KF514411	SARS-CoV	KF514411__SARS-1__USA__NA__ExoN1_c13P10-2009	USA	Homo sapiens	Human	Betacoronavirus	Coronaviridae	29687	GenBank	SARS coronavirus ExoN1 strain SARS/VeroE6_lab/USA/ExoN1_c13P10/2009, complete genome		2009-05-19
KF514412	SARS-CoV	KF514412__SARS-1__USA__NA__ExoN1_c13P20-2009	USA	Homo sapiens	Human	Betacoronavirus	Coronaviridae	29687	GenBank	SARS coronavirus ExoN1 strain SARS/VeroE6_lab/USA/ExoN1_c13P20/2009, complete genome		2009-07-08
KF514413	SARS-CoV	KF514413__SARS-1__USA__NA__WTic_c1_6P20-2010	USA	Homo sapiens	Human	Betacoronavirus	Coronaviridae	29687	GenBank	SARS coronavirus wtic-MB strain SARS/VeroE6_lab/USA/WTic_c1.6P20/2010, complete genome		2010-10-01
KF514414	SARS-CoV	KF514414__SARS-1__USA__NA__ExoN1_c5P20-2009	USA	Homo sapiens	Human	Betacoronavirus	Coronaviridae	29687	GenBank	SARS coronavirus ExoN1 strain SARS/VeroE6_lab/USA/ExoN1_c5P20/2009, complete genome		2009-07-08
KF514415	SARS-CoV	KF514415__SARS-1__USA__NA__WTic_c1_7P20-2010	USA	Homo sapiens	Human	Betacoronavirus	Coronaviridae	29687	GenBank	SARS coronavirus wtic-MB strain SARS/VeroE6_lab/USA/WTic_c1.7P20/2010, complete genome		2010-10-01
KF514416	SARS-CoV	KF514416__SARS-1__USA__NA__ExoN1_c5_8P20-2010	USA	Homo sapiens	Human	Betacoronavirus	Coronaviridae	29687	GenBank	SARS coronavirus ExoN1 strain SARS/VeroE6_lab/USA/ExoN1_c5.8P20/2010, complete genome		2010-10-01
KF514417	SARS-CoV	KF514417__SARS-1__USA__NA__ExoN1_c5_3P20-2010	USA	Homo sapiens	Human	Betacoronavirus	Coronaviridae	29687	GenBank	SARS coronavirus ExoN1 strain SARS/VeroE6_lab/USA/ExoN1_c5.3P20/2010, complete genome		2010-10-01
KF514418	SARS-CoV	KF514418__SARS-1__USA__NA__WTic_c3P1-2009	USA	Homo sapiens	Human	Betacoronavirus	Coronaviridae	29687	GenBank	SARS coronavirus wtic-MB strain SARS/VeroE6_lab/USA/WTic_c3P1/2009, complete genome		2009-03-18
KF514419	SARS-CoV	KF514419__SARS-1__USA__NA__WTic_c1P10-2009	USA	Homo sapiens	Human	Betacoronavirus	Coronaviridae	29687	GenBank	SARS coronavirus wtic-MB strain SARS/VeroE6_lab/USA/WTic_c1P10/2009, complete genome		2009-05-19
KF514420	SARS-CoV	KF514420__SARS-1__USA__NA__ExoN1_c5P10-2009	USA	Homo sapiens	Human	Betacoronavirus	Coronaviridae	29687	GenBank	SARS coronavirus ExoN1 strain SARS/VeroE6_lab/USA/ExoN1_c5P10/2009, complete genome		2009-05-19
KF514421	SARS-CoV	KF514421__SARS-1__USA__NA__WTic_c1_2P20-2010	USA	Homo sapiens	Human	Betacoronavirus	Coronaviridae	29687	GenBank	SARS coronavirus wtic-MB strain SARS/VeroE6_lab/USA/WTic_c1.2P20/2010, complete genome		2010-10-01
KF514422	SARS-CoV	KF514422__SARS-1__USA__NA__WTic_c1_3P20-2010	USA	Homo sapiens	Human	Betacoronavirus	Coronaviridae	29687	GenBank	SARS coronavirus wtic-MB strain SARS/VeroE6_lab/USA/WTic_c1.3P20/2010, complete genome		2010-10-01
KF514423	SARS-CoV	KF514423__SARS-1__USA__NA__WTic_c3P20-2009	USA	Homo sapiens	Human	Betacoronavirus	Coronaviridae	29687	GenBank	SARS coronavirus wtic-MB strain SARS/VeroE6_lab/USA/WTic_c3P20/2009, complete genome		2009-07-08
KF569996	SARS-CoV	KF569996__SARS-1__China__Bat__LYRa11	China	Rhinolophus affinis	BAT	Betacoronavirus	Coronaviridae	29805	GenBank	Rhinolophus affinis coronavirus isolate LYRa11, complete genome		2011
KJ473811	SARS-CoV	KJ473811__SARS-1__China__Bat__JL2012	China	Rhinolophus ferrumequinum	BAT	Betacoronavirus	Coronaviridae	29037	GenBank	BtRf-BetaCoV/JL2012, complete genome		2012
KJ473812	SARS-CoV	KJ473812__SARS-1__China__Bat__HeB2013	China	Rhinolophus ferrumequinum	BAT	Betacoronavirus	Coronaviridae	29443	GenBank	BtRf-BetaCoV/HeB2013, complete genome		2013
KJ473813	SARS-CoV	KJ473813__SARS-1__China__Bat__SX2013	China	Rhinolophus ferrumequinum	BAT	Betacoronavirus	Coronaviridae	29461	GenBank	BtRf-BetaCoV/SX2013, complete genome		2013
KJ473814	SARS-CoV	KJ473814__SARS-1__China__Bat__HuB2013	China	Rhinolophus sinicus	BAT	Betacoronavirus	Coronaviridae	29658	GenBank	BtRs-BetaCoV/HuB2013, complete genome		2013
KJ473815	SARS-CoV	KJ473815__SARS-1__China__Bat__GX2013	China	Rhinolophus sinicus	BAT	Betacoronavirus	Coronaviridae	29161	GenBank	BtRs-BetaCoV/GX2013, complete genome		2013
KJ473816	SARS-CoV	KJ473816__SARS-1__China__Bat__YN2013	China	Rhinolophus sinicus	BAT	Betacoronavirus	Coronaviridae	29142	GenBank	BtRs-BetaCoV/YN2013, complete genome		2013
KP886808	SARS-CoV	KP886808__SARS-1__China__Bat__YNLF_31C	China	Rhinolophus ferrumequinum	BAT	Betacoronavirus	Coronaviridae	29723	GenBank	Bat SARS-like coronavirus YNLF_31C, complete genome		2013-05-23
KP886809	SARS-CoV	KP886809__SARS-1__China__Bat__YNLF_34C	China	Rhinolophus ferrumequinum	BAT	Betacoronavirus	Coronaviridae	29723	GenBank	Bat SARS-like coronavirus YNLF_34C, complete genome		2013-05-23
KU973692	SARS-CoV	KU973692__SARS-1__China__Bat__F46	China	Chiroptera	BAT	Betacoronavirus	Coronaviridae	29722	GenBank	UNVERIFIED: SARS-related coronavirus isolate F46, complete genome		2012
KY352407	SARS-CoV	KY352407__SARS-1__Kenya__Bat__KY72	Kenya	Rhinolophus	BAT	Betacoronavirus	Coronaviridae	29274	GenBank	Severe acute respiratory syndrome-related coronavirus strain BtKY72, complete genome	feces	2007-08
KY417142	SARS-CoV	KY417142__SARS-1__China__Bat__As6526	China	Aselliscus stoliczkanus	BAT	Betacoronavirus	Coronaviridae	29725	GenBank	Bat SARS-like coronavirus isolate As6526, complete genome		2014-05-12
KY417143	SARS-CoV	KY417143__SARS-1__China__Bat__Rs4081	China	Rhinolophus sinicus	BAT	Betacoronavirus	Coronaviridae	29741	GenBank	Bat SARS-like coronavirus isolate Rs4081, complete genome		2012-09-18
KY417144	SARS-CoV	KY417144__SARS-1__China__Bat__Rs4084	China	Rhinolophus sinicus	BAT	Betacoronavirus	Coronaviridae	29770	GenBank	Bat SARS-like coronavirus isolate Rs4084, complete genome		2012-09-18
KY417145	SARS-CoV	KY417145__SARS-1__China__Bat__Rf4092	China	Rhinolophus ferrumequinum	BAT	Betacoronavirus	Coronaviridae	29710	GenBank	Bat SARS-like coronavirus isolate Rf4092, complete genome		2012-09-18
KY417146	SARS-CoV	KY417146__SARS-1__China__Bat__Rs4231	China	Rhinolophus sinicus	BAT	Betacoronavirus	Coronaviridae	29782	GenBank	Bat SARS-like coronavirus isolate Rs4231, complete genome		2013-04-17
KY417147	SARS-CoV	KY417147__SARS-1__China__Bat__Rs4237	China	Rhinolophus sinicus	BAT	Betacoronavirus	Coronaviridae	29741	GenBank	Bat SARS-like coronavirus isolate Rs4237, complete genome		2013-04-17
KY417148	SARS-CoV	KY417148__SARS-1__China__Bat__Rs4247	China	Rhinolophus sinicus	BAT	Betacoronavirus	Coronaviridae	29743	GenBank	Bat SARS-like coronavirus isolate Rs4247, complete genome		2013-04-17
KY417149	SARS-CoV	KY417149__SARS-1__China__Bat__Rs4255	China	Rhinolophus sinicus	BAT	Betacoronavirus	Coronaviridae	29743	GenBank	Bat SARS-like coronavirus isolate Rs4255, complete genome		2013-04-17
KY417150	SARS-CoV	KY417150__SARS-1__China__Bat__Rs4874	China	Rhinolophus sinicus	BAT	Betacoronavirus	Coronaviridae	30311	GenBank	Bat SARS-like coronavirus isolate Rs4874, complete genome		2013-07-21
KY417151	SARS-CoV	KY417151__SARS-1__China__Bat__Rs7327	China	Rhinolophus sinicus	BAT	Betacoronavirus	Coronaviridae	30307	GenBank	Bat SARS-like coronavirus isolate Rs7327, complete genome		2014-10-24
KY417152	SARS-CoV	KY417152__SARS-1__China__Bat__Rs9401	China	Rhinolophus sinicus	BAT	Betacoronavirus	Coronaviridae	29769	GenBank	Bat SARS-like coronavirus isolate Rs9401, complete genome		2015-10-16
MG772933	SARS-CoV	MG772933__SARS-1__China__Bat__CoVZC45	China	Rhinolophus sinicus	BAT	Betacoronavirus	Coronaviridae	29802	GenBank	Bat SARS-like coronavirus isolate bat-SL-CoVZC45, complete genome		2017-02
MG772934	SARS-CoV	MG772934__SARS-1__China__Bat__CoVZXC21	China	Rhinolophus sinicus	BAT	Betacoronavirus	Coronaviridae	29732	GenBank	Bat SARS-like coronavirus isolate bat-SL-CoVZXC21, complete genome		2015-07
MK062179	SARS-CoV	MK062179__SARS-1__USA__Hum__Urbani_icSARS	USA	Homo sapiens	Human	Betacoronavirus	Coronaviridae	29727	GenBank	SARS coronavirus Urbani isolate icSARS, complete genome		2017-05-27
MK062180	SARS-CoV	MK062180__SARS-1__USA__Hum__Urbani_icSARS-MA	USA	Homo sapiens	Human	Betacoronavirus	Coronaviridae	29727	GenBank	SARS coronavirus Urbani isolate icSARS-MA, complete genome		2017-05-28
MK062181	SARS-CoV	MK062181__SARS-1__USA__Hum__Urbani_icSARS-C3	USA	Homo sapiens	Human	Betacoronavirus	Coronaviridae	29727	GenBank	SARS coronavirus Urbani isolate icSARS-C3, complete genome		2017-05-29
MK062182	SARS-CoV	MK062182__SARS-1__USA__Hum__Urbani_icSARS-C3-MA	USA	Homo sapiens	Human	Betacoronavirus	Coronaviridae	29727	GenBank	SARS coronavirus Urbani isolate icSARS-C3-MA, complete genome		2017-05-30
MK062183	SARS-CoV	MK062183__SARS-1__USA__Hum__Urbani_icSARS-C7	USA	Homo sapiens	Human	Betacoronavirus	Coronaviridae	29874	GenBank	SARS coronavirus Urbani isolate icSARS-C7, complete genome		2017-05-31
MK062184	SARS-CoV	MK062184__SARS-1__USA__Hum__Urbani_icSARS-C7-MA	USA	Homo sapiens	Human	Betacoronavirus	Coronaviridae	29874	GenBank	SARS coronavirus Urbani isolate icSARS-C7-MA, complete genome		2017-06-01
MN996532	SARS-CoV	MN996532__SARS-1__China__Bat__RaTG13	China	Rhinolophus affinis	BAT	Betacoronavirus	Coronaviridae	29855	GenBank	Bat coronavirus RaTG13, complete genome	feces	2013-07-24
MT226610	SARS-CoV	MT226610__SARS-2__China__Hum__KMS1	China	Homo sapiens	Human	Betacoronavirus	Coronaviridae	29899	GenBank	Severe acute respiratory syndrome-related coronavirus isolate SARS-CoV-2/KMS1/human/2020/CHN, complete genome	oronasopharynx	2020-01-20
NC_004718	SARS-CoV	NC_004718__SARS-1__Canada__Hum__Tor2	Canada	Human	Human	Betacoronavirus	Coronaviridae	29751	RefSeq	SARS coronavirus, complete genome	blood
LC528232	SARS-CoV-2	LC528232__SARS-2__NA__Hum__Hu-DP-Kng-19-020-RNA	Japan	Homo sapiens	Human	Betacoronavirus	Coronaviridae	29902	GenBank	Severe acute respiratory syndrome coronavirus 2 SARS-CoV-2/Hu/DP/Kng/19-020 RNA, complete genome	oronasopharynx	2020-02-10
LC528233	SARS-CoV-2	LC528233__SARS-2__NA__Hum__Hu-DP-Kng-19-027-RNA	Japan	Homo sapiens	Human	Betacoronavirus	Coronaviridae	29902	GenBank	Severe acute respiratory syndrome coronavirus 2 SARS-CoV-2/Hu/DP/Kng/19-027 RNA, complete genome	oronasopharynx	2020-02-10
LC529905	SARS-CoV-2	LC529905__SARS-2__Japan__Hum__TKYE6182	Japan	Homo sapiens	Human	Betacoronavirus	Coronaviridae	29903	GenBank	Severe acute respiratory syndrome coronavirus 2 TKYE6182_2020 RNA, complete genome		2020-01
LR757995	SARS-CoV-2	LR757995__SARS-2__China__Hum__seafood-market	China	Homo sapiens	Human	Betacoronavirus	Coronaviridae	29872	GenBank	Wuhan seafood market pneumonia virus genome assembly, chromosome: whole_genome		2019-12-26
LR757996	SARS-CoV-2	LR757996__SARS-2__China__Hum__seafood-market	China	Homo sapiens	Human	Betacoronavirus	Coronaviridae	29868	GenBank	Wuhan seafood market pneumonia virus genome assembly, chromosome: whole_genome		2020-01-01
LR757998	SARS-CoV-2	LR757998__SARS-2__China__Hum__seafood-market	China	Homo sapiens	Human	Betacoronavirus	Coronaviridae	29866	GenBank	Wuhan seafood market pneumonia virus genome assembly, chromosome: whole_genome		2019-12-26
MN938384	SARS-CoV-2	MN938384__SARS-2__China__Hum__SZ-002a_2020	China	Homo sapiens	Human	Betacoronavirus	Coronaviridae	29838	GenBank	Severe acute respiratory syndrome coronavirus 2 isolate 2019-nCoV_HKU-SZ-002a_2020, complete genome	oronasopharynx	2020-01-10
MN975262	SARS-CoV-2	MN975262__SARS-2__China__Hum__SZ-005b_2020	China	Homo sapiens	Human	Betacoronavirus	Coronaviridae	29891	GenBank	Severe acute respiratory syndrome coronavirus 2 isolate 2019-nCoV_HKU-SZ-005b_2020, complete genome	lung, oronasopharynx	2020-01-11
MN985325	SARS-CoV-2	MN985325__SARS-2__USA__Hum__WA1	USA	Homo sapiens	Human	Betacoronavirus	Coronaviridae	29882	GenBank	Severe acute respiratory syndrome coronavirus 2 isolate 2019-nCoV/USA-WA1/2020, complete genome	oronasopharynx	2020-01-19
MN988668	SARS-CoV-2	MN988668__SARS-2__China__Hum__WHU01	China	Homo sapiens	Human	Betacoronavirus	Coronaviridae	29881	GenBank	Severe acute respiratory syndrome coronavirus 2 isolate 2019-nCoV WHU01, complete genome		2020-01-02
MN988669	SARS-CoV-2	MN988669__SARS-2__China__Hum__WHU02	China	Homo sapiens	Human	Betacoronavirus	Coronaviridae	29881	GenBank	Severe acute respiratory syndrome coronavirus 2 isolate 2019-nCoV WHU02, complete genome		2020-01-02
MN988713	SARS-CoV-2	MN988713__SARS-2__USA__Hum__IL1	USA	Homo sapiens	Human	Betacoronavirus	Coronaviridae	29882	GenBank	Severe acute respiratory syndrome coronavirus 2 isolate 2019-nCoV/USA-IL1/2020, complete genome	lung, oronasopharynx	2020-01-21
MN994467	SARS-CoV-2	MN994467__SARS-2__USA__Hum__CA1	USA	Homo sapiens	Human	Betacoronavirus	Coronaviridae	29882	GenBank	Severe acute respiratory syndrome coronavirus 2 isolate 2019-nCoV/USA-CA1/2020, complete genome	oronasopharynx	2020-01-23
MN994468	SARS-CoV-2	MN994468__SARS-2__USA__Hum__CA2	USA	Homo sapiens	Human	Betacoronavirus	Coronaviridae	29883	GenBank	Severe acute respiratory syndrome coronavirus 2 isolate 2019-nCoV/USA-CA2/2020, complete genome	oronasopharynx	2020-01-22
MN996527	SARS-CoV-2	MN996527__SARS-2__China__Hum__WIV02	China	Homo sapiens	Human	Betacoronavirus	Coronaviridae	29825	GenBank	Severe acute respiratory syndrome coronavirus 2 isolate WIV02, complete genome	lung	2019-12-30
MN996528	SARS-CoV-2	MN996528__SARS-2__China__Hum__WIV04	China	Homo sapiens	Human	Betacoronavirus	Coronaviridae	29891	GenBank	Severe acute respiratory syndrome coronavirus 2 isolate WIV04, complete genome	lung	2019-12-30
MN996529	SARS-CoV-2	MN996529__SARS-2__China__Hum__WIV05	China	Homo sapiens	Human	Betacoronavirus	Coronaviridae	29852	GenBank	Severe acute respiratory syndrome coronavirus 2 isolate WIV05, complete genome	lung	2019-12-30
MN996530	SARS-CoV-2	MN996530__SARS-2__China__Hum__WIV06	China	Homo sapiens	Human	Betacoronavirus	Coronaviridae	29854	GenBank	Severe acute respiratory syndrome coronavirus 2 isolate WIV06, complete genome	lung	2019-12-30
MN996531	SARS-CoV-2	MN996531__SARS-2__China__Hum__WIV07	China	Homo sapiens	Human	Betacoronavirus	Coronaviridae	29857	GenBank	Severe acute respiratory syndrome coronavirus 2 isolate WIV07, complete genome	lung	2019-12-30
MN997409	SARS-CoV-2	MN997409__SARS-2__USA__Hum__AZ1	USA	Homo sapiens	Human	Betacoronavirus	Coronaviridae	29882	GenBank	Severe acute respiratory syndrome coronavirus 2 isolate 2019-nCoV/USA-AZ1/2020, complete genome	feces	2020-01-22
MT007544	SARS-CoV-2	MT007544__SARS-2__Australia__Hum__VIC01	Australia	Homo sapiens	Human	Betacoronavirus	Coronaviridae	29893	GenBank	Severe acute respiratory syndrome coronavirus 2 isolate Australia/VIC01/2020, complete genome		2020-01-25
MT012098	SARS-CoV-2	MT012098__SARS-2__India__Hum__29	India	Homo sapiens	Human	Betacoronavirus	Coronaviridae	29854	GenBank	Severe acute respiratory syndrome coronavirus 2 isolate SARS-CoV-2/29/human/2020/IND, complete genome	oronasopharynx	2020-01-27
MT019529	SARS-CoV-2	MT019529__SARS-2__China__Hum__WH-01-2019	China	Homo sapiens	Human	Betacoronavirus	Coronaviridae	29899	GenBank	Severe acute respiratory syndrome coronavirus 2 isolate BetaCoV/Wuhan/IPBCAMS-WH-01/2019, complete genome	lung	2019-12-23
MT019530	SARS-CoV-2	MT019530__SARS-2__China__Hum__WH-02-2019	China	Homo sapiens	Human	Betacoronavirus	Coronaviridae	29889	GenBank	Severe acute respiratory syndrome coronavirus 2 isolate BetaCoV/Wuhan/IPBCAMS-WH-02/2019, complete genome	lung	2019-12-30
MT019531	SARS-CoV-2	MT019531__SARS-2__China__Hum__WH-03-2019	China	Homo sapiens	Human	Betacoronavirus	Coronaviridae	29899	GenBank	Severe acute respiratory syndrome coronavirus 2 isolate BetaCoV/Wuhan/IPBCAMS-WH-03/2019, complete genome	lung	2019-12-30
MT019532	SARS-CoV-2	MT019532__SARS-2__China__Hum__WH-04-2019	China	Homo sapiens	Human	Betacoronavirus	Coronaviridae	29890	GenBank	Severe acute respiratory syndrome coronavirus 2 isolate BetaCoV/Wuhan/IPBCAMS-WH-04/2019, complete genome	lung	2019-12-30
MT019533	SARS-CoV-2	MT019533__SARS-2__China__Hum__WH-05	China	Homo sapiens	Human	Betacoronavirus	Coronaviridae	29883	GenBank	Severe acute respiratory syndrome coronavirus 2 isolate BetaCoV/Wuhan/IPBCAMS-WH-05/2020, complete genome	lung	2020-01-01
MT020781	SARS-CoV-2	MT020781__SARS-2__Finland__Hum__Jan29	Finland	Homo sapiens	Human	Betacoronavirus	Coronaviridae	29806	GenBank	Severe acute respiratory syndrome coronavirus 2 isolate nCoV-FIN-29-Jan-2020, partial genome		2020-01-29
MT020880	SARS-CoV-2	MT020880__SARS-2__USA__Hum__WA1-A12	USA	Homo sapiens	Human	Betacoronavirus	Coronaviridae	29882	GenBank	Severe acute respiratory syndrome coronavirus 2 isolate 2019-nCoV/USA-WA1-A12/2020, complete genome	oronasopharynx	2020-01-25
MT020881	SARS-CoV-2	MT020881__SARS-2__USA__Hum__WA1-F6	USA	Homo sapiens	Human	Betacoronavirus	Coronaviridae	29882	GenBank	Severe acute respiratory syndrome coronavirus 2 isolate 2019-nCoV/USA-WA1-F6/2020, complete genome	oronasopharynx	2020-01-25
MT027062	SARS-CoV-2	MT027062__SARS-2__USA__Hum__CA3	USA	Homo sapiens	Human	Betacoronavirus	Coronaviridae	29882	GenBank	Severe acute respiratory syndrome coronavirus 2 isolate 2019-nCoV/USA-CA3/2020, complete genome	oronasopharynx	2020-01-29
MT027063	SARS-CoV-2	MT027063__SARS-2__USA__Hum__CA4	USA	Homo sapiens	Human	Betacoronavirus	Coronaviridae	29882	GenBank	Severe acute respiratory syndrome coronavirus 2 isolate 2019-nCoV/USA-CA4/2020, complete genome	oronasopharynx	2020-01-29
MT027064	SARS-CoV-2	MT027064__SARS-2__USA__Hum__CA5	USA	Homo sapiens	Human	Betacoronavirus	Coronaviridae	29882	GenBank	Severe acute respiratory syndrome coronavirus 2 isolate 2019-nCoV/USA-CA5/2020, complete genome	oronasopharynx	2020-01-29
MT039873	SARS-CoV-2	MT039873__SARS-2__China__Hum__HZ-1	China	Homo sapiens	Human	Betacoronavirus	Coronaviridae	29833	GenBank	Severe acute respiratory syndrome coronavirus 2 isolate HZ-1, complete genome	lung, oronasopharynx	2020-01-20
MT039887	SARS-CoV-2	MT039887__SARS-2__USA__Hum__WI1	USA	Homo sapiens	Human	Betacoronavirus	Coronaviridae	29879	GenBank	Severe acute respiratory syndrome coronavirus 2 isolate 2019-nCoV/USA-WI1/2020, complete genome	oronasopharynx	2020-01-31
MT039888	SARS-CoV-2	MT039888__SARS-2__USA__Hum__MA1	USA	Homo sapiens	Human	Betacoronavirus	Coronaviridae	29882	GenBank	Severe acute respiratory syndrome coronavirus 2 isolate 2019-nCoV/USA-MA1/2020, complete genome	oronasopharynx	2020-01-29
MT039890	SARS-CoV-2	MT039890__SARS-2__SouthKorea__Hum__SNU01	South Korea	Homo sapiens	Human	Betacoronavirus	Coronaviridae	29903	GenBank	Severe acute respiratory syndrome coronavirus 2 isolate SNU01, complete genome		2020-01
MT044257	SARS-CoV-2	MT044257__SARS-2__USA__Hum__IL2	USA	Homo sapiens	Human	Betacoronavirus	Coronaviridae	29882	GenBank	Severe acute respiratory syndrome coronavirus 2 isolate 2019-nCoV/USA-IL2/2020, complete genome	lung, oronasopharynx	2020-01-28
MT044258	SARS-CoV-2	MT044258__SARS-2__USA__Hum__CA6	USA	Homo sapiens	Human	Betacoronavirus	Coronaviridae	29858	GenBank	Severe acute respiratory syndrome coronavirus 2 isolate 2019-nCoV/USA-CA6/2020, complete genome	oronasopharynx	2020-01-27
MT049951	SARS-CoV-2	MT049951__SARS-2__China__Hum__Yunnan-01	China	Homo sapiens	Human	Betacoronavirus	Coronaviridae	29903	GenBank	Severe acute respiratory syndrome coronavirus 2 isolate SARS-CoV-2/Yunnan-01/human/2020/CHN, complete genome	lung, oronasopharynx	2020-01-17
MT050493	SARS-CoV-2	MT050493__SARS-2__India__Hum__166	India	Homo sapiens	Human	Betacoronavirus	Coronaviridae	29851	GenBank	Severe acute respiratory syndrome coronavirus 2 isolate SARS-CoV-2/166/human/2020/IND, complete genome	oronasopharynx	2020-01-31
MT066156	SARS-CoV-2	MT066156__SARS-2__Italy__Hum__INMI1	Italy	Homo sapiens	Human	Betacoronavirus	Coronaviridae	29867	GenBank	Severe acute respiratory syndrome coronavirus 2 isolate SARS-CoV-2/INMI1/human/2020/ITA, complete genome	lung, oronasopharynx	2020-01-30
MT066175	SARS-CoV-2	MT066175__SARS-2__Taiwan__Hum__NTU01	Taiwan	Homo sapiens	Human	Betacoronavirus	Coronaviridae	29870	GenBank	Severe acute respiratory syndrome coronavirus 2 isolate SARS-CoV-2/NTU01/2020/TWN, complete genome		2020-01-31
MT066176	SARS-CoV-2	MT066176__SARS-2__Taiwan__Hum__NTU02	Taiwan	Homo sapiens	Human	Betacoronavirus	Coronaviridae	29870	GenBank	Severe acute respiratory syndrome coronavirus 2 isolate SARS-CoV-2/NTU02/2020/TWN, complete genome		2020-02-05
MT072688	SARS-CoV-2	MT072688__SARS-2__Nepal__Hum__61-TW	Nepal	Homo sapiens	Human	Betacoronavirus	Coronaviridae	29811	GenBank	Severe acute respiratory syndrome coronavirus 2 isolate SARS0CoV-2/61-TW/human/2020/ NPL, complete genome	oronasopharynx	2020-01-13
MT093571	SARS-CoV-2	MT093571__SARS-2__Sweden__Hum__01	Sweden	Homo sapiens	Human	Betacoronavirus	Coronaviridae	29886	GenBank	Severe acute respiratory syndrome coronavirus 2 isolate SARS-CoV-2/01/human/2020/SWE, complete genome		2020-02-07
MT093631	SARS-CoV-2	MT093631__SARS-2__China__Hum__WH-09	China	Homo sapiens	Human	Betacoronavirus	Coronaviridae	29860	GenBank	Severe acute respiratory syndrome coronavirus 2 isolate SARS-CoV-2/WH-09/human/2020/CHN, complete genome	oronasopharynx	2020-01-08
MT106052	SARS-CoV-2	MT106052__SARS-2__USA__Hum__CA7	USA	Homo sapiens	Human	Betacoronavirus	Coronaviridae	29882	GenBank	Severe acute respiratory syndrome coronavirus 2 isolate 2019-nCoV/USA-CA7/2020, complete genome	oronasopharynx	2020-02-06
MT106053	SARS-CoV-2	MT106053__SARS-2__USA__Hum__CA8	USA	Homo sapiens	Human	Betacoronavirus	Coronaviridae	29882	GenBank	Severe acute respiratory syndrome coronavirus 2 isolate 2019-nCoV/USA-CA8/2020, complete genome	oronasopharynx	2020-02-10
MT106054	SARS-CoV-2	MT106054__SARS-2__USA__Hum__TX1	USA	Homo sapiens	Human	Betacoronavirus	Coronaviridae	29882	GenBank	Severe acute respiratory syndrome coronavirus 2 isolate 2019-nCoV/USA-TX1/2020, complete genome	lung, oronasopharynx	2020-02-11
MT118835	SARS-CoV-2	MT118835__SARS-2__USA__Hum__CA9	USA	Homo sapiens	Human	Betacoronavirus	Coronaviridae	29882	GenBank	Severe acute respiratory syndrome coronavirus 2 isolate 2019-nCoV/USA-CA9/2020, complete genome	lung	2020-02-23
MT121215	SARS-CoV-2	MT121215__SARS-2__China__Hum__SH01	China	Homo sapiens	Human	Betacoronavirus	Coronaviridae	29945	GenBank	Severe acute respiratory syndrome coronavirus 2 isolate SARS-CoV-2/SH01/human/2020/CHN, complete genome	oronasopharynx	2020-02-02
MT123290	SARS-CoV-2	MT123290__SARS-2__China__Hum__IQTC01	China	Homo sapiens	Human	Betacoronavirus	Coronaviridae	29891	GenBank	Severe acute respiratory syndrome coronavirus 2 isolate SARS-CoV-2/IQTC01/human/2020/CHN, complete genome	oronasopharynx	2020-02-05
MT123291	SARS-CoV-2	MT123291__SARS-2__China__Hum__IQTC02	China	Homo sapiens	Human	Betacoronavirus	Coronaviridae	29882	GenBank	Severe acute respiratory syndrome coronavirus 2 isolate SARS-CoV-2/IQTC02/human/2020/CHN, complete genome	lung	2020-01-29
MT123292	SARS-CoV-2	MT123292__SARS-2__China__Hum__IQTC04	China	Homo sapiens	Human	Betacoronavirus	Coronaviridae	29923	GenBank	Severe acute respiratory syndrome coronavirus 2 isolate SARS-CoV-2/IQTC04/human/2020/CHN, complete genome	lung, oronasopharynx	2020-01-27
MT123293	SARS-CoV-2	MT123293__SARS-2__China__Hum__IQTC03	China	Homo sapiens	Human	Betacoronavirus	Coronaviridae	29871	GenBank	Severe acute respiratory syndrome coronavirus 2 isolate SARS-CoV-2/IQTC03/human/2020/CHN, complete genome	feces	2020-01-29
MT126808	SARS-CoV-2	MT126808__SARS-2__Brazil__Hum__SP02	Brazil	Homo sapiens	Human	Betacoronavirus	Coronaviridae	29876	GenBank	Severe acute respiratory syndrome coronavirus 2 isolate SARS-CoV-2/SP02/human/2020/BRA, complete genome	oronasopharynx	2020-02-28
MT135041	SARS-CoV-2	MT135041__SARS-2__China__Hum__105	China	Homo sapiens	Human	Betacoronavirus	Coronaviridae	29903	GenBank	Severe acute respiratory syndrome coronavirus 2 isolate SARS-CoV-2/105/human/2020/CHN, complete genome		2020-01-26
MT135042	SARS-CoV-2	MT135042__SARS-2__China__Hum__231	China	Homo sapiens	Human	Betacoronavirus	Coronaviridae	29903	GenBank	Severe acute respiratory syndrome coronavirus 2 isolate SARS-CoV-2/231/human/2020/CHN, complete genome		2020-01-28
MT135043	SARS-CoV-2	MT135043__SARS-2__China__Hum__233	China	Homo sapiens	Human	Betacoronavirus	Coronaviridae	29903	GenBank	Severe acute respiratory syndrome coronavirus 2 isolate SARS-CoV-2/233/human/2020/CHN, complete genome		2020-01-28
MT135044	SARS-CoV-2	MT135044__SARS-2__China__Hum__235	China	Homo sapiens	Human	Betacoronavirus	Coronaviridae	29903	GenBank	Severe acute respiratory syndrome coronavirus 2 isolate SARS-CoV-2/235/human/2020/CHN, complete genome		2020-01-28
MT152824	SARS-CoV-2	MT152824__SARS-2__USA__Hum__WA2	USA	Homo sapiens	Human	Betacoronavirus	Coronaviridae	29878	GenBank	Severe acute respiratory syndrome coronavirus 2 isolate SARS-CoV-2/WA2/human/2020/USA, complete genome		2020-02-24
MT159705	SARS-CoV-2	MT159705__SARS-2__USA__Hum__CruiseA-7	USA	Homo sapiens	Human	Betacoronavirus	Coronaviridae	29882	GenBank	Severe acute respiratory syndrome coronavirus 2 isolate 2019-nCoV/USA-CruiseA-7/2020, complete genome	oronasopharynx	2020-02-17
MT159706	SARS-CoV-2	MT159706__SARS-2__USA__Hum__CruiseA-8	USA	Homo sapiens	Human	Betacoronavirus	Coronaviridae	29882	GenBank	Severe acute respiratory syndrome coronavirus 2 isolate 2019-nCoV/USA-CruiseA-8/2020, complete genome	oronasopharynx	2020-02-17
MT159707	SARS-CoV-2	MT159707__SARS-2__USA__Hum__CruiseA-10	USA	Homo sapiens	Human	Betacoronavirus	Coronaviridae	29882	GenBank	Severe acute respiratory syndrome coronavirus 2 isolate 2019-nCoV/USA-CruiseA-10/2020, complete genome	oronasopharynx	2020-02-17
MT159708	SARS-CoV-2	MT159708__SARS-2__USA__Hum__CruiseA-11	USA	Homo sapiens	Human	Betacoronavirus	Coronaviridae	29882	GenBank	Severe acute respiratory syndrome coronavirus 2 isolate 2019-nCoV/USA-CruiseA-11/2020, complete genome	oronasopharynx	2020-02-17
MT159709	SARS-CoV-2	MT159709__SARS-2__USA__Hum__CruiseA-12	USA	Homo sapiens	Human	Betacoronavirus	Coronaviridae	29882	GenBank	Severe acute respiratory syndrome coronavirus 2 isolate 2019-nCoV/USA-CruiseA-12/2020, complete genome	oronasopharynx	2020-02-20
MT159710	SARS-CoV-2	MT159710__SARS-2__USA__Hum__CruiseA-9	USA	Homo sapiens	Human	Betacoronavirus	Coronaviridae	29882	GenBank	Severe acute respiratory syndrome coronavirus 2 isolate 2019-nCoV/USA-CruiseA-9/2020, complete genome	oronasopharynx	2020-02-17
MT159711	SARS-CoV-2	MT159711__SARS-2__USA__Hum__CruiseA-13	USA	Homo sapiens	Human	Betacoronavirus	Coronaviridae	29882	GenBank	Severe acute respiratory syndrome coronavirus 2 isolate 2019-nCoV/USA-CruiseA-13/2020, complete genome	oronasopharynx	2020-02-20
MT159712	SARS-CoV-2	MT159712__SARS-2__USA__Hum__CruiseA-14	USA	Homo sapiens	Human	Betacoronavirus	Coronaviridae	29882	GenBank	Severe acute respiratory syndrome coronavirus 2 isolate 2019-nCoV/USA-CruiseA-14/2020, complete genome	oronasopharynx	2020-02-25
MT159713	SARS-CoV-2	MT159713__SARS-2__USA__Hum__CruiseA-15	USA	Homo sapiens	Human	Betacoronavirus	Coronaviridae	29882	GenBank	Severe acute respiratory syndrome coronavirus 2 isolate 2019-nCoV/USA-CruiseA-15/2020, complete genome	oronasopharynx	2020-02-18
MT159714	SARS-CoV-2	MT159714__SARS-2__USA__Hum__CruiseA-16	USA	Homo sapiens	Human	Betacoronavirus	Coronaviridae	29882	GenBank	Severe acute respiratory syndrome coronavirus 2 isolate 2019-nCoV/USA-CruiseA-16/2020, complete genome	oronasopharynx	2020-02-18
MT159715	SARS-CoV-2	MT159715__SARS-2__USA__Hum__CruiseA-17	USA	Homo sapiens	Human	Betacoronavirus	Coronaviridae	29882	GenBank	Severe acute respiratory syndrome coronavirus 2 isolate 2019-nCoV/USA-CruiseA-17/2020, complete genome	oronasopharynx	2020-02-24
MT159716	SARS-CoV-2	MT159716__SARS-2__USA__Hum__CruiseA-18	USA	Homo sapiens	Human	Betacoronavirus	Coronaviridae	29867	GenBank	Severe acute respiratory syndrome coronavirus 2 isolate 2019-nCoV/USA-CruiseA-18/2020, complete genome	oronasopharynx	2020-02-24
MT159717	SARS-CoV-2	MT159717__SARS-2__USA__Hum__CruiseA-1	USA	Homo sapiens	Human	Betacoronavirus	Coronaviridae	29882	GenBank	Severe acute respiratory syndrome coronavirus 2 isolate 2019-nCoV/USA-CruiseA-1/2020, complete genome	oronasopharynx	2020-02-17
MT159718	SARS-CoV-2	MT159718__SARS-2__USA__Hum__CruiseA-2	USA	Homo sapiens	Human	Betacoronavirus	Coronaviridae	29882	GenBank	Severe acute respiratory syndrome coronavirus 2 isolate 2019-nCoV/USA-CruiseA-2/2020, complete genome	oronasopharynx	2020-02-18
MT159719	SARS-CoV-2	MT159719__SARS-2__USA__Hum__CruiseA-3	USA	Homo sapiens	Human	Betacoronavirus	Coronaviridae	29882	GenBank	Severe acute respiratory syndrome coronavirus 2 isolate 2019-nCoV/USA-CruiseA-3/2020, complete genome	oronasopharynx	2020-02-18
MT159720	SARS-CoV-2	MT159720__SARS-2__USA__Hum__CruiseA-4	USA	Homo sapiens	Human	Betacoronavirus	Coronaviridae	29882	GenBank	Severe acute respiratory syndrome coronavirus 2 isolate 2019-nCoV/USA-CruiseA-4/2020, complete genome	oronasopharynx	2020-02-21
MT159721	SARS-CoV-2	MT159721__SARS-2__USA__Hum__CruiseA-5	USA	Homo sapiens	Human	Betacoronavirus	Coronaviridae	29882	GenBank	Severe acute respiratory syndrome coronavirus 2 isolate 2019-nCoV/USA-CruiseA-5/2020, complete genome	oronasopharynx	2020-02-21
MT159722	SARS-CoV-2	MT159722__SARS-2__USA__Hum__CruiseA-6	USA	Homo sapiens	Human	Betacoronavirus	Coronaviridae	29882	GenBank	Severe acute respiratory syndrome coronavirus 2 isolate 2019-nCoV/USA-CruiseA-6/2020, complete genome	oronasopharynx	2020-02-21
MT163716	SARS-CoV-2	MT163716__SARS-2__USA__Hum__WA3-UW1	USA	Homo sapiens	Human	Betacoronavirus	Coronaviridae	29903	GenBank	Severe acute respiratory syndrome coronavirus 2 isolate SARS-CoV-2/WA3-UW1/human/2020/USA, complete genome		2020-02-27
MT163717	SARS-CoV-2	MT163717__SARS-2__USA__Hum__WA4-UW2	USA	Homo sapiens	Human	Betacoronavirus	Coronaviridae	29897	GenBank	Severe acute respiratory syndrome coronavirus 2 isolate SARS-CoV-2/WA4-UW2/human/2020/USA, complete genome		2020-02-28
MT163718	SARS-CoV-2	MT163718__SARS-2__USA__Hum__WA6-UW3	USA	Homo sapiens	Human	Betacoronavirus	Coronaviridae	29903	GenBank	Severe acute respiratory syndrome coronavirus 2 isolate SARS-CoV-2/WA6-UW3/human/2020/USA, complete genome		2020-02-29
MT163719	SARS-CoV-2	MT163719__SARS-2__USA__Hum__WA7-UW4	USA	Homo sapiens	Human	Betacoronavirus	Coronaviridae	29903	GenBank	Severe acute respiratory syndrome coronavirus 2 isolate SARS-CoV-2/WA7-UW4/human/2020/USA, complete genome		2020-03-01
MT163720	SARS-CoV-2	MT163720__SARS-2__USA__Hum__WA8-UW5	USA	Homo sapiens	Human	Betacoronavirus	Coronaviridae	29732	GenBank	Severe acute respiratory syndrome coronavirus 2 isolate SARS-CoV-2/WA8-UW5/human/2020/USA, partial genome		2020-03-01
MT163721	SARS-CoV-2	MT163721__SARS-2__USA__Hum__WA9-UW6	USA	Homo sapiens	Human	Betacoronavirus	Coronaviridae	29325	GenBank	Severe acute respiratory syndrome coronavirus 2 isolate SARS-CoV-2/WA9-UW6/human/2020/USA, partial genome		2020-03-01
MT184907	SARS-CoV-2	MT184907__SARS-2__USA__Hum__CruiseA-19	USA	Homo sapiens	Human	Betacoronavirus	Coronaviridae	29882	GenBank	Severe acute respiratory syndrome coronavirus 2 isolate 2019-nCoV/USA-CruiseA-19/2020, complete genome	oronasopharynx	2020-02-18
MT184908	SARS-CoV-2	MT184908__SARS-2__USA__Hum__CruiseA-21	USA	Homo sapiens	Human	Betacoronavirus	Coronaviridae	29880	GenBank	Severe acute respiratory syndrome coronavirus 2 isolate 2019-nCoV/USA-CruiseA-21/2020, complete genome	oronasopharynx	2020-02-21
MT184909	SARS-CoV-2	MT184909__SARS-2__USA__Hum__CruiseA-22	USA	Homo sapiens	Human	Betacoronavirus	Coronaviridae	29882	GenBank	Severe acute respiratory syndrome coronavirus 2 isolate 2019-nCoV/USA-CruiseA-22/2020, complete genome	oronasopharynx	2020-02-21
MT184910	SARS-CoV-2	MT184910__SARS-2__USA__Hum__CruiseA-23	USA	Homo sapiens	Human	Betacoronavirus	Coronaviridae	29882	GenBank	Severe acute respiratory syndrome coronavirus 2 isolate 2019-nCoV/USA-CruiseA-23/2020, complete genome	oronasopharynx	2020-02-18
MT184911	SARS-CoV-2	MT184911__SARS-2__USA__Hum__CruiseA-24	USA	Homo sapiens	Human	Betacoronavirus	Coronaviridae	29882	GenBank	Severe acute respiratory syndrome coronavirus 2 isolate 2019-nCoV/USA-CruiseA-24/2020, complete genome	oronasopharynx	2020-02-17
MT184912	SARS-CoV-2	MT184912__SARS-2__USA__Hum__CruiseA-25	USA	Homo sapiens	Human	Betacoronavirus	Coronaviridae	29882	GenBank	Severe acute respiratory syndrome coronavirus 2 isolate 2019-nCoV/USA-CruiseA-25/2020, complete genome	oronasopharynx	2020-02-17
MT184913	SARS-CoV-2	MT184913__SARS-2__USA__Hum__CruiseA-26	USA	Homo sapiens	Human	Betacoronavirus	Coronaviridae	29882	GenBank	Severe acute respiratory syndrome coronavirus 2 isolate 2019-nCoV/USA-CruiseA-26/2020, complete genome	oronasopharynx	2020-02-24
MT188339	SARS-CoV-2	MT188339__SARS-2__USA__Hum__MN3-MDH3	USA	Homo sapiens	Human	Betacoronavirus	Coronaviridae	29783	GenBank	Severe acute respiratory syndrome coronavirus 2 isolate USA/MN3-MDH3/2020, complete genome		2020-03-09
MT188340	SARS-CoV-2	MT188340__SARS-2__USA__Hum__MN2-MDH2	USA	Homo sapiens	Human	Betacoronavirus	Coronaviridae	29845	GenBank	Severe acute respiratory syndrome coronavirus 2 isolate USA/MN2-MDH2/2020, complete genome		2020-03-07
MT188341	SARS-CoV-2	MT188341__SARS-2__USA__Hum__MN1-MDH1	USA	Homo sapiens	Human	Betacoronavirus	Coronaviridae	29835	GenBank	Severe acute respiratory syndrome coronavirus 2 isolate USA/MN1-MDH1/2020, complete genome		2020-03-05
MT192759	SARS-CoV-2	MT192759__SARS-2__Taiwan__Hum__CGMH-CGU-01	Taiwan	Homo sapiens	Human	Betacoronavirus	Coronaviridae	29862	GenBank	Severe acute respiratory syndrome coronavirus 2 isolate SARS-CoV-2/CGMH-CGU-01/human2020/TWN, complete genome	lung, oronasopharynx	2020-01-25
MT192765	SARS-CoV-2	MT192765__SARS-2__USA__Hum__PC00101P	USA	Homo sapiens	Human	Betacoronavirus	Coronaviridae	29829	GenBank	Severe acute respiratory syndrome coronavirus 2 isolate SARS-CoV-2/PC00101P/human/2020/USA, complete genome		2020-03-11
MT192772	SARS-CoV-2	MT192772__SARS-2__VietNam__Hum__nCoV-19-01S	Viet Nam	Homo sapiens	Human	Betacoronavirus	Coronaviridae	29891	GenBank	Severe acute respiratory syndrome coronavirus 2 isolate SARS-CoV-2/nCoV-19-01S/human/2020/VNM, complete genome		2020-01-22
MT192773	SARS-CoV-2	MT192773__SARS-2__VietNam__Hum__nCoV-19-02S	Viet Nam	Homo sapiens	Human	Betacoronavirus	Coronaviridae	29890	GenBank	Severe acute respiratory syndrome coronavirus 2 isolate SARS-CoV-2/nCoV-19-02S/human/2020/VNM, complete genome		2020-01-22
MT198653	SARS-CoV-2	MT198653__SARS-2__Spain__Hum__Valencia001	Spain	Homo sapiens	Human	Betacoronavirus	Coronaviridae	29611	GenBank	Severe acute respiratory syndrome coronavirus 2 isolate SARS-CoV-2/Valencia001/human/2020/ESP, partial genome	oronasopharynx	2020-03-08
NC_045512	SARS-CoV-2	NC_045512__SARS-2__China__Hum__Wuhan-Hu-1	China	Homo sapiens	Human	Betacoronavirus	Coronaviridae	29903	RefSeq	Severe acute respiratory syndrome coronavirus 2 isolate Wuhan-Hu-1, complete genome		2019-12
		MN996532__SARS-1__China__Bat__RaTG13
		MN938384__SARS-2__China__Hum__SZ-002a_2020
		MT106054__SARS-2__USA__Hum__TX1
		MT066175__SARS-2__Taiwan__Hum__NTU01
		MT135043__SARS-2__China__Hum__233
		MT135041__SARS-2__China__Hum__105
		MT135044__SARS-2__China__Hum__235
		MT135042__SARS-2__China__Hum__231
		MT123292__SARS-2__China__Hum__IQTC04
		LR757995__SARS-2__China__Hum__seafood-market
		MT050493__SARS-2__India__Hum__166
		MT188339__SARS-2__USA__Hum__MN3-MDH3
		MT188341__SARS-2__USA__Hum__MN1-MDH1
		MT163719__SARS-2__USA__Hum__WA7-UW4
		MT163717__SARS-2__USA__Hum__WA4-UW2
		MT163718__SARS-2__USA__Hum__WA6-UW3
		MT163721__SARS-2__USA__Hum__WA9-UW6
		MT163720__SARS-2__USA__Hum__WA8-UW5
		MT152824__SARS-2__USA__Hum__WA2
		MT020880__SARS-2__USA__Hum__WA1-A12
		MN985325__SARS-2__USA__Hum__WA1
		MT020881__SARS-2__USA__Hum__WA1-F6
		MT049951__SARS-2__China__Hum__Yunnan-01
		MT226610__SARS-1__China__Hum__KMS1
		MT106053__SARS-2__USA__Hum__CA8
		MN996527__SARS-2__China__Hum__WIV02
		MT192765__SARS-2__USA__Hum__PC00101P
		MT198653__SARS-2__Spain__Hum__Valencia001
		MT184908__SARS-2__USA__Hum__CruiseA-21
		MT192759__SARS-2__Taiwan__Hum__CGMH-CGU-01
		MT159710__SARS-2__USA__Hum__CruiseA-9
		MT044258__SARS-2__USA__Hum__CA6
		MT159714__SARS-2__USA__Hum__CruiseA-16
		MT159707__SARS-2__USA__Hum__CruiseA-10
		MT159716__SARS-2__USA__Hum__CruiseA-18
		MN988669__SARS-2__China__Hum__WHU02
		MT184909__SARS-2__USA__Hum__CruiseA-22
		MT184907__SARS-2__USA__Hum__CruiseA-19
		MN988668__SARS-2__China__Hum__WHU01
		MT093631__SARS-2__China__Hum__WH-09
		MT159709__SARS-2__USA__Hum__CruiseA-12
		MT019532__SARS-2__China__Hum__WH-04-2019
		MT019533__SARS-2__China__Hum__WH-05
		MT159718__SARS-2__USA__Hum__CruiseA-2
		MT012098__SARS-2__India__Hum__29
		MT039887__SARS-2__USA__Hum__WI1
		MT123293__SARS-2__China__Hum__IQTC03
		MT123291__SARS-2__China__Hum__IQTC02
		MT159712__SARS-2__USA__Hum__CruiseA-14
		MT093571__SARS-2__Sweden__Hum__01
		MN994468__SARS-2__USA__Hum__CA2
		MT039890__SARS-2__SouthKorea__Hum__SNU01
		MT007544__SARS-2__Australia__Hum__VIC01
		MT066156__SARS-2__Italy__Hum__INMI1
		MT163716__SARS-2__USA__Hum__WA3-UW1
		MT126808__SARS-2__Brazil__Hum__SP02
		MT184910__SARS-2__USA__Hum__CruiseA-23
		MT184913__SARS-2__USA__Hum__CruiseA-26
		LC528233__SARS-2__NA__Hum__Hu-DP-Kng-19-027-RNA
		LC528232__SARS-2__NA__Hum__Hu-DP-Kng-19-020-RNA
		MT184912__SARS-2__USA__Hum__CruiseA-25
		MT019530__SARS-2__China__Hum__WH-02-2019
		LR757998__SARS-2__China__Hum__seafood-market
		MT118835__SARS-2__USA__Hum__CA9
		MT039873__SARS-2__China__Hum__HZ-1
		MT159708__SARS-2__USA__Hum__CruiseA-11
		MT019529__SARS-2__China__Hum__WH-01-2019
		MT159719__SARS-2__USA__Hum__CruiseA-3
		MN996528__SARS-2__China__Hum__WIV04
		MT159721__SARS-2__USA__Hum__CruiseA-5
		MT121215__SARS-2__China__Hum__SH01
		MT159720__SARS-2__USA__Hum__CruiseA-4
		MT159705__SARS-2__USA__Hum__CruiseA-7
		MT159722__SARS-2__USA__Hum__CruiseA-6
		MT019531__SARS-2__China__Hum__WH-03-2019
		MT188340__SARS-2__USA__Hum__MN2-MDH2
		MN996529__SARS-2__China__Hum__WIV05
		MT159713__SARS-2__USA__Hum__CruiseA-15
		MT159711__SARS-2__USA__Hum__CruiseA-13
		LR757996__SARS-2__China__Hum__seafood-market
		NC_045512__SARS-2__China__Hum__Wuhan-Hu-1
		MN996530__SARS-2__China__Hum__WIV06
		LC529905__SARS-2__Japan__Hum__TKYE6182
		MT123290__SARS-2__China__Hum__IQTC01
		MT159706__SARS-2__USA__Hum__CruiseA-8
		MT027064__SARS-2__USA__Hum__CA5
		MT020781__SARS-2__Finland__Hum__Jan29
		MT066176__SARS-2__Taiwan__Hum__NTU02
		MT192772__SARS-2__VietNam__Hum__nCoV-19-01S
		MT192773__SARS-2__VietNam__Hum__nCoV-19-02S
		MN996531__SARS-2__China__Hum__WIV07
		MT159715__SARS-2__USA__Hum__CruiseA-17
		MT184911__SARS-2__USA__Hum__CruiseA-24
		MT159717__SARS-2__USA__Hum__CruiseA-1
		MT072688__SARS-2__Nepal__Hum__61-TW
		MT039888__SARS-2__USA__Hum__MA1
		MT027062__SARS-2__USA__Hum__CA3
		MT027063__SARS-2__USA__Hum__CA4
		MN988713__SARS-2__USA__Hum__IL1
		MT044257__SARS-2__USA__Hum__IL2
		MN994467__SARS-2__USA__Hum__CA1
		MT106052__SARS-2__USA__Hum__CA7
		MN997409__SARS-2__USA__Hum__AZ1
		MN975262__SARS-2__China__Hum__SZ-005b_2020
		KY352407__SARS-1__Kenya__Bat__KY72
		GQ153543__SARS-1__China__Bat__HKU3-8
		GQ153542__SARS-1__China__Bat__HKU3-7
		GQ153547__SARS-1__China__Bat__HKU3-12
		DQ022305__SARS-1__China__Bat__HKU3-1
		DQ084200__SARS-1__China__Bat__HKU3-3
		DQ084199__SARS-1__China__Bat__HKU3-2
		GQ153541__SARS-1__China__Bat__HKU3-6
		GQ153539__SARS-1__China__Bat__HKU3-4
		GQ153540__SARS-1__China__Bat__HKU3-5
		GQ153548__SARS-1__China__Bat__HKU3-13
		GQ153546__SARS-1__China__Bat__HKU3-11
		GQ153544__SARS-1__China__Bat__HKU3-9
		GQ153545__SARS-1__China__Bat__HKU3-10
		JX993988__SARS-1__China__Bat__Cp-Yunnan2011
		KF569996__SARS-1__China__Bat__LYRa11
		DQ071615__SARS-1__China__Bat__Rp3
		KJ473815__SARS-1__China__Bat__GX2013
		KJ473816__SARS-1__China__Bat__YN2013
		KU973692__SARS-1__China__Bat__F46
		KY417145__SARS-1__China__Bat__Rf4092
		KY417149__SARS-1__China__Bat__Rs4255
		KY417143__SARS-1__China__Bat__Rs4081
		FJ588686__SARS-1__China__Bat__Rs672-2006
		KY417142__SARS-1__China__Bat__As6526
		KY417147__SARS-1__China__Bat__Rs4237
		KY417148__SARS-1__China__Bat__Rs4247
		AY304488__SARS-1__HongKong__NA__SZ16
		AY304486__SARS-1__HongKong__NA__SZ3
		AY545915__SARS-1__China__NA__HC-SZ-DM1-03
		AY613948__SARS-1__China__Mon__PC4-13
		AY613949__SARS-1__China__Mon__PC4-136
		AY613950__SARS-1__China__Mon__PC4-227
		AY545917__SARS-1__China__NA__HC-GZ-81-03
		FJ959407__SARS-1__China__Mon__A001
		AY613947__SARS-1__China__NA__GZ0402
		AY568539__SARS-1__China__Hum__GZ0401
		AY545918__SARS-1__China__NA__HC-GZ-32-03
		AY572038__SARS-1__China__Mon__civet020
		AY545916__SARS-1__China__NA__HC-SZ-266-03
		AY572035__SARS-1__China__Mon__civet010
		AY572034__SARS-1__China__Mon__civet007
		AY545914__SARS-1__China__NA__HC-SZ-79-03
		AY686863__SARS-1__NA__Mon__A022
		AY686864__SARS-1__NA__Mon__B039
		AY515512__SARS-1__China__Mon__HC-SZ-61-03
		AY545919__SARS-1__China__NA__CFB-SZ-94-03
		AY394986__SARS-1__China__NA__HSZ-Cb
		AY394994__SARS-1__China__NA__HSZ-Bc
		AY394995__SARS-1__China__NA__HSZ-Cc
		AY394985__SARS-1__China__NA__HSZ-Bb
		AY278554__SARS-1__HongKong__NA__W1
		AY279354__SARS-1__NA__NA__BJ04

## Sheet: SARS-CoV-2 167-Strains-info
Accession	Accession__Geo_Location__GenBank_Title	Species	Geo_Location	Host	strain__GenBank_Title	Release_Date	Species	Genus	Family	Length	Isolation_Source	Collection_Date	GenBank_Title
MT007544	MT007544__Australia__VIC01	SARS-CoV-2	Australia	HUM	strain__VIC01	2020-01-31T00:00:00Z	Severe acute respiratory syndrome-related coronavirus	Betacoronavirus	Coronaviridae	29893		2020-01-25	Severe acute respiratory syndrome coronavirus 2 isolate Australia/VIC01/2020, complete genome
MT126808	MT126808__Brazil__SP02	SARS-CoV-2	Brazil	HUM	strain__SP02	2020-03-02T00:00:00Z	Severe acute respiratory syndrome-related coronavirus	Betacoronavirus	Coronaviridae	29876	oronasopharynx	2020-02-28	Severe acute respiratory syndrome coronavirus 2 isolate SARS-CoV-2/SP02/human/2020/BRA, complete genome
LR757995	LR757995__China__Wuhan_seafood_market	SARS-CoV-2	China	HUM	strain__Wuhan_seafood_market	2020-02-01T00:00:00Z	Severe acute respiratory syndrome-related coronavirus	Betacoronavirus	Coronaviridae	29872		2019-12-26	Wuhan seafood market pneumonia virus genome assembly, chromosome: whole_genome
LR757996	LR757996__China__Wuhan_seafood_market	SARS-CoV-2	China	HUM	strain__Wuhan_seafood_market	2020-02-01T00:00:00Z	Severe acute respiratory syndrome-related coronavirus	Betacoronavirus	Coronaviridae	29868		2020-01-01	Wuhan seafood market pneumonia virus genome assembly, chromosome: whole_genome
LR757998	LR757998__China__Wuhan_seafood_market	SARS-CoV-2	China	HUM	strain__Wuhan_seafood_market	2020-02-01T00:00:00Z	Severe acute respiratory syndrome-related coronavirus	Betacoronavirus	Coronaviridae	29866		2019-12-26	Wuhan seafood market pneumonia virus genome assembly, chromosome: whole_genome
MN938384	MN938384__China__HKU-SZ-002a	SARS-CoV-2	China	HUM	strain__HKU-SZ-002a	2020-01-24T00:00:00Z	Severe acute respiratory syndrome-related coronavirus	Betacoronavirus	Coronaviridae	29838	oronasopharynx	2020-01-10	Severe acute respiratory syndrome coronavirus 2 isolate 2019-nCoV_HKU-SZ-002a_2020, complete genome
MN975262	MN975262__China__HKU-SZ-005b	SARS-CoV-2	China	HUM	strain__HKU-SZ-005b	2020-01-24T00:00:00Z	Severe acute respiratory syndrome-related coronavirus	Betacoronavirus	Coronaviridae	29891	lung, oronasopharynx	2020-01-11	Severe acute respiratory syndrome coronavirus 2 isolate 2019-nCoV_HKU-SZ-005b_2020, complete genome
MN988668	MN988668__China__WHU01	SARS-CoV-2	China	HUM	strain__WHU01	2020-01-28T00:00:00Z	Severe acute respiratory syndrome-related coronavirus	Betacoronavirus	Coronaviridae	29881		2020-01-02	Severe acute respiratory syndrome coronavirus 2 isolate 2019-nCoV WHU01, complete genome
MN988669	MN988669__China__WHU02	SARS-CoV-2	China	HUM	strain__WHU02	2020-01-28T00:00:00Z	Severe acute respiratory syndrome-related coronavirus	Betacoronavirus	Coronaviridae	29881		2020-01-02	Severe acute respiratory syndrome coronavirus 2 isolate 2019-nCoV WHU02, complete genome
MN996527	MN996527__China__WIV02	SARS-CoV-2	China	HUM	strain__WIV02	2020-01-29T00:00:00Z	Severe acute respiratory syndrome-related coronavirus	Betacoronavirus	Coronaviridae	29825	lung	2019-12-30	Severe acute respiratory syndrome coronavirus 2 isolate WIV02, complete genome
MN996528	MN996528__China__WIV04	SARS-CoV-2	China	HUM	strain__WIV04	2020-01-29T00:00:00Z	Severe acute respiratory syndrome-related coronavirus	Betacoronavirus	Coronaviridae	29891	lung	2019-12-30	Severe acute respiratory syndrome coronavirus 2 isolate WIV04, complete genome
MN996529	MN996529__China__WIV05	SARS-CoV-2	China	HUM	strain__WIV05	2020-01-29T00:00:00Z	Severe acute respiratory syndrome-related coronavirus	Betacoronavirus	Coronaviridae	29852	lung	2019-12-30	Severe acute respiratory syndrome coronavirus 2 isolate WIV05, complete genome
MN996530	MN996530__China__WIV06	SARS-CoV-2	China	HUM	strain__WIV06	2020-01-29T00:00:00Z	Severe acute respiratory syndrome-related coronavirus	Betacoronavirus	Coronaviridae	29854	lung	2019-12-30	Severe acute respiratory syndrome coronavirus 2 isolate WIV06, complete genome
MN996531	MN996531__China__WIV07	SARS-CoV-2	China	HUM	strain__WIV07	2020-01-29T00:00:00Z	Severe acute respiratory syndrome-related coronavirus	Betacoronavirus	Coronaviridae	29857	lung	2019-12-30	Severe acute respiratory syndrome coronavirus 2 isolate WIV07, complete genome
MT019529	MT019529__China__IPBCAMS-WH-01	SARS-CoV-2	China	HUM	strain__IPBCAMS-WH-01	2020-02-05T00:00:00Z	Severe acute respiratory syndrome-related coronavirus	Betacoronavirus	Coronaviridae	29899	lung	2019-12-23	Severe acute respiratory syndrome coronavirus 2 isolate BetaCoV/Wuhan/IPBCAMS-WH-01/2019, complete genome
MT019530	MT019530__China__IPBCAMS-WH-02	SARS-CoV-2	China	HUM	strain__IPBCAMS-WH-02	2020-02-05T00:00:00Z	Severe acute respiratory syndrome-related coronavirus	Betacoronavirus	Coronaviridae	29889	lung	2019-12-30	Severe acute respiratory syndrome coronavirus 2 isolate BetaCoV/Wuhan/IPBCAMS-WH-02/2019, complete genome
MT019531	MT019531__China__IPBCAMS-WH-03	SARS-CoV-2	China	HUM	strain__IPBCAMS-WH-03	2020-02-05T00:00:00Z	Severe acute respiratory syndrome-related coronavirus	Betacoronavirus	Coronaviridae	29899	lung	2019-12-30	Severe acute respiratory syndrome coronavirus 2 isolate BetaCoV/Wuhan/IPBCAMS-WH-03/2019, complete genome
MT019532	MT019532__China__IPBCAMS-WH-04	SARS-CoV-2	China	HUM	strain__IPBCAMS-WH-04	2020-02-05T00:00:00Z	Severe acute respiratory syndrome-related coronavirus	Betacoronavirus	Coronaviridae	29890	lung	2019-12-30	Severe acute respiratory syndrome coronavirus 2 isolate BetaCoV/Wuhan/IPBCAMS-WH-04/2019, complete genome
MT019533	MT019533__China__IPBCAMS-WH-05	SARS-CoV-2	China	HUM	strain__IPBCAMS-WH-05	2020-02-05T00:00:00Z	Severe acute respiratory syndrome-related coronavirus	Betacoronavirus	Coronaviridae	29883	lung	2020-01-01	Severe acute respiratory syndrome coronavirus 2 isolate BetaCoV/Wuhan/IPBCAMS-WH-05/2020, complete genome
MT039873	MT039873__China__HZ-1	SARS-CoV-2	China	HUM	strain__HZ-1	2020-02-11T00:00:00Z	Severe acute respiratory syndrome-related coronavirus	Betacoronavirus	Coronaviridae	29833	lung, oronasopharynx	2020-01-20	Severe acute respiratory syndrome coronavirus 2 isolate HZ-1, complete genome
MT049951	MT049951__China__Yunnan-01	SARS-CoV-2	China	HUM	strain__Yunnan-01	2020-02-12T00:00:00Z	Severe acute respiratory syndrome-related coronavirus	Betacoronavirus	Coronaviridae	29903	lung, oronasopharynx	2020-01-17	Severe acute respiratory syndrome coronavirus 2 isolate SARS-CoV-2/Yunnan-01/human/2020/CHN, complete genome
MT093631	MT093631__China__WH-09	SARS-CoV-2	China	HUM	strain__WH-09	2020-02-21T00:00:00Z	Severe acute respiratory syndrome-related coronavirus	Betacoronavirus	Coronaviridae	29860	oronasopharynx	2020-01-08	Severe acute respiratory syndrome coronavirus 2 isolate SARS-CoV-2/WH-09/human/2020/CHN, complete genome
MT121215	MT121215__China__SH01	SARS-CoV-2	China	HUM	strain__SH01	2020-03-09T00:00:00Z	Severe acute respiratory syndrome-related coronavirus	Betacoronavirus	Coronaviridae	29945	oronasopharynx	2020-02-02	Severe acute respiratory syndrome coronavirus 2 isolate SARS-CoV-2/SH01/human/2020/CHN, complete genome
MT123290	MT123290__China__IQTC01	SARS-CoV-2	China	HUM	strain__IQTC01	2020-02-28T00:00:00Z	Severe acute respiratory syndrome-related coronavirus	Betacoronavirus	Coronaviridae	29891	oronasopharynx	2020-02-05	Severe acute respiratory syndrome coronavirus 2 isolate SARS-CoV-2/IQTC01/human/2020/CHN, complete genome
MT123291	MT123291__China__IQTC02	SARS-CoV-2	China	HUM	strain__IQTC02	2020-02-28T00:00:00Z	Severe acute respiratory syndrome-related coronavirus	Betacoronavirus	Coronaviridae	29882	lung	2020-01-29	Severe acute respiratory syndrome coronavirus 2 isolate SARS-CoV-2/IQTC02/human/2020/CHN, complete genome
MT123292	MT123292__China__IQTC04	SARS-CoV-2	China	HUM	strain__IQTC04	2020-02-28T00:00:00Z	Severe acute respiratory syndrome-related coronavirus	Betacoronavirus	Coronaviridae	29923	lung, oronasopharynx	2020-01-27	Severe acute respiratory syndrome coronavirus 2 isolate SARS-CoV-2/IQTC04/human/2020/CHN, complete genome
MT123293	MT123293__China__IQTC03	SARS-CoV-2	China	HUM	strain__IQTC03	2020-02-28T00:00:00Z	Severe acute respiratory syndrome-related coronavirus	Betacoronavirus	Coronaviridae	29871	feces	2020-01-29	Severe acute respiratory syndrome coronavirus 2 isolate SARS-CoV-2/IQTC03/human/2020/CHN, complete genome
MT135041	MT135041__China__105	SARS-CoV-2	China	HUM	strain__105	2020-03-04T00:00:00Z	Severe acute respiratory syndrome-related coronavirus	Betacoronavirus	Coronaviridae	29903		2020-01-26	Severe acute respiratory syndrome coronavirus 2 isolate SARS-CoV-2/105/human/2020/CHN, complete genome
MT135042	MT135042__China__231	SARS-CoV-2	China	HUM	strain__231	2020-03-04T00:00:00Z	Severe acute respiratory syndrome-related coronavirus	Betacoronavirus	Coronaviridae	29903		2020-01-28	Severe acute respiratory syndrome coronavirus 2 isolate SARS-CoV-2/231/human/2020/CHN, complete genome
MT135043	MT135043__China__233	SARS-CoV-2	China	HUM	strain__233	2020-03-04T00:00:00Z	Severe acute respiratory syndrome-related coronavirus	Betacoronavirus	Coronaviridae	29903		2020-01-28	Severe acute respiratory syndrome coronavirus 2 isolate SARS-CoV-2/233/human/2020/CHN, complete genome
MT135044	MT135044__China__235	SARS-CoV-2	China	HUM	strain__235	2020-03-04T00:00:00Z	Severe acute respiratory syndrome-related coronavirus	Betacoronavirus	Coronaviridae	29903		2020-01-28	Severe acute respiratory syndrome coronavirus 2 isolate SARS-CoV-2/235/human/2020/CHN, complete genome
MT226610	MT226610__China__KMS1	SARS-CoV-2	China	HUM	strain__KMS1	2020-03-20T00:00:00Z	Severe acute respiratory syndrome-related coronavirus	Betacoronavirus	Coronaviridae	29899	oronasopharynx	2020-01-20	Severe acute respiratory syndrome coronavirus 2 isolate SARS-CoV-2/KMS1/human/2020/CHN, complete genome
MT253696	MT253696__China__HZ-162	SARS-CoV-2	China	HUM	strain__HZ-162	2020-03-27T00:00:00Z	Severe acute respiratory syndrome-related coronavirus	Betacoronavirus	Coronaviridae	29781	lung, oronasopharynx	2020-01-23	Severe acute respiratory syndrome coronavirus 2 isolate SARS-CoV-2/HZ-162/human/2020/CHN, complete genome
MT253697	MT253697__China__HZ-178	SARS-CoV-2	China	HUM	strain__HZ-178	2020-03-27T00:00:00Z	Severe acute respiratory syndrome-related coronavirus	Betacoronavirus	Coronaviridae	29781	lung, oronasopharynx	2020-01-23	Severe acute respiratory syndrome coronavirus 2 isolate SARS-CoV-2/HZ-178/human/2020/CHN, complete genome
MT253698	MT253698__China__HZ-185	SARS-CoV-2	China	HUM	strain__HZ-185	2020-03-27T00:00:00Z	Severe acute respiratory syndrome-related coronavirus	Betacoronavirus	Coronaviridae	29781	lung, oronasopharynx	2020-01-23	Severe acute respiratory syndrome coronavirus 2 isolate SARS-CoV-2/HZ-185/human/2020/CHN, complete genome
MT253699	MT253699__China__HZ-477	SARS-CoV-2	China	HUM	strain__HZ-477	2020-03-27T00:00:00Z	Severe acute respiratory syndrome-related coronavirus	Betacoronavirus	Coronaviridae	29781	lung, oronasopharynx	2020-01-24	Severe acute respiratory syndrome coronavirus 2 isolate SARS-CoV-2/HZ-477/human/2020/CHN, complete genome
MT253700	MT253700__China__HZ-481	SARS-CoV-2	China	HUM	strain__HZ-481	2020-03-27T00:00:00Z	Severe acute respiratory syndrome-related coronavirus	Betacoronavirus	Coronaviridae	29781	lung, oronasopharynx	2020-01-25	Severe acute respiratory syndrome coronavirus 2 isolate SARS-CoV-2/HZ-481/human/2020/CHN, complete genome
MT253701	MT253701__China__HZ-48	SARS-CoV-2	China	HUM	strain__HZ-48	2020-03-27T00:00:00Z	Severe acute respiratory syndrome-related coronavirus	Betacoronavirus	Coronaviridae	29781	lung, oronasopharynx	2020-01-21	Severe acute respiratory syndrome coronavirus 2 isolate SARS-CoV-2/HZ-48/human/2020/CHN, complete genome
MT253702	MT253702__China__HZ-49	SARS-CoV-2	China	HUM	strain__HZ-49	2020-03-27T00:00:00Z	Severe acute respiratory syndrome-related coronavirus	Betacoronavirus	Coronaviridae	29781	lung, oronasopharynx	2020-01-21	Severe acute respiratory syndrome coronavirus 2 isolate SARS-CoV-2/HZ-49/human/2020/CHN, complete genome
MT253703	MT253703__China__HZ-551	SARS-CoV-2	China	HUM	strain__HZ-551	2020-03-27T00:00:00Z	Severe acute respiratory syndrome-related coronavirus	Betacoronavirus	Coronaviridae	29781	lung, oronasopharynx	2020-01-25	Severe acute respiratory syndrome coronavirus 2 isolate SARS-CoV-2/HZ-551/human/2020/CHN, complete genome
MT253704	MT253704__China__HZ-576	SARS-CoV-2	China	HUM	strain__HZ-576	2020-03-27T00:00:00Z	Severe acute respiratory syndrome-related coronavirus	Betacoronavirus	Coronaviridae	29781	lung, oronasopharynx	2020-01-25	Severe acute respiratory syndrome coronavirus 2 isolate SARS-CoV-2/HZ-576/human/2020/CHN, complete genome
MT253705	MT253705__China__HZ-60	SARS-CoV-2	China	HUM	strain__HZ-60	2020-03-27T00:00:00Z	Severe acute respiratory syndrome-related coronavirus	Betacoronavirus	Coronaviridae	29781	lung, oronasopharynx	2020-01-22	Severe acute respiratory syndrome coronavirus 2 isolate SARS-CoV-2/HZ-60/human/2020/CHN, complete genome
MT253706	MT253706__China__HZ-62	SARS-CoV-2	China	HUM	strain__HZ-62	2020-03-27T00:00:00Z	Severe acute respiratory syndrome-related coronavirus	Betacoronavirus	Coronaviridae	29781	lung, oronasopharynx	2020-01-22	Severe acute respiratory syndrome coronavirus 2 isolate SARS-CoV-2/HZ-62/human/2020/CHN, complete genome
MT253707	MT253707__China__HZ-638	SARS-CoV-2	China	HUM	strain__HZ-638	2020-03-27T00:00:00Z	Severe acute respiratory syndrome-related coronavirus	Betacoronavirus	Coronaviridae	29781	lung, oronasopharynx	2020-01-25	Severe acute respiratory syndrome coronavirus 2 isolate SARS-CoV-2/HZ-638/human/2020/CHN, complete genome
MT253708	MT253708__China__HZ-79	SARS-CoV-2	China	HUM	strain__HZ-79	2020-03-27T00:00:00Z	Severe acute respiratory syndrome-related coronavirus	Betacoronavirus	Coronaviridae	29781	lung, oronasopharynx	2020-01-21	Severe acute respiratory syndrome coronavirus 2 isolate SARS-CoV-2/HZ-79/human/2020/CHN, complete genome
MT253709	MT253709__China__HZ-90	SARS-CoV-2	China	HUM	strain__HZ-90	2020-03-27T00:00:00Z	Severe acute respiratory syndrome-related coronavirus	Betacoronavirus	Coronaviridae	29781	lung, oronasopharynx	2020-01-21	Severe acute respiratory syndrome coronavirus 2 isolate SARS-CoV-2/HZ-90/human/2020/CHN, complete genome
MT253710	MT253710__China__HZ-91	SARS-CoV-2	China	HUM	strain__HZ-91	2020-03-27T00:00:00Z	Severe acute respiratory syndrome-related coronavirus	Betacoronavirus	Coronaviridae	29781	lung, oronasopharynx	2020-01-21	Severe acute respiratory syndrome coronavirus 2 isolate SARS-CoV-2/HZ-91/human/2020/CHN, complete genome
NC_045512	NC_045512__China__Wuhan-Hu-1	SARS-CoV-2	China	HUM	strain__Wuhan-Hu-1	2020-01-13T00:00:00Z	Severe acute respiratory syndrome-related coronavirus	Betacoronavirus	Coronaviridae	29903		2019-12	Severe acute respiratory syndrome coronavirus 2 isolate Wuhan-Hu-1, complete genome
MT020781	MT020781__Finland__29_Jan	SARS-CoV-2	Finland	HUM	strain__29_Jan	2020-02-05T00:00:00Z	Severe acute respiratory syndrome-related coronavirus	Betacoronavirus	Coronaviridae	29806		2020-01-29	Severe acute respiratory syndrome coronavirus 2 isolate nCoV-FIN-29-Jan-2020, partial genome
MT012098	MT012098__India__29	SARS-CoV-2	India	HUM	strain__29	2020-03-06T00:00:00Z	Severe acute respiratory syndrome-related coronavirus	Betacoronavirus	Coronaviridae	29854	oronasopharynx	2020-01-27	Severe acute respiratory syndrome coronavirus 2 isolate SARS-CoV-2/29/human/2020/IND, complete genome
MT050493	MT050493__India__166	SARS-CoV-2	India	HUM	strain__166	2020-03-06T00:00:00Z	Severe acute respiratory syndrome-related coronavirus	Betacoronavirus	Coronaviridae	29851	oronasopharynx	2020-01-31	Severe acute respiratory syndrome coronavirus 2 isolate SARS-CoV-2/166/human/2020/IND, complete genome
MT066156	MT066156__Italy__INMI1	SARS-CoV-2	Italy	HUM	strain__INMI1	2020-03-09T00:00:00Z	Severe acute respiratory syndrome-related coronavirus	Betacoronavirus	Coronaviridae	29867	lung, oronasopharynx	2020-01-30	Severe acute respiratory syndrome coronavirus 2 isolate SARS-CoV-2/INMI1/human/2020/ITA, complete genome
LC528232	LC528232__Japan__19-020	SARS-CoV-2	Japan	HUM	strain__19-020	2020-02-29T00:00:00Z	Severe acute respiratory syndrome-related coronavirus	Betacoronavirus	Coronaviridae	29902	oronasopharynx	2020-02-10	Severe acute respiratory syndrome coronavirus 2 SARS-CoV-2/Hu/DP/Kng/19-020 RNA, complete genome
LC528233	LC528233__Japan__19-027	SARS-CoV-2	Japan	HUM	strain__19-027	2020-02-29T00:00:00Z	Severe acute respiratory syndrome-related coronavirus	Betacoronavirus	Coronaviridae	29902	oronasopharynx	2020-02-10	Severe acute respiratory syndrome coronavirus 2 SARS-CoV-2/Hu/DP/Kng/19-027 RNA, complete genome
LC529905	LC529905__Japan__TKYE6182	SARS-CoV-2	Japan	HUM	strain__TKYE6182	2020-03-07T00:00:00Z	Severe acute respiratory syndrome-related coronavirus	Betacoronavirus	Coronaviridae	29903		2020-01	Severe acute respiratory syndrome coronavirus 2 TKYE6182_2020 RNA, complete genome
LC534418	LC534418__Japan__19-031	SARS-CoV-2	Japan	HUM	strain__19-031	2020-03-28T00:00:00Z	Severe acute respiratory syndrome-related coronavirus	Betacoronavirus	Coronaviridae	29878	lung, oronasopharynx	2020-02-14	Severe acute respiratory syndrome coronavirus 2 SARS-CoV-2/Hu/DP/Kng/19-031 RNA, complete genome
LC534419	LC534419__Japan__19-437	SARS-CoV-2	Japan	HUM	strain__19-437	2020-03-28T00:00:00Z	Severe acute respiratory syndrome-related coronavirus	Betacoronavirus	Coronaviridae	29874	oronasopharynx	2020-03-09	Severe acute respiratory syndrome coronavirus 2 SARS-CoV-2/Hu/Kng/19-437 RNA, complete genome
MT072688	MT072688__Nepal__61-TW	SARS-CoV-2	Nepal	HUM	strain__61-TW	2020-02-18T00:00:00Z	Severe acute respiratory syndrome-related coronavirus	Betacoronavirus	Coronaviridae	29811	oronasopharynx	2020-01-13	Severe acute respiratory syndrome coronavirus 2 isolate SARS0CoV-2/61-TW/human/2020/ NPL, complete genome
MT240479	MT240479__Pakistan__Gilgit1	SARS-CoV-2	Pakistan	HUM	strain__Gilgit1	2020-03-25T00:00:00Z	Severe acute respiratory syndrome-related coronavirus	Betacoronavirus	Coronaviridae	29836	oronasopharynx	2020-03-04	Severe acute respiratory syndrome coronavirus 2 isolate SARS-CoV-2/Gilgit1/human/2020/PAK, complete genome
MT039890	MT039890__SouthKorea__SNU01	SARS-CoV-2	SouthKorea	HUM	strain__SNU01	2020-02-11T00:00:00Z	Severe acute respiratory syndrome-related coronavirus	Betacoronavirus	Coronaviridae	29903		2020-01	Severe acute respiratory syndrome coronavirus 2 isolate SNU01, complete genome
MT198652	MT198652__Spain__Valencia003	SARS-CoV-2	Spain	HUM	strain__Valencia003	2020-03-17T00:00:00Z	Severe acute respiratory syndrome-related coronavirus	Betacoronavirus	Coronaviridae	29782	lung	2020-03-05	Severe acute respiratory syndrome coronavirus 2 isolate SARS-CoV-2/Valencia003/human/2020/ESP, complete genome
MT233519	MT233519__Spain__Valencia5	SARS-CoV-2	Spain	HUM	strain__Valencia5	2020-03-24T00:00:00Z	Severe acute respiratory syndrome-related coronavirus	Betacoronavirus	Coronaviridae	29782		2020-02-27	Severe acute respiratory syndrome coronavirus 2 isolate SARS-CoV-2/Valencia5/human/2020/ESP, complete genome
MT233522	MT233522__Spain__Valencia7	SARS-CoV-2	Spain	HUM	strain__Valencia7	2020-03-24T00:00:00Z	Severe acute respiratory syndrome-related coronavirus	Betacoronavirus	Coronaviridae	29782		2020-03-02	Severe acute respiratory syndrome coronavirus 2 isolate SARS-CoV-2/Valencia7/human/2020/ESP, complete genome
MT233523	MT233523__Spain__Valencia8	SARS-CoV-2	Spain	HUM	strain__Valencia8	2020-03-24T00:00:00Z	Severe acute respiratory syndrome-related coronavirus	Betacoronavirus	Coronaviridae	29782		2020-03-04	Severe acute respiratory syndrome coronavirus 2 isolate SARS-CoV-2/Valencia8/human/2020/ESP, complete genome
MT093571	MT093571__Sweden__01	SARS-CoV-2	Sweden	HUM	strain__01	2020-02-21T00:00:00Z	Severe acute respiratory syndrome-related coronavirus	Betacoronavirus	Coronaviridae	29886		2020-02-07	Severe acute respiratory syndrome coronavirus 2 isolate SARS-CoV-2/01/human/2020/SWE, complete genome
MT066175	MT066175__Taiwan__NTU01	SARS-CoV-2	Taiwan	HUM	strain__NTU01	2020-02-14T00:00:00Z	Severe acute respiratory syndrome-related coronavirus	Betacoronavirus	Coronaviridae	29870		2020-01-31	Severe acute respiratory syndrome coronavirus 2 isolate SARS-CoV-2/NTU01/2020/TWN, complete genome
MT066176	MT066176__Taiwan__NTU02	SARS-CoV-2	Taiwan	HUM	strain__NTU02	2020-02-14T00:00:00Z	Severe acute respiratory syndrome-related coronavirus	Betacoronavirus	Coronaviridae	29870		2020-02-05	Severe acute respiratory syndrome coronavirus 2 isolate SARS-CoV-2/NTU02/2020/TWN, complete genome
MT192759	MT192759__Taiwan__CGMH-CGU-01	SARS-CoV-2	Taiwan	HUM	strain__CGMH-CGU-01	2020-03-16T00:00:00Z	Severe acute respiratory syndrome-related coronavirus	Betacoronavirus	Coronaviridae	29862	lung, oronasopharynx	2020-01-25	Severe acute respiratory syndrome coronavirus 2 isolate SARS-CoV-2/CGMH-CGU-01/human2020/TWN, complete genome
MN985325	MN985325__USA__WA1	SARS-CoV-2	USA	HUM	strain__WA1	2020-01-24T00:00:00Z	Severe acute respiratory syndrome-related coronavirus	Betacoronavirus	Coronaviridae	29882	oronasopharynx	2020-01-19	Severe acute respiratory syndrome coronavirus 2 isolate 2019-nCoV/USA-WA1/2020, complete genome
MN988713	MN988713__USA__IL1	SARS-CoV-2	USA	HUM	strain__IL1	2020-01-25T00:00:00Z	Severe acute respiratory syndrome-related coronavirus	Betacoronavirus	Coronaviridae	29882	lung, oronasopharynx	2020-01-21	Severe acute respiratory syndrome coronavirus 2 isolate 2019-nCoV/USA-IL1/2020, complete genome
MN994467	MN994467__USA__CA1	SARS-CoV-2	USA	HUM	strain__CA1	2020-01-28T00:00:00Z	Severe acute respiratory syndrome-related coronavirus	Betacoronavirus	Coronaviridae	29882	oronasopharynx	2020-01-23	Severe acute respiratory syndrome coronavirus 2 isolate 2019-nCoV/USA-CA1/2020, complete genome
MN994468	MN994468__USA__CA2	SARS-CoV-2	USA	HUM	strain__CA2	2020-01-28T00:00:00Z	Severe acute respiratory syndrome-related coronavirus	Betacoronavirus	Coronaviridae	29883	oronasopharynx	2020-01-22	Severe acute respiratory syndrome coronavirus 2 isolate 2019-nCoV/USA-CA2/2020, complete genome
MN997409	MN997409__USA__AZ1	SARS-CoV-2	USA	HUM	strain__AZ1	2020-01-28T00:00:00Z	Severe acute respiratory syndrome-related coronavirus	Betacoronavirus	Coronaviridae	29882	feces	2020-01-22	Severe acute respiratory syndrome coronavirus 2 isolate 2019-nCoV/USA-AZ1/2020, complete genome
MT020880	MT020880__USA__WA1-A12	SARS-CoV-2	USA	HUM	strain__WA1-A12	2020-02-05T00:00:00Z	Severe acute respiratory syndrome-related coronavirus	Betacoronavirus	Coronaviridae	29882	oronasopharynx	2020-01-25	Severe acute respiratory syndrome coronavirus 2 isolate 2019-nCoV/USA-WA1-A12/2020, complete genome
MT020881	MT020881__USA__WA1-F6	SARS-CoV-2	USA	HUM	strain__WA1-F6	2020-02-05T00:00:00Z	Severe acute respiratory syndrome-related coronavirus	Betacoronavirus	Coronaviridae	29882	oronasopharynx	2020-01-25	Severe acute respiratory syndrome coronavirus 2 isolate 2019-nCoV/USA-WA1-F6/2020, complete genome
MT027062	MT027062__USA__CA3	SARS-CoV-2	USA	HUM	strain__CA3	2020-02-07T00:00:00Z	Severe acute respiratory syndrome-related coronavirus	Betacoronavirus	Coronaviridae	29882	oronasopharynx	2020-01-29	Severe acute respiratory syndrome coronavirus 2 isolate 2019-nCoV/USA-CA3/2020, complete genome
MT027063	MT027063__USA__CA4	SARS-CoV-2	USA	HUM	strain__CA4	2020-02-07T00:00:00Z	Severe acute respiratory syndrome-related coronavirus	Betacoronavirus	Coronaviridae	29882	oronasopharynx	2020-01-29	Severe acute respiratory syndrome coronavirus 2 isolate 2019-nCoV/USA-CA4/2020, complete genome
MT027064	MT027064__USA__CA5	SARS-CoV-2	USA	HUM	strain__CA5	2020-02-07T00:00:00Z	Severe acute respiratory syndrome-related coronavirus	Betacoronavirus	Coronaviridae	29882	oronasopharynx	2020-01-29	Severe acute respiratory syndrome coronavirus 2 isolate 2019-nCoV/USA-CA5/2020, complete genome
MT039887	MT039887__USA__WI1	SARS-CoV-2	USA	HUM	strain__WI1	2020-02-11T00:00:00Z	Severe acute respiratory syndrome-related coronavirus	Betacoronavirus	Coronaviridae	29879	oronasopharynx	2020-01-31	Severe acute respiratory syndrome coronavirus 2 isolate 2019-nCoV/USA-WI1/2020, complete genome
MT039888	MT039888__USA__MA1	SARS-CoV-2	USA	HUM	strain__MA1	2020-02-11T00:00:00Z	Severe acute respiratory syndrome-related coronavirus	Betacoronavirus	Coronaviridae	29882	oronasopharynx	2020-01-29	Severe acute respiratory syndrome coronavirus 2 isolate 2019-nCoV/USA-MA1/2020, complete genome
MT044257	MT044257__USA__IL2	SARS-CoV-2	USA	HUM	strain__IL2	2020-02-12T00:00:00Z	Severe acute respiratory syndrome-related coronavirus	Betacoronavirus	Coronaviridae	29882	lung, oronasopharynx	2020-01-28	Severe acute respiratory syndrome coronavirus 2 isolate 2019-nCoV/USA-IL2/2020, complete genome
MT044258	MT044258__USA__CA6	SARS-CoV-2	USA	HUM	strain__CA6	2020-02-12T00:00:00Z	Severe acute respiratory syndrome-related coronavirus	Betacoronavirus	Coronaviridae	29858	oronasopharynx	2020-01-27	Severe acute respiratory syndrome coronavirus 2 isolate 2019-nCoV/USA-CA6/2020, complete genome
MT106052	MT106052__USA__CA7	SARS-CoV-2	USA	HUM	strain__CA7	2020-02-24T00:00:00Z	Severe acute respiratory syndrome-related coronavirus	Betacoronavirus	Coronaviridae	29882	oronasopharynx	2020-02-06	Severe acute respiratory syndrome coronavirus 2 isolate 2019-nCoV/USA-CA7/2020, complete genome
MT106053	MT106053__USA__CA8	SARS-CoV-2	USA	HUM	strain__CA8	2020-02-24T00:00:00Z	Severe acute respiratory syndrome-related coronavirus	Betacoronavirus	Coronaviridae	29882	oronasopharynx	2020-02-10	Severe acute respiratory syndrome coronavirus 2 isolate 2019-nCoV/USA-CA8/2020, complete genome
MT106054	MT106054__USA__TX1	SARS-CoV-2	USA	HUM	strain__TX1	2020-02-24T00:00:00Z	Severe acute respiratory syndrome-related coronavirus	Betacoronavirus	Coronaviridae	29882	lung, oronasopharynx	2020-02-11	Severe acute respiratory syndrome coronavirus 2 isolate 2019-nCoV/USA-TX1/2020, complete genome
MT118835	MT118835__USA__CA9	SARS-CoV-2	USA	HUM	strain__CA9	2020-02-27T00:00:00Z	Severe acute respiratory syndrome-related coronavirus	Betacoronavirus	Coronaviridae	29882	lung	2020-02-23	Severe acute respiratory syndrome coronavirus 2 isolate 2019-nCoV/USA-CA9/2020, complete genome
MT152824	MT152824__USA__WA2	SARS-CoV-2	USA	HUM	strain__WA2	2020-03-05T00:00:00Z	Severe acute respiratory syndrome-related coronavirus	Betacoronavirus	Coronaviridae	29878		2020-02-24	Severe acute respiratory syndrome coronavirus 2 isolate SARS-CoV-2/WA2/human/2020/USA, complete genome
MT159705	MT159705__USA__CruiseA-7	SARS-CoV-2	USA	HUM	strain__CruiseA-7	2020-03-09T00:00:00Z	Severe acute respiratory syndrome-related coronavirus	Betacoronavirus	Coronaviridae	29882	oronasopharynx	2020-02-17	Severe acute respiratory syndrome coronavirus 2 isolate 2019-nCoV/USA-CruiseA-7/2020, complete genome
MT159706	MT159706__USA__CruiseA-8	SARS-CoV-2	USA	HUM	strain__CruiseA-8	2020-03-09T00:00:00Z	Severe acute respiratory syndrome-related coronavirus	Betacoronavirus	Coronaviridae	29882	oronasopharynx	2020-02-17	Severe acute respiratory syndrome coronavirus 2 isolate 2019-nCoV/USA-CruiseA-8/2020, complete genome
MT159707	MT159707__USA__CruiseA-10	SARS-CoV-2	USA	HUM	strain__CruiseA-10	2020-03-09T00:00:00Z	Severe acute respiratory syndrome-related coronavirus	Betacoronavirus	Coronaviridae	29882	oronasopharynx	2020-02-17	Severe acute respiratory syndrome coronavirus 2 isolate 2019-nCoV/USA-CruiseA-10/2020, complete genome
MT159708	MT159708__USA__CruiseA-11	SARS-CoV-2	USA	HUM	strain__CruiseA-11	2020-03-09T00:00:00Z	Severe acute respiratory syndrome-related coronavirus	Betacoronavirus	Coronaviridae	29882	oronasopharynx	2020-02-17	Severe acute respiratory syndrome coronavirus 2 isolate 2019-nCoV/USA-CruiseA-11/2020, complete genome
MT159709	MT159709__USA__CruiseA-12	SARS-CoV-2	USA	HUM	strain__CruiseA-12	2020-03-09T00:00:00Z	Severe acute respiratory syndrome-related coronavirus	Betacoronavirus	Coronaviridae	29882	oronasopharynx	2020-02-20	Severe acute respiratory syndrome coronavirus 2 isolate 2019-nCoV/USA-CruiseA-12/2020, complete genome
MT159710	MT159710__USA__CruiseA-9	SARS-CoV-2	USA	HUM	strain__CruiseA-9	2020-03-09T00:00:00Z	Severe acute respiratory syndrome-related coronavirus	Betacoronavirus	Coronaviridae	29882	oronasopharynx	2020-02-17	Severe acute respiratory syndrome coronavirus 2 isolate 2019-nCoV/USA-CruiseA-9/2020, complete genome
MT159711	MT159711__USA__CruiseA-13	SARS-CoV-2	USA	HUM	strain__CruiseA-13	2020-03-09T00:00:00Z	Severe acute respiratory syndrome-related coronavirus	Betacoronavirus	Coronaviridae	29882	oronasopharynx	2020-02-20	Severe acute respiratory syndrome coronavirus 2 isolate 2019-nCoV/USA-CruiseA-13/2020, complete genome
MT159712	MT159712__USA__CruiseA-14	SARS-CoV-2	USA	HUM	strain__CruiseA-14	2020-03-09T00:00:00Z	Severe acute respiratory syndrome-related coronavirus	Betacoronavirus	Coronaviridae	29882	oronasopharynx	2020-02-25	Severe acute respiratory syndrome coronavirus 2 isolate 2019-nCoV/USA-CruiseA-14/2020, complete genome
MT159713	MT159713__USA__CruiseA-15	SARS-CoV-2	USA	HUM	strain__CruiseA-15	2020-03-09T00:00:00Z	Severe acute respiratory syndrome-related coronavirus	Betacoronavirus	Coronaviridae	29882	oronasopharynx	2020-02-18	Severe acute respiratory syndrome coronavirus 2 isolate 2019-nCoV/USA-CruiseA-15/2020, complete genome
MT159714	MT159714__USA__CruiseA-16	SARS-CoV-2	USA	HUM	strain__CruiseA-16	2020-03-09T00:00:00Z	Severe acute respiratory syndrome-related coronavirus	Betacoronavirus	Coronaviridae	29882	oronasopharynx	2020-02-18	Severe acute respiratory syndrome coronavirus 2 isolate 2019-nCoV/USA-CruiseA-16/2020, complete genome
MT159715	MT159715__USA__CruiseA-17	SARS-CoV-2	USA	HUM	strain__CruiseA-17	2020-03-09T00:00:00Z	Severe acute respiratory syndrome-related coronavirus	Betacoronavirus	Coronaviridae	29882	oronasopharynx	2020-02-24	Severe acute respiratory syndrome coronavirus 2 isolate 2019-nCoV/USA-CruiseA-17/2020, complete genome
MT159716	MT159716__USA__CruiseA-18	SARS-CoV-2	USA	HUM	strain__CruiseA-18	2020-03-09T00:00:00Z	Severe acute respiratory syndrome-related coronavirus	Betacoronavirus	Coronaviridae	29867	oronasopharynx	2020-02-24	Severe acute respiratory syndrome coronavirus 2 isolate 2019-nCoV/USA-CruiseA-18/2020, complete genome
MT159717	MT159717__USA__CruiseA-1	SARS-CoV-2	USA	HUM	strain__CruiseA-1	2020-03-09T00:00:00Z	Severe acute respiratory syndrome-related coronavirus	Betacoronavirus	Coronaviridae	29882	oronasopharynx	2020-02-17	Severe acute respiratory syndrome coronavirus 2 isolate 2019-nCoV/USA-CruiseA-1/2020, complete genome
MT159718	MT159718__USA__CruiseA-2	SARS-CoV-2	USA	HUM	strain__CruiseA-2	2020-03-09T00:00:00Z	Severe acute respiratory syndrome-related coronavirus	Betacoronavirus	Coronaviridae	29882	oronasopharynx	2020-02-18	Severe acute respiratory syndrome coronavirus 2 isolate 2019-nCoV/USA-CruiseA-2/2020, complete genome
MT159719	MT159719__USA__CruiseA-3	SARS-CoV-2	USA	HUM	strain__CruiseA-3	2020-03-09T00:00:00Z	Severe acute respiratory syndrome-related coronavirus	Betacoronavirus	Coronaviridae	29882	oronasopharynx	2020-02-18	Severe acute respiratory syndrome coronavirus 2 isolate 2019-nCoV/USA-CruiseA-3/2020, complete genome
MT159720	MT159720__USA__CruiseA-4	SARS-CoV-2	USA	HUM	strain__CruiseA-4	2020-03-09T00:00:00Z	Severe acute respiratory syndrome-related coronavirus	Betacoronavirus	Coronaviridae	29882	oronasopharynx	2020-02-21	Severe acute respiratory syndrome coronavirus 2 isolate 2019-nCoV/USA-CruiseA-4/2020, complete genome
MT159721	MT159721__USA__CruiseA-5	SARS-CoV-2	USA	HUM	strain__CruiseA-5	2020-03-09T00:00:00Z	Severe acute respiratory syndrome-related coronavirus	Betacoronavirus	Coronaviridae	29882	oronasopharynx	2020-02-21	Severe acute respiratory syndrome coronavirus 2 isolate 2019-nCoV/USA-CruiseA-5/2020, complete genome
MT159722	MT159722__USA__CruiseA-6	SARS-CoV-2	USA	HUM	strain__CruiseA-6	2020-03-09T00:00:00Z	Severe acute respiratory syndrome-related coronavirus	Betacoronavirus	Coronaviridae	29882	oronasopharynx	2020-02-21	Severe acute respiratory syndrome coronavirus 2 isolate 2019-nCoV/USA-CruiseA-6/2020, complete genome
MT163716	MT163716__USA__WA3-UW1	SARS-CoV-2	USA	HUM	strain__WA3-UW1	2020-03-10T00:00:00Z	Severe acute respiratory syndrome-related coronavirus	Betacoronavirus	Coronaviridae	29903		2020-02-27	Severe acute respiratory syndrome coronavirus 2 isolate SARS-CoV-2/WA3-UW1/human/2020/USA, complete genome
MT163717	MT163717__USA__WA4-UW2	SARS-CoV-2	USA	HUM	strain__WA4-UW2	2020-03-10T00:00:00Z	Severe acute respiratory syndrome-related coronavirus	Betacoronavirus	Coronaviridae	29897		2020-02-28	Severe acute respiratory syndrome coronavirus 2 isolate SARS-CoV-2/WA4-UW2/human/2020/USA, complete genome
MT163718	MT163718__USA__WA6-UW3	SARS-CoV-2	USA	HUM	strain__WA6-UW3	2020-03-10T00:00:00Z	Severe acute respiratory syndrome-related coronavirus	Betacoronavirus	Coronaviridae	29903		2020-02-29	Severe acute respiratory syndrome coronavirus 2 isolate SARS-CoV-2/WA6-UW3/human/2020/USA, complete genome
MT163719	MT163719__USA__WA7-UW4	SARS-CoV-2	USA	HUM	strain__WA7-UW4	2020-03-10T00:00:00Z	Severe acute respiratory syndrome-related coronavirus	Betacoronavirus	Coronaviridae	29903		2020-03-01	Severe acute respiratory syndrome coronavirus 2 isolate SARS-CoV-2/WA7-UW4/human/2020/USA, complete genome
MT184907	MT184907__USA__CruiseA-19	SARS-CoV-2	USA	HUM	strain__CruiseA-19	2020-03-12T00:00:00Z	Severe acute respiratory syndrome-related coronavirus	Betacoronavirus	Coronaviridae	29882	oronasopharynx	2020-02-18	Severe acute respiratory syndrome coronavirus 2 isolate 2019-nCoV/USA-CruiseA-19/2020, complete genome
MT184908	MT184908__USA__CruiseA-21	SARS-CoV-2	USA	HUM	strain__CruiseA-21	2020-03-12T00:00:00Z	Severe acute respiratory syndrome-related coronavirus	Betacoronavirus	Coronaviridae	29880	oronasopharynx	2020-02-21	Severe acute respiratory syndrome coronavirus 2 isolate 2019-nCoV/USA-CruiseA-21/2020, complete genome
MT184909	MT184909__USA__CruiseA-22	SARS-CoV-2	USA	HUM	strain__CruiseA-22	2020-03-12T00:00:00Z	Severe acute respiratory syndrome-related coronavirus	Betacoronavirus	Coronaviridae	29882	oronasopharynx	2020-02-21	Severe acute respiratory syndrome coronavirus 2 isolate 2019-nCoV/USA-CruiseA-22/2020, complete genome
MT184910	MT184910__USA__CruiseA-23	SARS-CoV-2	USA	HUM	strain__CruiseA-23	2020-03-12T00:00:00Z	Severe acute respiratory syndrome-related coronavirus	Betacoronavirus	Coronaviridae	29882	oronasopharynx	2020-02-18	Severe acute respiratory syndrome coronavirus 2 isolate 2019-nCoV/USA-CruiseA-23/2020, complete genome
MT184911	MT184911__USA__CruiseA-24	SARS-CoV-2	USA	HUM	strain__CruiseA-24	2020-03-12T00:00:00Z	Severe acute respiratory syndrome-related coronavirus	Betacoronavirus	Coronaviridae	29882	oronasopharynx	2020-02-17	Severe acute respiratory syndrome coronavirus 2 isolate 2019-nCoV/USA-CruiseA-24/2020, complete genome
MT184912	MT184912__USA__CruiseA-25	SARS-CoV-2	USA	HUM	strain__CruiseA-25	2020-03-12T00:00:00Z	Severe acute respiratory syndrome-related coronavirus	Betacoronavirus	Coronaviridae	29882	oronasopharynx	2020-02-17	Severe acute respiratory syndrome coronavirus 2 isolate 2019-nCoV/USA-CruiseA-25/2020, complete genome
MT184913	MT184913__USA__CruiseA-26	SARS-CoV-2	USA	HUM	strain__CruiseA-26	2020-03-12T00:00:00Z	Severe acute respiratory syndrome-related coronavirus	Betacoronavirus	Coronaviridae	29882	oronasopharynx	2020-02-24	Severe acute respiratory syndrome coronavirus 2 isolate 2019-nCoV/USA-CruiseA-26/2020, complete genome
MT188339	MT188339__USA__MN3-MDH3	SARS-CoV-2	USA	HUM	strain__MN3-MDH3	2020-03-13T00:00:00Z	Severe acute respiratory syndrome-related coronavirus	Betacoronavirus	Coronaviridae	29783		2020-03-09	Severe acute respiratory syndrome coronavirus 2 isolate USA/MN3-MDH3/2020, complete genome
MT188340	MT188340__USA__MN2-MDH2	SARS-CoV-2	USA	HUM	strain__MN2-MDH2	2020-03-13T00:00:00Z	Severe acute respiratory syndrome-related coronavirus	Betacoronavirus	Coronaviridae	29845		2020-03-07	Severe acute respiratory syndrome coronavirus 2 isolate USA/MN2-MDH2/2020, complete genome
MT188341	MT188341__USA__MN1-MDH1	SARS-CoV-2	USA	HUM	strain__MN1-MDH1	2020-03-13T00:00:00Z	Severe acute respiratory syndrome-related coronavirus	Betacoronavirus	Coronaviridae	29835		2020-03-05	Severe acute respiratory syndrome coronavirus 2 isolate USA/MN1-MDH1/2020, complete genome
MT192765	MT192765__USA__PC00101P	SARS-CoV-2	USA	HUM	strain__PC00101P	2020-03-16T00:00:00Z	Severe acute respiratory syndrome-related coronavirus	Betacoronavirus	Coronaviridae	29829		2020-03-11	Severe acute respiratory syndrome coronavirus 2 isolate SARS-CoV-2/PC00101P/human/2020/USA, complete genome
MT233526	MT233526__USA__DAARGOS_983	SARS-CoV-2	USA	HUM	strain__DAARGOS_983	2020-03-26T00:00:00Z	Severe acute respiratory syndrome-related coronavirus	Betacoronavirus	Coronaviridae	29847	oronasopharynx	2020-01-19	Severe acute respiratory syndrome coronavirus 2 strain FDAARGOS_983 isolate 2019-nCoV/USA-WA1/2020, complete genome
MT246449	MT246449__USA__WA-UW192	SARS-CoV-2	USA	HUM	strain__WA-UW192	2020-03-26T00:00:00Z	Severe acute respiratory syndrome-related coronavirus	Betacoronavirus	Coronaviridae	29828		2020-03-13	Severe acute respiratory syndrome coronavirus 2 isolate SARS-CoV-2/WA-UW192/human/2020/USA, complete genome
MT246450	MT246450__USA__WA-UW193	SARS-CoV-2	USA	HUM	strain__WA-UW193	2020-03-26T00:00:00Z	Severe acute respiratory syndrome-related coronavirus	Betacoronavirus	Coronaviridae	29872		2020-03-13	Severe acute respiratory syndrome coronavirus 2 isolate SARS-CoV-2/WA-UW193/human/2020/USA, complete genome
MT246451	MT246451__USA__WA-UW194	SARS-CoV-2	USA	HUM	strain__WA-UW194	2020-03-26T00:00:00Z	Severe acute respiratory syndrome-related coronavirus	Betacoronavirus	Coronaviridae	29868		2020-03-13	Severe acute respiratory syndrome coronavirus 2 isolate SARS-CoV-2/WA-UW194/human/2020/USA, complete genome
MT246452	MT246452__USA__WA-UW195	SARS-CoV-2	USA	HUM	strain__WA-UW195	2020-03-26T00:00:00Z	Severe acute respiratory syndrome-related coronavirus	Betacoronavirus	Coronaviridae	29888		2020-03-13	Severe acute respiratory syndrome coronavirus 2 isolate SARS-CoV-2/WA-UW195/human/2020/USA, complete genome
MT246453	MT246453__USA__WA-UW196	SARS-CoV-2	USA	HUM	strain__WA-UW196	2020-03-26T00:00:00Z	Severe acute respiratory syndrome-related coronavirus	Betacoronavirus	Coronaviridae	29823		2020-03-13	Severe acute respiratory syndrome coronavirus 2 isolate SARS-CoV-2/WA-UW196/human/2020/USA, complete genome
MT246454	MT246454__USA__WA-UW197	SARS-CoV-2	USA	HUM	strain__WA-UW197	2020-03-26T00:00:00Z	Severe acute respiratory syndrome-related coronavirus	Betacoronavirus	Coronaviridae	29892		2020-03-12	Severe acute respiratory syndrome coronavirus 2 isolate SARS-CoV-2/WA-UW197/human/2020/USA, complete genome
MT246455	MT246455__USA__WA-UW198	SARS-CoV-2	USA	HUM	strain__WA-UW198	2020-03-26T00:00:00Z	Severe acute respiratory syndrome-related coronavirus	Betacoronavirus	Coronaviridae	29857		2020-03-12	Severe acute respiratory syndrome coronavirus 2 isolate SARS-CoV-2/WA-UW198/human/2020/USA, complete genome
MT246457	MT246457__USA__WA-UW200	SARS-CoV-2	USA	HUM	strain__WA-UW200	2020-03-26T00:00:00Z	Severe acute respiratory syndrome-related coronavirus	Betacoronavirus	Coronaviridae	29843		2020-03-12	Severe acute respiratory syndrome coronavirus 2 isolate SARS-CoV-2/WA-UW200/human/2020/USA, complete genome
MT246459	MT246459__USA__WA-UW202	SARS-CoV-2	USA	HUM	strain__WA-UW202	2020-03-26T00:00:00Z	Severe acute respiratory syndrome-related coronavirus	Betacoronavirus	Coronaviridae	29909		2020-03-12	Severe acute respiratory syndrome coronavirus 2 isolate SARS-CoV-2/WA-UW202/human/2020/USA, complete genome
MT246460	MT246460__USA__WA-UW203	SARS-CoV-2	USA	HUM	strain__WA-UW203	2020-03-26T00:00:00Z	Severe acute respiratory syndrome-related coronavirus	Betacoronavirus	Coronaviridae	29917		2020-03-12	Severe acute respiratory syndrome coronavirus 2 isolate SARS-CoV-2/WA-UW203/human/2020/USA, complete genome
MT246461	MT246461__USA__WA-UW204	SARS-CoV-2	USA	HUM	strain__WA-UW204	2020-03-26T00:00:00Z	Severe acute respiratory syndrome-related coronavirus	Betacoronavirus	Coronaviridae	29877		2020-03-13	Severe acute respiratory syndrome coronavirus 2 isolate SARS-CoV-2/WA-UW204/human/2020/USA, complete genome
MT246462	MT246462__USA__WA-UW205	SARS-CoV-2	USA	HUM	strain__WA-UW205	2020-03-26T00:00:00Z	Severe acute respiratory syndrome-related coronavirus	Betacoronavirus	Coronaviridae	29903		2020-03-13	Severe acute respiratory syndrome coronavirus 2 isolate SARS-CoV-2/WA-UW205/human/2020/USA, complete genome
MT246464	MT246464__USA__WA-UW207	SARS-CoV-2	USA	HUM	strain__WA-UW207	2020-03-26T00:00:00Z	Severe acute respiratory syndrome-related coronavirus	Betacoronavirus	Coronaviridae	29818		2020-03-13	Severe acute respiratory syndrome coronavirus 2 isolate SARS-CoV-2/WA-UW207/human/2020/USA, complete genome
MT246466	MT246466__USA__WA-UW209	SARS-CoV-2	USA	HUM	strain__WA-UW209	2020-03-26T00:00:00Z	Severe acute respiratory syndrome-related coronavirus	Betacoronavirus	Coronaviridae	29897		2020-03-13	Severe acute respiratory syndrome coronavirus 2 isolate SARS-CoV-2/WA-UW209/human/2020/USA, complete genome
MT246467	MT246467__USA__WA-UW210	SARS-CoV-2	USA	HUM	strain__WA-UW210	2020-03-26T00:00:00Z	Severe acute respiratory syndrome-related coronavirus	Betacoronavirus	Coronaviridae	29899		2020-03-14	Severe acute respiratory syndrome coronavirus 2 isolate SARS-CoV-2/WA-UW210/human/2020/USA, complete genome
MT246469	MT246469__USA__WA-UW212	SARS-CoV-2	USA	HUM	strain__WA-UW212	2020-03-26T00:00:00Z	Severe acute respiratory syndrome-related coronavirus	Betacoronavirus	Coronaviridae	29869		2020-03-14	Severe acute respiratory syndrome coronavirus 2 isolate SARS-CoV-2/WA-UW212/human/2020/USA, complete genome
MT246470	MT246470__USA__WA-UW213	SARS-CoV-2	USA	HUM	strain__WA-UW213	2020-03-26T00:00:00Z	Severe acute respiratory syndrome-related coronavirus	Betacoronavirus	Coronaviridae	29860		2020-03-13	Severe acute respiratory syndrome coronavirus 2 isolate SARS-CoV-2/WA-UW213/human/2020/USA, complete genome
MT246471	MT246471__USA__WA-UW214	SARS-CoV-2	USA	HUM	strain__WA-UW214	2020-03-26T00:00:00Z	Severe acute respiratory syndrome-related coronavirus	Betacoronavirus	Coronaviridae	29871		2020-03-14	Severe acute respiratory syndrome coronavirus 2 isolate SARS-CoV-2/WA-UW214/human/2020/USA, complete genome
MT246472	MT246472__USA__WA-UW215	SARS-CoV-2	USA	HUM	strain__WA-UW215	2020-03-26T00:00:00Z	Severe acute respiratory syndrome-related coronavirus	Betacoronavirus	Coronaviridae	29810		2020-03-12	Severe acute respiratory syndrome coronavirus 2 isolate SARS-CoV-2/WA-UW215/human/2020/USA, complete genome
MT246473	MT246473__USA__WA-UW216	SARS-CoV-2	USA	HUM	strain__WA-UW216	2020-03-26T00:00:00Z	Severe acute respiratory syndrome-related coronavirus	Betacoronavirus	Coronaviridae	29825		2020-03-14	Severe acute respiratory syndrome coronavirus 2 isolate SARS-CoV-2/WA-UW216/human/2020/USA, complete genome
MT246474	MT246474__USA__WA-UW217	SARS-CoV-2	USA	HUM	strain__WA-UW217	2020-03-26T00:00:00Z	Severe acute respiratory syndrome-related coronavirus	Betacoronavirus	Coronaviridae	29884		2020-03-14	Severe acute respiratory syndrome coronavirus 2 isolate SARS-CoV-2/WA-UW217/human/2020/USA, complete genome
MT246475	MT246475__USA__WA-UW218	SARS-CoV-2	USA	HUM	strain__WA-UW218	2020-03-26T00:00:00Z	Severe acute respiratory syndrome-related coronavirus	Betacoronavirus	Coronaviridae	29877		2020-03-13	Severe acute respiratory syndrome coronavirus 2 isolate SARS-CoV-2/WA-UW218/human/2020/USA, complete genome
MT246476	MT246476__USA__WA-UW219	SARS-CoV-2	USA	HUM	strain__WA-UW219	2020-03-26T00:00:00Z	Severe acute respiratory syndrome-related coronavirus	Betacoronavirus	Coronaviridae	29863		2020-03-13	Severe acute respiratory syndrome coronavirus 2 isolate SARS-CoV-2/WA-UW219/human/2020/USA, complete genome
MT246477	MT246477__USA__WA-UW220	SARS-CoV-2	USA	HUM	strain__WA-UW220	2020-03-26T00:00:00Z	Severe acute respiratory syndrome-related coronavirus	Betacoronavirus	Coronaviridae	29886		2020-03-14	Severe acute respiratory syndrome coronavirus 2 isolate SARS-CoV-2/WA-UW220/human/2020/USA, complete genome
MT246478	MT246478__USA__WA-UW221	SARS-CoV-2	USA	HUM	strain__WA-UW221	2020-03-26T00:00:00Z	Severe acute respiratory syndrome-related coronavirus	Betacoronavirus	Coronaviridae	29889		2020-03-14	Severe acute respiratory syndrome coronavirus 2 isolate SARS-CoV-2/WA-UW221/human/2020/USA, complete genome
MT246479	MT246479__USA__WA-UW222	SARS-CoV-2	USA	HUM	strain__WA-UW222	2020-03-26T00:00:00Z	Severe acute respiratory syndrome-related coronavirus	Betacoronavirus	Coronaviridae	29828		2020-03-13	Severe acute respiratory syndrome coronavirus 2 isolate SARS-CoV-2/WA-UW222/human/2020/USA, complete genome
MT246480	MT246480__USA__WA-UW223	SARS-CoV-2	USA	HUM	strain__WA-UW223	2020-03-26T00:00:00Z	Severe acute respiratory syndrome-related coronavirus	Betacoronavirus	Coronaviridae	29904		2020-03-13	Severe acute respiratory syndrome coronavirus 2 isolate SARS-CoV-2/WA-UW223/human/2020/USA, complete genome
MT246481	MT246481__USA__WA-UW224	SARS-CoV-2	USA	HUM	strain__WA-UW224	2020-03-26T00:00:00Z	Severe acute respiratory syndrome-related coronavirus	Betacoronavirus	Coronaviridae	29873		2020-03-13	Severe acute respiratory syndrome coronavirus 2 isolate SARS-CoV-2/WA-UW224/human/2020/USA, complete genome
MT246482	MT246482__USA__WA-UW225	SARS-CoV-2	USA	HUM	strain__WA-UW225	2020-03-26T00:00:00Z	Severe acute respiratory syndrome-related coronavirus	Betacoronavirus	Coronaviridae	29844		2020-03-15	Severe acute respiratory syndrome coronavirus 2 isolate SARS-CoV-2/WA-UW225/human/2020/USA, complete genome
MT246484	MT246484__USA__WA-UW227	SARS-CoV-2	USA	HUM	strain__WA-UW227	2020-03-26T00:00:00Z	Severe acute respiratory syndrome-related coronavirus	Betacoronavirus	Coronaviridae	29870		2020-03-15	Severe acute respiratory syndrome coronavirus 2 isolate SARS-CoV-2/WA-UW227/human/2020/USA, complete genome
MT246486	MT246486__USA__WA-UW229	SARS-CoV-2	USA	HUM	strain__WA-UW229	2020-03-26T00:00:00Z	Severe acute respiratory syndrome-related coronavirus	Betacoronavirus	Coronaviridae	29867		2020-03-14	Severe acute respiratory syndrome coronavirus 2 isolate SARS-CoV-2/WA-UW229/human/2020/USA, complete genome
MT246487	MT246487__USA__WA-UW230	SARS-CoV-2	USA	HUM	strain__WA-UW230	2020-03-26T00:00:00Z	Severe acute respiratory syndrome-related coronavirus	Betacoronavirus	Coronaviridae	29883		2020-03-15	Severe acute respiratory syndrome coronavirus 2 isolate SARS-CoV-2/WA-UW230/human/2020/USA, complete genome
MT246488	MT246488__USA__WA-UW231	SARS-CoV-2	USA	HUM	strain__WA-UW231	2020-03-26T00:00:00Z	Severe acute respiratory syndrome-related coronavirus	Betacoronavirus	Coronaviridae	29842		2020-03-14	Severe acute respiratory syndrome coronavirus 2 isolate SARS-CoV-2/WA-UW231/human/2020/USA, complete genome
MT246489	MT246489__USA__WA-UW232	SARS-CoV-2	USA	HUM	strain__WA-UW232	2020-03-26T00:00:00Z	Severe acute respiratory syndrome-related coronavirus	Betacoronavirus	Coronaviridae	29864		2020-03-14	Severe acute respiratory syndrome coronavirus 2 isolate SARS-CoV-2/WA-UW232/human/2020/USA, complete genome
MT246490	MT246490__USA__WA-UW233	SARS-CoV-2	USA	HUM	strain__WA-UW233	2020-03-26T00:00:00Z	Severe acute respiratory syndrome-related coronavirus	Betacoronavirus	Coronaviridae	29850		2020-03-15	Severe acute respiratory syndrome coronavirus 2 isolate SARS-CoV-2/WA-UW233/human/2020/USA, complete genome
MT246667	MT246667__USA__FDAARGOS_983	SARS-CoV-2	USA	HUM	strain__FDAARGOS_983	2020-03-26T00:00:00Z	Severe acute respiratory syndrome-related coronavirus	Betacoronavirus	Coronaviridae	29867	oronasopharynx	2020-01-19	Severe acute respiratory syndrome coronavirus 2 strain FDAARGOS_983 isolate 2019-nCoV/USA-WA1/2020, complete genome
MT251973	MT251973__USA__WA-UW237	SARS-CoV-2	USA	HUM	strain__WA-UW237	2020-03-27T00:00:00Z	Severe acute respiratory syndrome-related coronavirus	Betacoronavirus	Coronaviridae	29871		2020-03-14	Severe acute respiratory syndrome coronavirus 2 isolate SARS-CoV-2/WA-UW237/human/2020/USA, complete genome
MT251974	MT251974__USA__WA-UW238	SARS-CoV-2	USA	HUM	strain__WA-UW238	2020-03-27T00:00:00Z	Severe acute respiratory syndrome-related coronavirus	Betacoronavirus	Coronaviridae	29852		2020-03-12	Severe acute respiratory syndrome coronavirus 2 isolate SARS-CoV-2/WA-UW238/human/2020/USA, complete genome
MT251975	MT251975__USA__WA-UW239	SARS-CoV-2	USA	HUM	strain__WA-UW239	2020-03-27T00:00:00Z	Severe acute respiratory syndrome-related coronavirus	Betacoronavirus	Coronaviridae	29875		2020-03-14	Severe acute respiratory syndrome coronavirus 2 isolate SARS-CoV-2/WA-UW239/human/2020/USA, complete genome
MT251976	MT251976__USA__WA-UW240	SARS-CoV-2	USA	HUM	strain__WA-UW240	2020-03-27T00:00:00Z	Severe acute respiratory syndrome-related coronavirus	Betacoronavirus	Coronaviridae	29899		2020-03-14	Severe acute respiratory syndrome coronavirus 2 isolate SARS-CoV-2/WA-UW240/human/2020/USA, complete genome
MT251977	MT251977__USA__WA-UW234	SARS-CoV-2	USA	HUM	strain__WA-UW234	2020-03-27T00:00:00Z	Severe acute respiratory syndrome-related coronavirus	Betacoronavirus	Coronaviridae	29829		2020-03-14	Severe acute respiratory syndrome coronavirus 2 isolate SARS-CoV-2/WA-UW234/human/2020/USA, complete genome
MT251978	MT251978__USA__WA-UW235	SARS-CoV-2	USA	HUM	strain__WA-UW235	2020-03-27T00:00:00Z	Severe acute respiratory syndrome-related coronavirus	Betacoronavirus	Coronaviridae	29905		2020-03-14	Severe acute respiratory syndrome coronavirus 2 isolate SARS-CoV-2/WA-UW235/human/2020/USA, complete genome
MT251979	MT251979__USA__WA-UW241	SARS-CoV-2	USA	HUM	strain__WA-UW241	2020-03-27T00:00:00Z	Severe acute respiratory syndrome-related coronavirus	Betacoronavirus	Coronaviridae	29839		2020-03-14	Severe acute respiratory syndrome coronavirus 2 isolate SARS-CoV-2/WA-UW241/human/2020/USA, complete genome
MT251980	MT251980__USA__WA-UW242	SARS-CoV-2	USA	HUM	strain__WA-UW242	2020-03-27T00:00:00Z	Severe acute respiratory syndrome-related coronavirus	Betacoronavirus	Coronaviridae	29845		2020-03-13	Severe acute respiratory syndrome coronavirus 2 isolate SARS-CoV-2/WA-UW242/human/2020/USA, complete genome
MT192772	MT192772__VietNam__01S	SARS-CoV-2	VietNam	HUM	strain__01S	2020-03-16T00:00:00Z	Severe acute respiratory syndrome-related coronavirus	Betacoronavirus	Coronaviridae	29891		2020-01-22	Severe acute respiratory syndrome coronavirus 2 isolate SARS-CoV-2/nCoV-19-01S/human/2020/VNM, complete genome
MT192773	MT192773__VietNam__02S	SARS-CoV-2	VietNam	HUM	strain__02S	2020-03-16T00:00:00Z	Severe acute respiratory syndrome-related coronavirus	Betacoronavirus	Coronaviridae	29890		2020-01-22	Severe acute respiratory syndrome coronavirus 2 isolate SARS-CoV-2/nCoV-19-02S/human/2020/VNM, complete genome
